# Supplementary material for: A systematic review and functional in-silico analysis of genes and variants associated with amyotrophic lateral sclerosis
Source: Front Neurosci. 2025 Jun 16;19:1598336. doi: 10.3389/fnins.2025.1598336 (PMC12206810; doi:10.3389/fnins.2025.1598336)
Supplement: Supplementary Table 1 — List of publications retrieved from PubMed using the defined search query. [file Table_1.xlsx]

## Sheet: Hoja 1
PMID	Title	Publication Year
36732882	Evaluating the contribution of the gene TARDBP in Italian patients with amyotrophic lateral sclerosis	2023
36716437	Exploring the Folding Mechanism of Dimeric Superoxide Dismutase	2023
36716024	Incidence of Syndromes Associated With Frontotemporal Lobar Degeneration in 9 European Countries	2023
36707813	Three nervous system-specific expressed genes are potential biomarkers for the diagnosis of sporadic amyotrophic lateral sclerosis through a bioinformatic analysis	2023
36706877	Mechanistic insights into the conformational switch in profilin-1 subject to collective effects of mutation and histidine tautomerism	2023
36702823	Digital color-coded molecular barcoding reveals dysregulation of common FUS and FMRP targets in soma and neurites of ALS mutant motoneurons	2023
36701233	The selective autophagy adaptor p62/SQSTM1 forms phase condensates regulated by HSP27 that facilitate the clearance of damaged lysosomes via lysophagy	2023
36696267	FUS ALS neurons activate major stress pathways and reduce translation as an early protective mechanism against neurodegeneration	2023
36692889	Renal function and neurodegenerative diseases : a two-sample Mendelian randomization study	2023
36690069	Interactions between FUS and the C-terminal domain of Nup62 are sufficient for their co-phase separation into amorphous assemblies	2023
36686515	Case report: p.Glu134del SOD1 mutation in two apparently unrelated ALS patients with mirrored phenotype	2023
36679045	Diversity and Spread of Acetolactate Synthase Allelic Variants at Position 574 Endowing Resistance in Amaranthus hybridus in Italy	2023
36674783	Study of Ubiquitin Pathway Genes in a French Population with Amyotrophic Lateral Sclerosis: Focus on HECW1 Encoding the E3 Ligase NEDL1	2023
36674509	Protective Effects of Hexarelin and JMV2894 in a Human Neuroblastoma Cell Line Expressing the SOD1-G93A Mutated Protein	2023
36672132	The Role of Superoxide Dismutase 1 in Amyotrophic Lateral Sclerosis: Identification of Signaling Pathways, Regulators, Molecular Interaction Networks, and Biological Functions through Bioinformatics	2023
36670122	Integrative genetic analysis illuminates ALS heritability and identifies risk genes	2023
36662259	Phenylalanine ammonia-lyases: combining protein engineering and natural diversity	2023
36661322	Analysis of SOD1 Variants in Chinese Patients with Familial Amyotrophic Lateral Sclerosis	2023
36651622	Common pathophysiology for ANXA11 disorders caused by aspartate 40 variants	2023
36650645	Frequency of C9orf72 and SOD1 mutations in 302 sporadic ALS patients from three German ALS centers	2023
36646859	Relationship between cerebrospinal fluid/serum albumin quotient and phenotype in amyotrophic lateral sclerosis: a retrospective study on 328 patients	2023
36644447	Prevalence of Frontotemporal Dementia in Females of 5 Hispanic Families With R159H VCP Multisystem Proteinopathy	2023
36641216	Visualizing and accessing correlated SAXS data sets with Similarity Maps and Simple Scattering web resources	2023
36634675	RNA methylation influences TDP43 binding and disease pathogenesis in models of amyotrophic lateral sclerosis and frontotemporal dementia	2023
36619755	Comparative analysis of fungal communities between herbicide-resistant and -susceptible Alopecurus aequalis	2022
36619668	Loss of TMEM106B exacerbates C9ALS/FTD DPR pathology by disrupting autophagosome maturation	2022
36617536	Amyotrophic lateral sclerosis regional progression intervals change according to time of involvement of different body regions	2023
36606141	DNA damage stress-induced translocation of mutant FUS proteins into cytosolic granules and screening for translocation inhibitors	2022
36605066	Rapidly Progressive Frontotemporal Dementia With Amyotrophic Lateral Sclerosis in an Elderly Female	2022
36604770	Expanding the spectrum of KIF5A mutations-case report of a large kindred with familial ALS and overlapping syndrome	2023
36594740	The chaperone-assisted selective autophagy complex dynamics and dysfunctions	2023
36592929	A liquid-to-solid phase transition of Cu/Zn superoxide dismutase 1 initiated by oxidation and disease mutation	2022
36592411	Mutated FUS in familial amyotrophic lateral sclerosis involves multiple hnRNPs in the formation of neuronal cytoplasmic inclusions	2023
36587610	Age of onset and length of survival of Queensland patients with amyotrophic lateral sclerosis: with details of subjects with early onset and subjects with long survival	2022
36586129	Amyotrophic lateral sclerosis with primary progressive aphasia: a case report and literature review	2022
36582889	A novel TFG variant of uncertain significance in amyotrophic lateral sclerosis: A case report and review of literature	2022
36568378	Analysis of miRNA rare variants in amyotrophic lateral sclerosis and in silico prediction of their biological effects	2022
36565680	Generation of an iPSC line from a patient with spastic paraplegia type 10 carrying a novel mutation in KIF5A gene	2023
36563944	Protective effect of human umbilical cord mesenchymal stem cell derived conditioned medium in a mutant TDP-43 induced motoneuron-like cellular model of ALS	2023
36555863	Dysregulated Expression of Transposable Elements in TDP-43(M337V) Human Motor Neurons That Recapitulate Amyotrophic Lateral Sclerosis In Vitro	2022
36549973	Genetic landscape of ALS in Malta based on a quinquennial analysis	2023
36531982	Patient reported impact of symptoms in amyotrophic lateral sclerosis (PRISM-ALS): A national, cross-sectional study	2022
36529289	A minimal construct of nuclear-import receptor Karyopherin-β2 defines the regions critical for chaperone and disaggregation activity	2022
36527522	A patient carrying a heterozygous p.Asn267Ser TARDBP missense mutation diagnosed as ALS and only involving lower motor neurons	2023
36527420	MicroRNA-183-5p regulates TAR DNA-binding protein 43 neurotoxicity via SQSTM1/p62 in amyotrophic lateral sclerosis	2022
36522775	ALSFRS-R-SE: an adapted, annotated, and self-explanatory version of the revised amyotrophic lateral sclerosis functional rating scale	2022
36522764	Calculating variant penetrance from family history of disease and average family size in population-scale data	2022
36521271	Whole genome sequencing analysis reveals post-zygotic mutation variability in monozygotic twins discordant for amyotrophic lateral sclerosis	2023
36516294	Impaired ribosome-associated quality control of C9orf72 arginine-rich dipeptide-repeat proteins	2022
36515702	Genotype-phenotype characterisation of long survivors with motor neuron disease in Scotland	2022
36513817	[(18)F]RO948 tau positron emission tomography in genetic and sporadic frontotemporal dementia syndromes	2022
36511680	Analysis of SOD1 and C9orf72 mutations in patients with amyotrophic lateral sclerosis in Antioquia, Colombia	2022
36511398	Longitudinal Effects of Asymptomatic C9orf72 Carriership on Brain Morphology	2022
36511129	Investigation of a Fused in Sarcoma Splicing Mutation in a Chinese Amyotrophic Lateral Sclerosis Patient	2022
36510265	The mutational dynamics of short tandem repeats in large, multigenerational families	2022
36504281	The genetic regulation of protein expression in cerebrospinal fluid	2023
36502337	Defined Alginate Hydrogels Support Spinal Cord Organoid Derivation, Maturation, and Modeling of Spinal Cord Diseases	2022
36499097	Understanding In Vitro Pathways to Drug Discovery for TDP-43 Proteinopathies	2022
36495857	Distinct hypothalamic involvement in the amyotrophic lateral sclerosis-frontotemporal dementia spectrum	2022
36484631	Characterizing SOD1 mutations in Spain. The impact of genotype, age, and sex in the natural history of the disease	2022
36482247	Integrative transcriptomic analysis of the amyotrophic lateral sclerosis spinal cord implicates glial activation and suggests new risk genes	2023
36481270	Arginine-rich C9ORF72 ALS proteins stall ribosomes in a manner distinct from a canonical ribosome-associated quality control substrate	2023
36478403	Optimized prime editing efficiently generates heritable mutations in maize	2022
36475596	Amyotrophic Lateral Sclerosis-Associated Mutants of SOD1 Modulate miRNA Biogenesis through Aberrant Interactions with Exportin 5	2022
36474455	ALS Regional Variants (Brachial Amyotrophic Diplegia and Amyotrophic Leg Diplegia): Still A Diagnostic Challenge in Neurology	2023
36473746	Wasted leg syndrome: An atypical slowly-progressive form of lower motor neuron disease	2023
36472686	A novel homozygous p.Ser69Pro SOD1 mutation causes severe young-onset ALS with decreased enzyme activity	2022
36471413	Lithium carbonate in amyotrophic lateral sclerosis patients homozygous for the C-allele at SNP rs12608932 in UNC13A: protocol for a confirmatory, randomized, group-sequential, event-driven, double-blind, placebo-controlled trial	2022
36464361	Target gene mutation and enhanced metabolism confer fomesafen resistance in an Amaranthus retroflexus L. population from China	2022
36464346	Tribenuron-methyl metabolism and the rare Pro197Phe double mutation together with 2,4-D metabolism and reduced absorption can evolve in Papaver rhoeas with multiple and cross herbicide resistance to ALS inhibitors and auxin mimics	2022
36458618	A survey of current practice in genetic testing in amyotrophic lateral sclerosis in the UK and Republic of Ireland: implications for future planning	2022
36458208	Clinical and genetic characteristics of amyotrophic lateral sclerosis patients with ANXA11 variants	2022
36451215	Lack of association of TP73 rare variants with amyotrophic lateral sclerosis in a Chinese cohort	2022
36451185	Riluzole partially restores RNA polymerase III complex assembly in cells expressing the leukodystrophy-causative variant POLR3B R103H	2022
36447739	Genetic Screening in Korean Patients with Frontotemporal Dementia Syndrome	2022
36446187	Amyotrophic lateral sclerosis disease-related mutations disrupt the dimerization of superoxide dismutase 1 - A comparative molecular dynamics simulation study	2022
36445564	Novel compound heterozygous variants of SPG11 gene associated with young-adult amyotrophic lateral sclerosis	2022
36445400	Early onset hereditary neuronopathies: an update on non-5q motor neuron diseases	2022
36443167	Genetic and clinical characteristics of ALS patients with NEK1 gene variants	2023
36438121	An Asp376Glu substitution in ALS gene and enhanced metabolism confers high tribenuron-methyl resistance in Sinapis alba	2022
36437507	Knockdown of glutathione S-transferase leads to mislocalization and accumulation of cabeza, a drosophila homolog of FUS, in the brain	2022
36432773	First Report of the Molecular Mechanism of Resistance to Tribenuron-Methyl in Silene conoidea L	2022
36431311	No Association between the SORD Gene and Amyotrophic Lateral Sclerosis in a Chinese Cohort	2022
36428998	Evaluation of the Hematological and Serum Biochemistry Parameters in the Pre-Symptomatic and Symptomatic Stages of ALS Disease to Support Early Diagnosis and Prognosis	2022
36423739	UBQLN2 undergoes a reversible temperature-induced conformational switch that regulates binding with HSPA1B: ALS/FTD mutations cripple the switch but do not destroy HSPA1B binding	2023
36419075	Visinin-like protein 1 levels in blood and CSF as emerging markers for Alzheimer's and other neurodegenerative diseases	2022
36416085	A Zn-dependent structural transition of SOD1 modulates its ability to undergo phase separation	2023
36408501	Case analysis of early-onset Alzheimer's disease associated with TBK1 p.Tyr235Phe gene mutation	2022
36387505	A study of the heat-mediated phase transformations of praziquantel hydrates. Evaluation of their impact on the dissolution rate	2022
36385230	Widespread CNS pathology in amyotrophic lateral sclerosis homozygous for the D90A SOD1 mutation	2023
36385202	Motor symptoms in genetic frontotemporal dementia: developing a new module for clinical rating scales	2022
36380299	A randomised controlled trial of acceptance and commitment therapy plus usual care compared to usual care alone for improving psychological health in people with motor neuron disease (COMMEND): study protocol	2022
36376198	Pathogenicity classification of SOD1 variants of uncertain significance by in vitro aggregation propensity	2023
36371497	The SOD1-mediated ALS phenotype shows a decoupling between age of symptom onset and disease duration	2022
36366843	Amyotrophic Lateral Sclerosis Risk Genes and Suppressor	2022
36359827	The Potential Role of Cytotoxic Immune Effectors in Induction, Progression and Pathogenesis of Amyotrophic Lateral Sclerosis (ALS)	2022
36348166	Novel IGFALS mutations with predicted pathogenetic effects by the analysis of AlphaFold structure	2023
36345033	Mutation spectrum of chinese amyotrophic lateral sclerosis patients with frontotemporal dementia	2022
36341123	Clinical and genetic study of a Chinese family affected by both amyotrophic lateral sclerosis and autosomal dominant polycystic kidney disease	2022
36341099	Biological networks and complexity in early-onset motor neuron diseases	2022
36340727	Case report and literature review: Novel compound heterozygous FIG4 variants causing both of peripheral and central nervous system defects	2022
36330403	Causal effects of serum sex hormone binding protein levels on the risk of amyotrophic lateral sclerosis: a mendelian randomization study	2022
36321943	COVID-19 and the risk of Alzheimer's disease, amyotrophic lateral sclerosis, and multiple sclerosis	2022
36321541	New SOD1 Mutation Causing Rapid Amyotrophic Lateral Sclerosis with Nerve Root Enhancement	2022
36320012	Investigation of the causal relationship between ALS and autoimmune disorders: a Mendelian randomization study	2022
36313067	Clinical and Metabolic Signature of UNC13A rs12608932 Variant in Amyotrophic Lateral Sclerosis	2022
36310223	A Spectrophotometric Turbidity Assay to Study Liquid-Liquid Phase Separation of UBQLN2 In Vitro	2023
36305960	The efficacy of acoustic-based articulatory phenotyping for characterizing and classifying four divergent neurodegenerative diseases using sequential motion rates	2022
36293534	Discovery of Mitophagy Inhibitors with Therapeutic Potential in Different Familial Amyotrophic Lateral Sclerosis Mutations	2022
36291062	Efficient Gene Expression in Human Stem Cell Derived-Cortical Organoids Using Adeno Associated Virus	2022
36280624	Factors predicting disease progression in C9ORF72 ALS patients	2023
36278002	Retinal nerve fiber layer in frontotemporal lobar degeneration and amyotrophic lateral sclerosis	2022
36265587	Metal migration and subunit swapping in ALS-linked SOD1: Zn(2+) transfer between mutant and wild-type occurs faster than the rate of heterodimerization	2022
36264717	MicroRNA signatures in genetic frontotemporal dementia and amyotrophic lateral sclerosis	2022
36261296	Finding Common Ground on the Site of Onset of Amyotrophic Lateral Sclerosis	2022
36261283	The SYNGAP1 3'UTR Variant in ALS Patients Causes Aberrant SYNGAP1 Splicing and Dendritic Spine Loss by Recruiting HNRNPK	2022
36261266	Loss of Activity-Induced Mitochondrial ATP Production Underlies the Synaptic Defects in a Drosophila Model of ALS	2022
36248644	Natural killer cells-related immune traits and amyotrophic lateral sclerosis: A Mendelian randomization study	2022
36247987	TARDBP mutations in a cohort of Italian patients with Parkinson's disease and atypical parkinsonisms	2022
36235505	Growth and Competitiveness of ALS-Inhibiting Herbicide-Resistant Amaranthus retroflexus L	2022
36233180	Mitochondrial and Endoplasmic Reticulum Alterations in a Case of Amyotrophic Lateral Sclerosis Caused by TDP-43 A382T Mutation	2022
36232630	Damaged DNA Is an Early Event of Neurodegeneration in Induced Pluripotent Stem Cell-Derived Motoneurons with UBQLN2(P497H) Mutation	2022
36226410	Selective C9orf72 G-Quadruplex-Binding Small Molecules Ameliorate Pathological Signatures of ALS/FTD Models	2022
36226077	ANXA11 mutations are associated with amyotrophic lateral sclerosis-frontotemporal dementia	2022
36223668	Clinical relevance of single-subject brain metabolism patterns in amyotrophic lateral sclerosis mutation carriers	2022
36219176	miRNA analysis reveals novel dysregulated pathways in amyotrophic lateral sclerosis	2022
36215050	Distinguishing Frontotemporal Lobar Degeneration Tau From TDP-43 Using Plasma Biomarkers	2022
36213785	A pathological link between dysregulated copper binding in Cu/Zn-superoxide dismutase and amyotrophic lateral sclerosis	2022
36212040	Physical activities and risk of neurodegenerative diseases: A two-sample Mendelian randomization study	2022
36204986	A de novo c.113 T > C: p.L38R mutation of SPTLC1: case report of a girl with sporadic juvenile amyotrophic lateral sclerosis	2022
36204657	The use of CRISPR to generate a whole-gene humanized MAPT and the examination of P301L and G272V clinical variants, along with the creation of deletion null alleles of ptl-1, pgrn-1 and alfa-1 loci	2022
36180233	Physiological intron retaining transcripts in the cytoplasm abound during human motor neurogenesis	2022
36180205	Identifying the molecular drivers of ALS-implicated missense mutations	2022
36169607	Mutation-specific metabolic profiles in presymptomatic amyotrophic lateral sclerosis	2023
36168806	Familial ALS-associated SFPQ variants promote the formation of SFPQ cytoplasmic aggregates in primary neurons	2022
36163369	Conformational change of RNA-helicase DHX30 by ALS/FTD-linked FUS induces mitochondrial dysfunction and cytosolic aggregates	2022
36162820	The impact of age on genetic testing decisions in amyotrophic lateral sclerosis	2022
36158554	Genetically predicted circulating levels of glycine, glutamate, and serotonin in relation to the risks of three major neurodegenerative diseases: A Mendelian randomization analysis	2022
36148898	Familial Cerebellar Ataxia and Amyotrophic Lateral Sclerosis/Frontotemporal Dementia with DAB1 and C9ORF72 Repeat Expansions: An 18-Year Study	2022
36134701	Adult-onset dominant muscular dystrophy in Greek families caused by Annexin A11	2022
36130843	APOE Alleles With Tau and Aβ Pathology in Patients With Amyotrophic Lateral Sclerosis and Parkinsonism-Dementia Complex in the Kii Peninsula	2022
36129998	Trial of Antisense Oligonucleotide Tofersen for SOD1 ALS	2022
36129856	Disease progression score estimation from multimodal imaging and microRNA data using supervised variational autoencoders	2022
36127055	Multiple resistance mechanisms to penoxsulam in Echinochloa crus-galli from China	2022
36121546	Progressive motor neuron syndromes with single CNS lesions and CSF oligoclonal bands: never forget solitary sclerosis!	2022
36120587	The PTPIP51 coiled-coil domain is important in VAPB binding, formation of ER-mitochondria contacts and IP3 receptor delivery of Ca(2+) to mitochondria	2022
36117051	Study of Alzheimer's disease- and frontotemporal dementia-associated genes in the Cretan Aging Cohort	2023
36114006	ALS-linked loss of Cyclin-F function affects HSP90	2022
36112647	ALS mutations in the TIA-1 prion-like domain trigger highly condensed pathogenic structures	2022
36108486	Genotype-phenotype correlation in Tunisian patients with Amyotrophic Lateral Sclerosis	2022
36105853	Phenotype Analysis of Fused in Sarcoma Mutations in Amyotrophic Lateral Sclerosis	2022
36090855	Case report: A variant of the FIG4 gene with rapidly progressive amyotrophic lateral sclerosis	2022
36084484	ALS mutations in both human skeletal muscle and motoneurons differentially affects neuromuscular junction integrity and function	2022
36083789	Superoxide Dismutase 1 Folding Stability as a Target for Molecular Tweezers in SOD1-Related Amyotrophic Lateral Sclerosis	2022
36077049	Downstream Effects of Mutations in SOD1 and TARDBP Converge on Gene Expression Impairment in Patient-Derived Motor Neurons	2022
36073198	Semantic variant primary progressive aphasia with a pathogenic variant p.Asp40Gly in the ANXA11 gene	2022
36070099	Random forest modelling demonstrates microglial and protein misfolding features to be key phenotypic markers in C9orf72-ALS	2022
36069759	Highly efficient generation of isogenic pluripotent stem cell models using prime editing	2022
36068612	The associations between plasma soluble Trem1 and neurological diseases: a Mendelian randomization study	2022
36062310	Cyclin F, Neurodegeneration, and the Pathogenesis of ALS/FTD	2022
36055117	Lab resource: Single cell line generation and characterization of a human-derived induced pluripotent stem cell line (IGIBi005-A) from a patient with spastic paraplegia/ataxia/ALS phenotype due to the mutation of the gene Kinesin Family Member 5A (KIF5A)	2022
36054734	MRI Clustering Reveals Three ALS Subtypes With Unique Neurodegeneration Patterns	2022
36053560	Atomistic Insights into A315E Mutation-Enhanced Pathogenicity of TDP-43 Core Fibrils	2022
36051868	Genetically predicted telomere length and its relationship with neurodegenerative diseases and life expectancy	2022
36047371	Effect of neurofilament analysis on the diagnostic delay in amyotrophic lateral sclerosis	2023
36046231	Effects of ulcerative colitis and Crohn's disease on neurodegenerative diseases: A Mendelian randomization study	2022
36042248	Intronic NEFH variant is associated with reduced risk for sporadic ALS and later age of disease onset	2022
36039692	Survey of ACCase and ALS resistance in winter annual grasses identifies target-site and nontarget-site imazamox resistance in Secale cereale	2022
36031890	TREM2 Gene Compound Heterozygosity in Neurodegenerative Disorders	2022
36013279	Selecting Genetic Variants and Interactions Associated with Amyotrophic Lateral Sclerosis: A Group LASSO Approach	2022
36008116	Exploring the phenotype of Italian patients with ALS with intermediate ATXN2 polyQ repeats	2022
36007056	Hyperphosphorylation-Mimetic TDP-43 Drives Amyloid Formation and Possesses Neuronal Toxicity at the Oligomeric Stage	2022
36000313	CYLD variants identified in Alzheimer's disease and frontotemporal dementia patients	2022
35999998	Radio Electric Asymmetric Conveyer (REAC) Neurobiological Stimulation Treatments in Dysfunctional Motor Behavior in Flail Arm Syndrome: A Case Report	2022
35985819	Behavioral and Cognitive Phenotypes of Patients With Amyotrophic Lateral Sclerosis Carrying SOD1 Variants	2022
35974122	Muscle and skin fibroblast TDP-43 expression, dynamic mutation analysis of NOTCH2NLC and C9orf72 in patients with FOSMN	2022
35973771	Investigation of resistance mechanisms to bentazone in multiple resistant Amaranthus retroflexus populations	2022
35973769	A novel naturally Phe206Tyr mutation confers tolerance to ALS-inhibiting herbicides in Alopecurus myosuroides	2022
35973760	Multiple resistance to ALS-inhibiting and PPO-inhibiting herbicides in Chenopodium album L. from China	2022
35963498	Characterisation of retrotransposon insertion polymorphisms in whole genome sequencing data from individuals with amyotrophic lateral sclerosis	2022
35950246	mtDNA Maintenance and Alterations in the Pathogenesis of Neurodegenerative Diseases	2022
35948990	REViewer: haplotype-resolved visualization of read alignments in and around tandem repeats	2022
35948443	Frequency and Longitudinal Course of Motor Signs In Genetic Frontotemporal Dementia	2022
35943083	Mechanism underlying liquid-to-solid phase transition in fused in sarcoma liquid droplets	2022
35938928	The VINE complex is an endosomal VPS9-domain GEF and SNX-BAR coat	2022
35933467	Integrative Profiling of Amyotrophic Lateral Sclerosis Lymphoblasts Identifies Unique Metabolic and Mitochondrial Disease Fingerprints	2022
35933239	Fast versus slow disease progression in amyotrophic lateral sclerosis-clinical and genetic factors at the edges of the survival spectrum	2022
35932023	Identification of TARDBP Gly298Ser as a founder mutation for amyotrophic lateral sclerosis in Southern China	2022
35923349	Questioning the Association of the STMN2 Dinucleotide Repeat With Amyotrophic Lateral Sclerosis	2022
35911889	Profiling morphologic MRI features of motor neuron disease caused by TARDBP mutations	2022
35910659	Xylella fastidiosa Infection Reshapes Microbial Composition and Network Associations in the Xylem of Almond Trees	2022
35907924	Structural basis for assembly and disassembly of the IGF/IGFBP/ALS ternary complex	2022
35900868	SPTLC1 variants associated with ALS produce distinct sphingolipid signatures through impaired interaction with ORMDL proteins	2022
35896380	Systematic evaluation of genetic mutations in ALS: a population-based study	2022
35893630	Occurrence of Bensulfuron-Methyl Resistance and Target-Site Resistance Mechanisms in Ammannia auriculata Biotypes from Paddy Fields	2022
35879519	Cellular analysis of SOD1 protein-aggregation propensity and toxicity: a case of ALS with slow progression harboring homozygous SOD1-D92G mutation	2022
35879052	Identification of RNF13 as cause of recessively inherited ALS in a multi-case pedigree	2022
35873773	Exome Sequencing of a Portuguese Cohort of Frontotemporal Dementia Patients: Looking Into the ALS-FTD Continuum	2022
35872467	Immature ALS-associated mutant superoxide dismutases form variable aggregate structures through distinct oligomerization processes	2022
35871544	Atypical TDP-43 protein expression in an ALS pedigree carrying a p.Y374X truncation mutation in TARDBP	2023
35869263	Amyotrophic lateral sclerosis and cerebellum	2022
35865348	P97/VCP ATPase inhibitors can rescue p97 mutation-linked motor neuron degeneration	2022
35858577	Nuclear RNA binding regulates TDP-43 nuclear localization and passive nuclear export	2022
35852402	A novel mutation in the ALS2 gene in an iranian kurdish family with juvenile amyotrophic lateral sclerosis	2023
35847202	Fertility Does Not Alter Disease Progression in ALS Patients of Childbearing Age: A Three Centers Retrospective Analysis in Southern China	2022
35845697	Genome-Guided Analysis of Seven Weed Species Reveals Conserved Sequence and Structural Features of Key Gene Targets for Herbicide Development	2022
35845111	Frustration analysis of TBK1 missense mutations reported in ALS/FTD and cancer patients	2022
35838935	Brain structural and perfusion changes in amyotrophic lateral sclerosis-frontotemporal dementia patients with cognitive and motor onset: a preliminary study	2022
35835219	Unraveling the toxic effects mediated by the neurodegenerative disease-associated S375G mutation of TDP-43 and its S375E phosphomimetic variant	2022
35833217	FUS as a cause of familial Amyotrophic lateral sclerosis, a case report in a pregnant patient	2022
35832068	Parkinsonian Syndromes in Motor Neuron Disease: A Clinical Study	2022
35830688	Circulating insulin-like growth factor system adaptations in hibernating brown bears indicate increased tissue IGF availability	2022
35812739	Causal Inference of Genetic Variants and Genes in Amyotrophic Lateral Sclerosis	2022
35812163	FUS-P525L Juvenile Amyotrophic Lateral Sclerosis and Intellectual Disability: Evidence for Association and Oligogenic Inheritance	2022
35807597	Mechanism of Resistance to Pyroxsulam in Multiple-Resistant Alopecurus myosuroides from China	2022
35807593	Pro-197-Ser Mutation and Cytochrome P450-Mediated Metabolism Conferring Resistance to Flucarbazone-Sodium in Bromus japonicus	2022
35802580	Development and validation of monoclonal antibodies specific for Candida albicans Als2, Als9-1, and Als9-2	2022
35801182	A C-Terminally Truncated TDP-43 Splice Isoform Exhibits Neuronal Specific Cytoplasmic Aggregation and Contributes to TDP-43 Pathology in ALS	2022
35793404	Expanding the phenotype of TARDBP mutation in a Tunisian family with clinical phenotype heterogeneity	2022
35790423	Differences in Motor Features of C9orf72, MAPT, or GRN Variant Carriers With Familial Frontotemporal Lobar Degeneration	2022
35777956	Multi-omics profiling identifies a deregulated FUS-MAP1B axis in ALS/FTD-associated UBQLN2 mutants	2022
35768328	G507D mutation in FUS gene causes familial amyotrophic lateral sclerosis with a specific genotype-phenotype correlation	2022
35767952	Recognition of the TDP-43 nuclear localization signal by importin α1/β	2022
35766328	Myelin loss in C9orf72 hexanucleotide expansion carriers	2022
35758309	ALS-associated A315E and A315pT variants exhibit distinct mechanisms in inducing irreversible aggregation of TDP-43(312-317) peptides	2022
35754054	Genetic factors for survival in amyotrophic lateral sclerosis: an integrated approach combining a systematic review, pairwise and network meta-analysis	2022
35753527	Misfolding-Associated Exposure of Natively Buried Residues in Mutant SOD1 Facilitates Binding to TRAF6	2022
35752055	Does epilepsy contribute to the clinical phenotype of C9orf72 mutation in fronto-temporal dementia?	2022
35751132	Novel insights into the structural changes induced by disease-associated mutations in TDP-43: a computational approach	2022
35746899	A pathologically confirmed case of combined amyotrophic lateral sclerosis with C9orf72 mutation and multiple system atrophy	2022
35741698	Nonalcoholic Fatty Liver Disease in Patients with Inherited and Sporadic Motor Neuron Degeneration	2022
35735139	ALS-linked KIF5A ΔExon27 mutant causes neuronal toxicity through gain-of-function	2022
35733060	A strong association between VEGF-A rs28357093 and amyotrophic lateral sclerosis: a brazilian genetic study	2022
35731316	Missense mutation in ATXN2 gene (c.2860C > T) in an amyotrophic lateral sclerosis patient with aggressive disease phenotype	2022
35715065	Multiple resistance to ACCase- and ALS-inhibiting herbicides in black-grass (Alopecurus myosuroides Huds.) in China	2022
35715050	P450s mediated enhanced herbicide metabolism involved in the thifensulfuron-methyl resistance in Ipomoea purpurea L	2022
35715029	Resistance to ALS inhibitors conferred by non-target-site resistance mechanisms in Myosoton aquaticum L	2022
35714448	Production of CSSi013-A (9360) iPSC line from an asymptomatic subject carrying an heterozygous mutation in TDP-43 protein	2022
35710109	A homozygous variant in CHMP3 is associated with complex hereditary spastic paraplegia	2022
35709984	Proximity-based labeling reveals DNA damage-induced phosphorylation of fused in sarcoma (FUS) causes distinct changes in the FUS protein interactome	2022
35698878	Implementing microwell slides for detection and isolation of single circulating tumor cells from complex cell suspensions	2022
35690129	Probing the polyphenolic flavonoid, morin as a highly efficacious inhibitor against amyloid(A4V) mutant SOD1 in fatal amyotrophic lateral sclerosis	2022
35686856	Effects of Protein Crowders and Charge on the Folding of Superoxide Dismutase 1 Variants: A Computational Study	2022
35669191	Association Between C-Reactive Protein and Risk of Amyotrophic Lateral Sclerosis: A Mendelian Randomization Study	2022
35667444	Unfolding and aggregation of oxidized metal-deficient superoxide dismutase and isoflavone inhibition based on ion mobility mass spectrometry and ThT fluorescence assay	2022
35667216	Generation of an induced pluripotent stem cell line (UCSCi002-A) from a patient with a variant in TARDBP gene associated with familial amyotrophic lateral sclerosis and frontotemporal dementia	2022
35666129	Visualizing molecules of functional human profilin	2022
35666053	Targeted copy number variant identification across the neurodegenerative disease spectrum	2022
35665030	Differentiating Slowly Progressive Subtype of Lower Limb Onset ALS From Typical ALS Depends on the Time of Disease Progression and Phenotype	2022
35661131	C9orf72 hexanucleotide repeat expansion found in suspected spinobulbar muscular atrophy (SBMA)	2022
35646935	Sequence Determinants of TDP-43 Ribonucleoprotein Condensate Formation and Axonal Transport in Neurons	2022
35643629	The SGYS motif of TAF15 prion-like domain is critical to amyloid fibril formation	2022
35642252	Mutation Screening of TFG in α-Synucleinopathy and Amyotrophic Lateral Sclerosis	2022
35641224	Pathogenic Mutation of TDP-43 Impairs RNA Processing in a Cell Type-Specific Manner: Implications for the Pathogenesis of ALS/FTLD	2022
35627278	New Insights into the Neuromyogenic Spectrum of a Gain of Function Mutation in SPTLC1	2022
35627142	Genetic Variability of Inflammation and Oxidative Stress Genes Affects Onset, Progression of the Disease and Survival of Patients with Amyotrophic Lateral Sclerosis	2022
35624917	Co-Occurrence of Multiple Sclerosis and Amyotrophic Lateral Sclerosis in an FUS-Mutated Patient: A Case Report	2022
35624679	Characterization of the p.L145F and p.S135N Mutations in SOD1: Impact on the Metabolism of Fibroblasts Derived from Amyotrophic Lateral Sclerosis Patients	2022
35624228	Oxidative stress monitoring in iPSC-derived motor neurons using genetically encoded biosensors of H(2)O(2)	2022
35602517	Diagnostic Circulating miRNAs in Sporadic Amyotrophic Lateral Sclerosis	2022
35599735	The Clinical and Polynucleotide Repeat Expansion Analysis of ATXN2, NOP56, AR and C9orf72 in Patients With ALS From Mainland China	2022
35594156	Mild motor impairment as prodromal state in amyotrophic lateral sclerosis: a new diagnostic entity	2022
35590152	Integrating functional genomics with genetics to understand the biology of ALS and FTD	2022
35589711	Poly(GR) and poly(GA) in cerebrospinal fluid as potential biomarkers for C9ORF72-ALS/FTD	2022
35585374	Design of a Randomized, Placebo-Controlled, Phase 3 Trial of Tofersen Initiated in Clinically Presymptomatic SOD1 Variant Carriers: the ATLAS Study	2022
35581240	Nuclear RNA transcript levels modulate nucleocytoplasmic distribution of ALS/FTD-associated protein FUS	2022
35576897	Genetic Epidemiology of Amyotrophic Lateral Sclerosis in Norway: A 2-Year Population-Based Study	2022
35576218	A molecular view of amyotrophic lateral sclerosis through the lens of interaction network modules	2022
35568699	Glycoprotein nonmetastatic melanoma protein B (GNMPB) as a novel biomarker for cerebral adrenoleukodystrophy	2022
35561797	Comparison between the mechanisms of Clearfield ® wheat and Lolium rigidum multiple resistant to acetyl CoA carboxylase and acetolactate synthase inhibitors	2022
35550112	A novel missense HNRNPA1 variant in the PY-NLS domain in a patient with late-onset distal myopathy	2022
35545612	A rare variant analysis framework using public genotype summary counts to prioritize disease-predisposition genes	2022
35538136	Pollen-mediated transfer of herbicide resistance between johnsongrass (Sorghum halepense) biotypes	2022
35537620	Zinc binding loop mutations of hSOD1 promote amyloid fibrils under physiological conditions: Implications for initiation of amyotrophic lateral sclerosis	2022
35537341	Methylome analysis of ALS patients and presymptomatic mutation carriers in blood cells	2022
35525134	Re-analysis of the Hungarian amyotrophic lateral sclerosis population and evaluation of novel ALS genetic risk variants	2022
35512496	Lack of association of TP73 with amyotrophic lateral sclerosis in a large cohort of cases	2022
35511239	Parallel Appearance of Polyglutamine and Transactivation-Responsive DNA-Binding Protein 43 and Their Complementary Subcellular Localization in Brains of Patients With Spinocerebellar Ataxia Type 2	2022
35503374	A SUMO4 initiator codon variant in amyotrophic lateral sclerosis reduces SUMO4 expression and alters stress granule dynamics	2022
35495061	TDP-43 Oligomerization and Phase Separation Properties Are Necessary for Autoregulation	2022
35495032	NEK1 Variants in a Cohort of Italian Patients With Amyotrophic Lateral Sclerosis	2022
35481267	Analysis of ERBB4 Variants in Amyotrophic Lateral Sclerosis Within a Chinese Cohort	2022
35470453	Bridging the gap: Short structural variants in the genetics of anorexia nervosa	2022
35467758	Redox profiles of amyotrophic lateral sclerosis lymphoblasts with or without known SOD1 mutations	2022
35453569	Epidemiological, Clinical and Genetic Features of ALS in the Last Decade: A Prospective Population-Based Study in the Emilia Romagna Region of Italy	2022
35441136	Unbiased metabolome screen leads to personalized medicine strategy for amyotrophic lateral sclerosis	2022
35438230	Gel-like inclusions of C-terminal fragments of TDP-43 sequester stalled proteasomes in neurons	2022
35426263	Quadruple genetic variants in a sporadic ALS patient	2022
35419562	A Single Transcript Knockdown-Replacement Strategy Employing 5' UTR Secondary Structures to Precisely Titrate Rescue Protein Translation	2022
35413805	Covid-19 threat and coping: application of protection motivation theory to the pandemic experiences of people affected by amyotrophic lateral sclerosis	2022
35412284	Assessment of Mitochondrial Trafficking as a Surrogate for Fast Axonal Transport in Human Induced Pluripotent Stem Cell-Derived Spinal Motor Neurons	2022
35412232	Hormone-Inducible Transport Reporter Assay to Study Nuclear Import Defects in Neurodegenerative Diseases	2022
35409310	Expression of Huntingtin and TDP-43 Derivatives in Fission Yeast Can Cause Both Beneficial and Toxic Effects	2022
35406813	Alteration of Mitochondrial Integrity as Upstream Event in the Pathophysiology of SOD1-ALS	2022
35402516	First Principles Calculation of Protein-Protein Dimer Affinities of ALS-Associated SOD1 Mutants	2022
35401706	Novel Genetic Signatures Associated With Sporadic Amyotrophic Lateral Sclerosis	2022
35401153	Body Complexion and Circulating Lipids in the Risk of TDP-43 Related Disorders	2022
35385738	ALS-associated KIF5A mutations abolish autoinhibition resulting in a toxic gain of function	2022
35384603	SARS-CoV-2 impairs the disassembly of stress granules and promotes ALS-associated amyloid aggregation	2022
35383530	Autophagopathies: from autophagy gene polymorphisms to precision medicine for human diseases	2022
35382840	CSF sTREM2 in neurological diseases: a two-sample Mendelian randomization study	2022
35371165	Generation of Transfer-DNA-Free Base-Edited Citrus Plants	2022
35370538	Characterisation of the Function of a SINE-VNTR-Alu Retrotransposon to Modulate Isoform Expression at the MAPT Locus	2022
35366689	GGC repeat expansions in NOTCH2NLC causing a phenotype of lower motor neuron syndrome	2022
35364344	The inhibitory effects of MIF on accumulation of canine degenerative myelopathy-associated mutant SOD1 aggregation	2022
35361972	Whole-genome sequencing reveals that variants in the Interleukin 18 Receptor Accessory Protein 3'UTR protect against ALS	2022
35355568	Clinical Characteristics and Pathogenic Gene Identification in Chinese Patients With Paget's Disease of Bone	2022
35351820	Brain (18)fluorodeoxyglucose-positron emission tomography changes in amyotrophic lateral sclerosis with TARDBP mutations	2022
35351301	Primary metabolism in an Amaranthus palmeri population with multiple resistance to glyphosate and pyrithiobac herbicides	2022
35350711	Transactive response DNA-binding protein-43 proteinopathy in oligodendrocytes revealed using an induced pluripotent stem cell model	2021
35349255	Structures of the Wild-Type and S59L Mutant CHCHD10 Proteins Important in Amyotrophic Lateral Sclerosis-Frontotemporal Dementia	2022
35334143	A novel Phe-206-Leu mutation in acetolactate synthase confers resistance to penoxsulam in barnyardgrass (Echinochloa crus-galli (L.) P. Beauv)	2022
35328090	SOD-1 Variants in Amyotrophic Lateral Sclerosis: Systematic Re-Evaluation According to ACMG-AMP Guidelines	2022
35327632	Frontotemporal Lobar Degeneration Case with an N-Terminal TUBA4A Mutation Exhibits Reduced TUBA4A Levels in the Brain and TDP-43 Pathology	2022
35325762	Examining empathy deficits across familial forms of frontotemporal dementia within the GENFI cohort	2022
35319354	Antioxidant Responses are Crucial for Defense against Misfolded Human Z-Type α(1)-Antitrypsin	2022
35309588	A Novel TBK1 Variant (Lys694del) Presenting With Corticobasal Syndrome in a Family With FTD-ALS Spectrum Diseases: Case Report	2022
35298913	Advancing discovery of risk-altering variants for complex diseases by functionally informed fine-mapping	2022
35295181	ALS in Finland: Major Genetic Variants and Clinical Characteristics of Patients With and Without the C9orf72 Hexanucleotide Repeat Expansion	2022
35287545	Follicular lymphoma-associated mutations in the V-ATPase chaperone VMA21 activate autophagy creating a targetable dependency	2022
35286370	Antisense therapies in neurological diseases	2022
35285826	Optogenetic Phase Transition of TDP-43 in Spinal Motor Neurons of Zebrafish Larvae	2022
35283724	Novel Intronic Mutations of TBK1 Promote Aberrant Splicing Modes in Amyotrophic Lateral Sclerosis	2022
35279757	Schizotypal traits across the amyotrophic lateral sclerosis-frontotemporal dementia spectrum: pathomechanistic insights	2022
35279595	Focal thalamus pathology in frontotemporal dementia: Phenotype-associated thalamic profiles	2022
35275534	Investigating Casual Associations Among Gut Microbiota, Metabolites, and Neurodegenerative Diseases: A Mendelian Randomization Study	2022
35259014	Poly-dipeptides produced from C9orf72 hexanucleotide repeats cause selective motor neuron hyperexcitability in ALS	2022
35253968	Respiratory onset of amyotrophic lateral sclerosis in a pregnant woman with a novel SOD1 mutation	2022
35252808	Molecular determinants and modifiers of Matrin-3 toxicity, condensate dynamics, and droplet morphology	2022
35250268	Effect of the Minor C Allele of CNTN4 rs2619566 on Medial Hypothalamic Connectivity in Early-Stage Patients of Chinese Han Ancestry with Sporadic Amyotrophic Lateral Sclerosis	2022
35249138	Common genetic basis of ALS patients and soccer players may contribute to disease risk	2022
35248815	Biochemical characterization of actin assembly mechanisms with ALS-associated profilin variants	2022
35247836	Generation of a heterozygous FUS-Q290X knock in human embryonic stem cell line (WAe009-A-83) using CRISPR/Cas9 system	2022
35246398	InFUSing antisense oligonucleotides for treating ALS	2022
35239007	Genotype-phenotype association of TARDBP mutations in Chinese patients with amyotrophic lateral sclerosis: a single-center study and systematic review of published literature	2022
35238548	1,2-Dehydropyrrolizidine Alkaloids: Their Potential as a Dietary Cause of Sporadic Motor Neuron Diseases	2022
35237655	Selection and Modelling of a New Single-Domain Intrabody Against TDP-43	2022
35237611	Cysteine Substitution and Calcium-Binding Mutations in FBN1 cbEGF-Like Domains Are Associated With Severe Ocular Involvement in Patients With Congenital Ectopia Lentis	2022
35234271	Lack of an association between SCFD1 rs10139154 polymorphism and amyotrophic lateral sclerosis	2022
35232585	Nuclear pore destruction and loss of nuclear TDP-43 in FUS mutation-related amyotrophic lateral sclerosis motor neurons	2022
35231559	TDP-43 is a ubiquitylation substrate of the SCF(cyclin F) complex	2022
35217500	Cortical and subcortical changes in resting-state neuronal activity and connectivity in early symptomatic ALS and advanced frontotemporal dementia	2022
35217127	Novel oxindole compounds inhibit the aggregation of amyloidogenic proteins associated with neurodegenerative diseases	2022
35214801	A Target-Site Mutation Confers Cross-Resistance to ALS-Inhibiting Herbicides in Erigeron sumatrensis from Brazil	2022
35208248	2-Year-Old and 3-Year-Old Italian ALS Patients with Novel ALS2 Mutations: Identification of Key Metabolites in Their Serum and Plasma	2022
35208176	TDP-43 Proteinopathy Causes Broad Metabolic Alterations including TCA Cycle Intermediates and Dopamine Levels in Drosophila Models of ALS	2022
35197922	Phenotype of VCP Mutations in Chinese Amyotrophic Lateral Sclerosis Patients	2022
35197628	TDP-43 loss and ALS-risk SNPs drive mis-splicing and depletion of UNC13A	2022
35197626	TDP-43 represses cryptic exon inclusion in the FTD-ALS gene UNC13A	2022
35194965	Muscle cells of sporadic amyotrophic lateral sclerosis patients secrete neurotoxic vesicles	2022
35193472	Survival analysis of clinical and genetic factors in an amyotrophic lateral sclerosis cohort from China	2022
35188026	Incidence of amyotrophic lateral sclerosis in Sardinia, Italy: age-sex interaction and spatial-temporal variability	2022
35173147	CHCHD2 and CHCHD10 regulate mitochondrial dynamics and integrated stress response	2022
35170382	Does limited EMG denervation in early primary lateral sclerosis predict amyotrophic lateral sclerosis?	2022
35169211	Association between type 2 diabetes and amyotrophic lateral sclerosis	2022
35161381	Acetolactate Synthase-Inhibitor Resistance in Monochoria vaginalis (Burm. f.) C. Presl from Indonesia	2022
35154965	Atypical Familial Amyotrophic Lateral Sclerosis Secondary to Superoxide Dismutase 1 Gene Mutation With Coexistent Axonal Polyneuropathy: A Challenging Diagnosis	2022
35151113	Causal associations of genetic factors with clinical progression in amyotrophic lateral sclerosis	2022
35144097	TRPMLs and TPCs: Targets for lysosomal storage and neurodegenerative disease therapy?	2022
35142241	Motor neuron disease in three asymptomatic pVal50Met TTR gene carriers	2022
35139542	Two Beer(s) or Not Two Beer(s): The eNose as an Instrument to Pacify the World	2022
35136957	Different saccadic profile in bulbar versus spinal-onset amyotrophic lateral sclerosis	2023
35134572	Impaired nuclear transport induced by juvenile ALS causing P525L mutation in NLS domain of FUS: A molecular mechanistic study	2022
35120624	Homozygous ALS-linked FUS P525L mutations cell- autonomously perturb transcriptome profile and chemoreceptor signaling in human iPSC microglia	2022
35118923	ALS due to a novel TBK1 mutation in Brazil	2022
35114355	Activation of autophagy attenuates motor deficits and extends lifespan in a C. elegans model of ALS	2022
35112738	Disease-linked TDP-43 hyperphosphorylation suppresses TDP-43 condensation and aggregation	2022
35111203	Genetically Predicted Circulating Concentrations of Micronutrients and Risk of Amyotrophic Lateral Sclerosis: A Mendelian Randomization Study	2022
35102318	Author Correction: Common and rare variant association analyses in amyotrophic lateral sclerosis identify 15 risk loci with distinct genetic architectures and neuron-specific biology	2022
35091648	Structural variation analysis of 6,500 whole genome sequences in amyotrophic lateral sclerosis	2022
35083468	Pathological manifestation of human endogenous retrovirus K in frontotemporal dementia	2021
35076740	Amyotrophic lateral sclerosis with SOD1 mutations shows distinct brain metabolic changes	2022
35069179	Selective and Inverse U-Shaped Curve Alteration of the Retinal Nerve in Amyotrophic Lateral Sclerosis: A Potential Mirror of the Disease	2022
35065969	A copper chaperone-mimetic polytherapy for SOD1-associated amyotrophic lateral sclerosis	2022
35052424	Heterozygous DHTKD1 Variants in Two European Cohorts of Amyotrophic Lateral Sclerosis Patients	2021
35052416	Investigating the Genetic Profile of the Amyotrophic Lateral Sclerosis/Frontotemporal Dementia (ALS-FTD) Continuum in Patients of Diverse Race, Ethnicity and Ancestry	2021
35047667	Revealing the Mutational Spectrum in Southern Africans With Amyotrophic Lateral Sclerosis	2022
35045337	Genome-wide identification of the genetic basis of amyotrophic lateral sclerosis	2022
35045161	Mutation in senataxin alters the mechanism of R-loop resolution in amyotrophic lateral sclerosis 4	2022
35042540	Functional characterisation of the amyotrophic lateral sclerosis risk locus GPX3/TNIP1	2022
35042241	Astrocytes display cell autonomous and diverse early reactive states in familial amyotrophic lateral sclerosis	2022
35039179	Mutation screening of the DNAJC7 gene in Japanese patients with sporadic amyotrophic lateral sclerosis	2022
35034660	Short structural variants as informative genetic markers for ALS disease risk and progression	2022
35028775	A novel homozygous mutation in TBK1 gene causing ALS-FTD	2022
35023098	The Importance of Diagnostic and Prognostic Biomarker Identification and Classification Towards Understanding ALS Pathogenesis	2021
35021275	Novel Variants in the FIG4 Gene Associated With Chinese Sporadic Amyotrophic Lateral Sclerosis With Slow Progression	2022
35020823	The importance of offering early genetic testing in everyone with amyotrophic lateral sclerosis	2022
35020242	Rare variants in TP73 in a frontotemporal dementia cohort link this gene with primary progressive aphasia phenotypes	2022
35016464	Familial amyotrophic lateral sclerosis induced by gene mutation of SOD1G142A: a case report	2021
35007920	Structural brain and spinal cord damage in symptomatic and pre-symptomatic VAPB-related ALS	2022
35002600	A Deletion of the Nuclear Localization Signal Domain in the Fus Protein Induces Stable Post-stress Cytoplasmic Inclusions in SH-SY5Y Cells	2021
34996976	SOD1 mutations associated with amyotrophic lateral sclerosis analysis of variant severity	2022
34994003	One-carbon metabolism pathway genes and their non-association with the development of amyotrophic lateral sclerosis	2022
34985276	Multitarget Hybrid Fasudil Derivatives as a New Approach to the Potential Treatment of Amyotrophic Lateral Sclerosis	2022
34961262	Novel Mutation in the Acetohydroxyacid Synthase (AHAS), Gene Confers Imidazolinone Resistance in Chickpea Cicer arietinum L. Plants	2021
34955704	Assessing Causal Relationship Between Human Blood Metabolites and Five Neurodegenerative Diseases With GWAS Summary Statistics	2021
34953857	Watching liquid droplets of TDP-43(CTD) age by Raman spectroscopy	2022
34951107	Tribenuron-methyl-resistant Descurainia sophia L. exhibits negative cross-resistance to imazethapyr conferred by a Pro197Ser mutation in acetolactate synthase and reduced metabolism	2022
34948065	Sequestosome 1 Is Part of the Interaction Network of VAPB	2021
34946825	Phenoconversion from Spastic Paraplegia to ALS/FTD Associated with CYP7B1 Compound Heterozygous Mutations	2021
34946792	Individual Oligogenic Background in p.D91A-SOD1 Amyotrophic Lateral Sclerosis Patients	2021
34946282	MOBP rs616147 Polymorphism and Risk of Amyotrophic Lateral Sclerosis in a Greek Population: A Case-Control Study	2021
34943155	Computational Insights into the Unfolding of a Destabilized Superoxide Dismutase 1 Mutant	2021
34900230	snpQT: flexible, reproducible, and comprehensive quality control and imputation of genomic data	2021
34934923	Circ-Hdgfrp3 shuttles along neurites and is trapped in aggregates formed by ALS-associated mutant FUS	2021
34931221	Deviation from baseline mutation burden provides powerful and robust rare-variants association test for complex diseases	2022
34929165	An ALS-associated variant of the autophagy receptor SQSTM1/p62 reprograms binding selectivity toward the autophagy-related hATG8 proteins	2022
34926946	Delineating the Aggregation-Prone Hotspot Regions (Peptides) in the Human Cu/Zn Superoxide Dismutase 1	2021
34926808	Homozygous SOD1 Variation L144S Produces a Severe Form of Amyotrophic Lateral Sclerosis in an Iranian Family	2021
34917136	A Novel Mutation (D395A) in Valosin-Containing Protein Gene Is Associated With Early Onset Frontotemporal Dementia in an Italian Family	2021
34906191	Leukocyte telomere length and amyotrophic lateral sclerosis: a Mendelian randomization study	2021
34873335	Common and rare variant association analyses in amyotrophic lateral sclerosis identify 15 risk loci with distinct genetic architectures and neuron-specific biology	2021
34871763	Inflammation-dependent oxidative stress metabolites as a hallmark of amyotrophic lateral sclerosis	2022
34869374	Methylation and Expression of Mutant FUS in Motor Neurons Differentiated From Induced Pluripotent Stem Cells From ALS Patients	2021
34869330	Formation of Cytoplasmic Actin-Cofilin Rods is Triggered by Metabolic Stress and Changes in Cellular pH	2021
34868265	Missense Mutations of Codon 116 in the SOD1 Gene Cause Rapid Progressive Familial ALS and Predict Short Viability With PMA Phenotype	2021
34868212	Rare CYLD Variants in Chinese Patients With Amyotrophic Lateral Sclerosis	2021
34853325	The effects of molecular crowding and CpG hypermethylation on DNA G-quadruplexes formed by the C9orf72 nucleotide repeat expansion	2021
34853179	Amyotrophic Lateral Sclerosis-Frontotemporal Dementia: Shared and Divergent Neural Correlates Across the Clinical Spectrum	2021
34849577	Focused goodness of fit tests for gene set analyses	2022
34841512	Novel TBK1 variant associated with Frontotemporal Dementia overlap syndrome	2022
34828447	Target-Site Mutations and Expression of ALS Gene Copies Vary According to Echinochloa Species	2021
34827542	Epigenetic Small Molecules Rescue Nucleocytoplasmic Transport and DNA Damage Phenotypes in C9ORF72 ALS/FTD	2021
34823435	A Brazilian multicentre study on the clinical and epidemiological profiles of 1116 patients with amyotrophic lateral sclerosis and its phenotypic variants	2022
34805999	Tackling clinical heterogeneity across the amyotrophic lateral sclerosis-frontotemporal dementia spectrum using a transdiagnostic approach	2021
34803609	Mutant Cu/Zn Superoxide Dismutase (A4V) Turnover Is Altered in Cells Containing Inclusions	2021
34802535	Target site mutations and cytochrome P450s-involved metabolism confer resistance to nicosulfuron in green foxtail (Setaria viridis)	2021
34800171	TBK1 haploinsufficiency results in changes in the K63-ubiquitination profiles in brain and fibroblasts from affected and presymptomatic mutation carriers	2022
34796871	Enrichment of SARM1 alleles encoding variants with constitutively hyperactive NADase in patients with ALS and other motor nerve disorders	2021
34788402	Infantile SOD1 deficiency syndrome caused by a homozygous SOD1 variant with absence of enzyme activity	2022
34788013	Trichostatin A Relieves Growth Suppression and Restores Histone Acetylation at Specific Sites in a FUS ALS/FTD Yeast Model	2021
34787357	Specific RNA interactions promote TDP-43 multivalent phase separation and maintain liquid properties	2021
34783967	(1)H, (13)C and (15)N resonance assignments and solution structures of the two RRM domains of Matrin-3	2022
34779964	An immigrant family with Kii amyotrophic lateral sclerosis/parkinsonism-dementia complex	2022
34779525	A Novel TFG Mutation in a Korean Family with α-Synucleinopathy and Amyotrophic Lateral Sclerosis	2022
34779076	Novel genetic variants in MAPT and alterations in tau phosphorylation in amyotrophic lateral sclerosis post-mortem motor cortex and cerebrospinal fluid	2022
34774801	Phase-separated protein droplets of amyotrophic lateral sclerosis-associated p62/SQSTM1 mutants show reduced inner fluidity	2021
34773059	A selectable all-in-one CRISPR prime editing piggyBac transposon allows for highly efficient gene editing in human cell lines	2021
34764380	Neurofilaments can differentiate ALS subgroups and ALS from common diagnostic mimics	2021
34751056	Juvenile amyotrophic lateral sclerosis associated with biallelic c.757delG mutation of sorbitol dehydrogenase gene	2022
34750982	Amyotrophic lateral sclerosis (ALS) linked mutation in Ubiquilin 2 affects stress granule assembly via TIA-1	2022
34748676	Epidemiology and survival trends of motor neurone disease in Northern Ireland from 2015 to 2019	2022
34746377	Genetic and Functional Analysis of Glycosyltransferase 8 Domain-Containing Protein 1 in Taiwanese Patients With Amyotrophic Lateral Sclerosis	2021
34746121	Aberrant Phase Separation of FUS Leads to Lysosome Sequestering and Acidification	2021
34732726	Gain-of-function cardiomyopathic mutations in RBM20 rewire splicing regulation and re-distribute ribonucleoprotein granules within processing bodies	2021
34728328	SOD1 mutations cause hypersensitivity to high-pressure-induced oxidative stress in Saccharomyces cerevisiae	2022
34726688	CHMP2B regulates TDP-43 phosphorylation and cytotoxicity independent of autophagy via CK1	2022
34723963	A behavioral screen for mediators of age-dependent TDP-43 neurodegeneration identifies SF2/SRSF1 among a group of potent suppressors in both neurons and glia	2021
34721532	SOD1 Mutation Spectrum and Natural History of ALS Patients in a 15-Year Cohort in Southeastern China	2021
34708205	SCFD1 expression quantitative trait loci in amyotrophic lateral sclerosis are differentially expressed	2021
34707478	Potential Common Genetic Risks of Sporadic Parkinson's Disease and Amyotrophic Lateral Sclerosis in the Han Population of Mainland China	2021
34694630	Myelin-associated oligodendrocyte basic protein rs616147 polymorphism as a risk factor for Parkinson's disease	2022
34693637	A122S, A205V, D376E, W574L and S653N substitutions in acetolactate synthase (ALS) from Amaranthus palmeri show different functional impacts on herbicide resistance	2022
34693290	Unilateral vocal cord adductor weakness: an atypical manifestation of motor neurone disease	2021
34693284	Evidence for GRN connecting multiple neurodegenerative diseases	2021
34691149	Assessing the Causal Role of Selenium in Amyotrophic Lateral Sclerosis: A Mendelian Randomization Study	2021
34686150	Disease duration of progression is helpful in identifying isolated bulbar palsy of amyotrophic lateral sclerosis	2021
34681673	m(6)A Modified Short RNA Fragments Inhibit Cytoplasmic TLS/FUS Aggregation Induced by Hyperosmotic Stress	2021
34680939	A Novel Variant in Superoxide Dismutase 1 Gene (p.V119M) in Als Patients with Pure Lower Motor Neuron Presentation	2021
34677606	Preventing amyotrophic lateral sclerosis: insights from pre-symptomatic neurodegenerative diseases	2022
34676447	Involvement of cortico-efferent tracts in flail arm syndrome: a tract-of-interest-based DTI study	2022
34669638	Induced pluripotent stem cell-derived motor neurons from amyotrophic lateral sclerosis (ALS) patients carrying different superoxide dismutase 1 mutations recapitulate pathological features of ALS	2021
34668453	Compound heterozygous P67S/D91A SOD1 mutations in an ALS family with apparently sporadic case	2022
34667101	Phenotyping of the thoracic-onset variant of amyotrophic lateral sclerosis	2022
34665352	Duplication of exons 15 and 16 in Matrin-3: a phenotype bridging amyotrophic lateral sclerosis and immune-mediated disorders	2022
34660586	Human Induced Pluripotent Stem Cell-Derived TDP-43 Mutant Neurons Exhibit Consistent Functional Phenotypes Across Multiple Gene Edited Lines Despite Transcriptomic and Splicing Discrepancies	2021
34659083	Case Report: Laryngospasm as Initial Manifestation of Amyotrophic Lateral Sclerosis in a Long-Survival Patient With Heterozygous p.D90A - SOD1 Mutation	2021
34654821	A C. elegans model of C9orf72-associated ALS/FTD uncovers a conserved role for eIF2D in RAN translation	2021
34654750	The low-complexity domain of the FUS RNA binding protein self-assembles via the mutually exclusive use of two distinct cross-β cores	2021
34653813	Computer analysis of the relation between hydrogen bond stability in SOD1 mutants and the survival time of amyotrophic lateral sclerosis patients	2022
34648767	The Sigma-1 receptor is an ER-localized type II membrane protein	2021
34638725	C9ORF72 Repeat Expansion Affects the Proteome of Primary Skin Fibroblasts in ALS	2021
34624313	ALS-linked FUS mutations dysregulate G-quadruplex-dependent liquid-liquid phase separation and liquid-to-solid transition	2021
34623592	Influence of GSTP1 rs1695 polymorphism on survival in male patients' amyotrophic lateral sclerosis: a genetic association study in Brazilian population	2022
34618203	Nuclear depletion of RNA-binding protein ELAVL3 (HuC) in sporadic and familial amyotrophic lateral sclerosis	2021
34616013	SOD1 D91A variant in the southernmost tip of Europe: a heterozygous ALS patient resident on the island of Gozo	2022
34615428	An identical DCTN1 mutation in two Chinese siblings manifest as dHMN and ALS respectively: a case report	2022
34605896	FUS-induced neurotoxicity is prevented by inhibiting GSK-3β in a Drosophila model of amyotrophic lateral sclerosis	2022
34590699	Loss of Elp1 perturbs histone H2A.Z and the Notch signaling pathway	2021
34589746	Amyotrophic lateral sclerosis in a patient who recovered from Miller Fisher Syndrome: The role of GQ1b antibody revisited	2021
34587215	Molecular dynamics and protein frustration analysis of human fused in Sarcoma protein variants in Amyotrophic Lateral Sclerosis type 6: An In Silico approach	2021
34584092	Contribution of rare variant associations to neurodegenerative disease presentation	2021
34583942	GBA variants influence cognitive status in amyotrophic lateral sclerosis	2022
34576228	Dimerization of Human Angiogenin and of Variants Involved in Neurodegenerative Diseases	2021
34573259	Genotyping and Plasma/Cerebrospinal Fluid Profiling of a Cohort of Frontotemporal Dementia-Amyotrophic Lateral Sclerosis Patients	2021
34568776	A single copy transgenic mutant FUS strain reproduces age-dependent ALS phenotypes in C. elegans	2021
34568457	γ' Fibrinogen as a Predictor of Survival in Amyotrophic Lateral Sclerosis	2021
34564799	Genetic analysis in Chinese patients with familial or young-onset amyotrophic lateral sclerosis	2022
34558160	Amino acid substitution (Gly-654-Tyr) in acetolactate synthase (ALS) confers broad spectrum resistance to ALS-inhibiting herbicides	2022
34548578	TDP-43 regulates GAD1 mRNA splicing and GABA signaling in Drosophila CNS	2021
34544842	Role of genetics in amyotrophic lateral sclerosis: a large cohort study in Chinese mainland population	2022
34540798	Bridging the Bridging Imidazolate in the Bimetallic Center of the Cu/Zn SOD1 and ALS	2021
34539336	Dysregulation in Subcellular Localization of Myelin Basic Protein mRNA Does Not Result in Altered Myelination in Amyotrophic Lateral Sclerosis	2021
34536826	Novel monoallelic variant in ERLIN2 causes spastic paraplegia converted to amyotrophic lateral sclerosis	2021
34536489	A new strategy to increase RNA editing at the Q/R site of GluA2 AMPA receptor subunits by targeting alternative splicing patterns of ADAR2	2021
34526879	Presenilin-1 Mutations Are a Cause of Primary Lateral Sclerosis-Like Syndrome	2021
34520757	AAA+ ATPase p97/VCP mutants and inhibitor binding disrupt inter-domain coupling and subsequent allosteric activation	2021
34518945	FUS mutations dominate TBK1 mutations in FUS/TBK1 double-mutant ALS/FTD pedigrees	2022
34518333	De novo mutations in SOD1 are a cause of ALS	2022
34511133	Sequencing of neurofilament genes identified NEFH Ser787Arg as a novel risk variant of sporadic amyotrophic lateral sclerosis in Chinese subjects	2021
34503963	Brain Stem Glucose Hypermetabolism in Amyotrophic Lateral Sclerosis/Frontotemporal Dementia and Shortened Survival: An (18)F-FDG PET/MRI Study	2022
34500068	A streamlined CRISPR workflow to introduce mutations and generate isogenic iPSCs for modeling amyotrophic lateral sclerosis	2022
34499080	Phase separation and toxicity of C9orf72 poly(PR) depends on alternate distribution of arginine	2021
34496257	Persistent mRNA localization defects and cell death in ALS neurons caused by transient cellular stress	2021
34484296	Growth Differentiation Factor 15 Is Associated With Alzheimer's Disease Risk	2021
34479984	Biallelic ADPRHL2 mutations in complex neuropathy affect ADP ribosylation and DNA damage response	2021
34479069	Generation and characterization of an endogenously tagged SPG11-human iPSC line by CRISPR/Cas9 mediated knock-in	2021
34475430	Protein disulphide isomerase (PDI) is protective against amyotrophic lateral sclerosis (ALS)-related mutant Fused in Sarcoma (FUS) in in vitro models	2021
34475377	Genome-wide association study of frontotemporal dementia identifies a C9ORF72 haplotype with a median of 12-G4C2 repeats that predisposes to pathological repeat expansions	2021
34467855	The dual role of amyloid-β-sheet sequences in the cell surface properties of FLO11-encoded flocculins in Saccharomyces cerevisiae	2021
34462365	Correction for Wu et al., ALS/FTD mutations in UBQLN2 impede autophagy by reducing autophagosome acidification through loss of function	2021
34459874	Association of Variants in the SPTLC1 Gene With Juvenile Amyotrophic Lateral Sclerosis	2021
34445060	Genetically Predicted Milk Intake and Risk of Neurodegenerative Diseases	2021
34440384	C9orf72-G(4)C(2) Intermediate Repeats and Parkinson's Disease; A Data-Driven Hypothesis	2021
34440152	Small Hexokinase 1 Peptide against Toxic SOD1 G93A Mitochondrial Accumulation in ALS Rescues the ATP-Related Respiration	2021
34439885	Exosome microRNAs in Amyotrophic Lateral Sclerosis: A Pilot Study	2021
34431456	Genotype-phenotype correlations in a chinese population with familial amyotrophic lateral sclerosis	2022
34429846	New structural variations responsible for Charcot-Marie-Tooth disease: The first two large KIF5A deletions detected by CovCopCan software	2021
34429248	Niclosamide affects intracellular TDP-43 distribution in motor neurons, activates mitophagy, and attenuates morphological changes under stress	2021
34424253	Measuring Glucose Uptake in Drosophila Models of TDP-43 Proteinopathy	2021
34421992	The rs2619566, rs10260404, and rs79609816 Polymorphisms Are Associated With Sporadic Amyotrophic Lateral Sclerosis in Individuals of Han Ancestry From Mainland China	2021
34421665	Commentary on Singh et al. (2020) Postzygotic Somatic Mutations in the Human Brain Expand the Threshold-Liability Model of Schizophrenia	2021
34404558	Mutation analysis of SOD1, C9orf72, TARDBP and FUS genes in ethnically-diverse Malaysian patients with amyotrophic lateral sclerosis (ALS)	2021
34397416	A Novel Genetic Marker for the C9orf72 Repeat Expansion in the Finnish Population	2021
34396115	TDP-43 and FUS mislocalization in VCP mutant motor neurons is reversed by pharmacological inhibition of the VCP D2 ATPase domain	2021
34391803	Sequence Determinants of the Aggregation of Proteins Within Condensates Generated by Liquid-liquid Phase Separation	2022
34386583	Amyotrophic Lateral Sclerosis Genetic Access Program: Paving the Way for Genetic Characterization of ALS in the Clinic	2021
34382491	Genetic and epigenetic disease modifiers in an Italian C9orf72 family expressing ALS, FTD or PD clinical phenotypes	2022
34380534	Progressive spastic tetraplegia and axial hypotonia (STAHP) due to SOD1 deficiency: is it really a new entity?	2021
34380047	TDP-43 condensation properties specify its RNA-binding and regulatory repertoire	2021
34379621	Prognosis of amyotrophic lateral sclerosis with cognitive and behavioural changes based on a sixty-month longitudinal follow-up	2021
34375640	Fused in sarcoma regulates DNA replication timing and kinetics	2021
34362895	Human sensorimotor organoids derived from healthy and amyotrophic lateral sclerosis stem cells form neuromuscular junctions	2021
34362180	Minor Allele Frequencies and Molecular Pathways Differences for SNPs Associated with Amyotrophic Lateral Sclerosis in Subjects Participating in the UKBB and 1000 Genomes Project	2021
34360842	Structural and Functional Analysis of Disease-Linked p97 ATPase Mutant Complexes	2021
34358737	Adult height and long-term outcomes after rhIGF-1 therapy in two patients with PAPP-A2 deficiency	2021
34354735	Cohort Analysis of 67 Charcot-Marie-Tooth Italian Patients: Identification of New Mutations and Broadening of Phenotype Expression Produced by Rare Variants	2021
34343861	Confirmation of early non-bulbar onset of amyotrophic lateral sclerosis in Spanish league soccer players	2021
34339840	Phosphorylated TAR DNA-binding protein-43: Aggregation and antibody-based inhibition	2021
34333853	Genetic and clinical features of Chinese sporadic amyotrophic lateral sclerosis patients with TARDBP mutations	2021
34325980	Towards personalized medicine for amyotrophic lateral sclerosis	2021
34322776	IGF1R, IGFALS, and IGFBP3 gene copy number variations in a group of non-syndromic Egyptian short children	2021
34318620	Humoral response to neurofilaments and dipeptide repeats in ALS progression	2021
34313343	Sex-specific and caste-specific brain adaptations related to spatial orientation in Cataglyphis ants	2021
34311603	Glutathione S-transferase Omega 2 DD genotype is associated with an increased risk of sporadic amyotrophic lateral sclerosis in Chinese men	2021
34311139	Increased telomere length in patients with frontotemporal dementia syndrome	2021
34310943	Transcriptome analysis using patient iPSC-derived skeletal myocytes: Bet1L as a new molecule possibly linked to neuromuscular junction degeneration in ALS	2021
34310938	Disease-associated mutations affect TIA1 phase separation and aggregation in a proline-dependent manner	2021
34303285	Generation of an induced pluripotent stem cell line (UCSCi001-A) from a patient with early-onset amyotrophic lateral sclerosis carrying a FUS variant	2021
34302583	Detection of structural and conformational changes in ALS-causing mutant profilin-1 with hydrogen/deuterium exchange mass spectrometry and bioinformatics techniques	2022
34291734	Characterization of HNRNPA1 mutations defines diversity in pathogenic mechanisms and clinical presentation	2021
34290285	Rapid in vitro quantification of TDP-43 and FUS mislocalisation for screening of gene variants implicated in frontotemporal dementia and amyotrophic lateral sclerosis	2021
34288034	Splicing factor proline and glutamine rich intron retention, reduced expression and aggregate formation are pathological features of amyotrophic lateral sclerosis	2021
34279165	Association of apolipoprotein E ε4 allele and amyotrophic lateral sclerosis in Chinese population	2022
34275688	Mutation spectrum of amyotrophic lateral sclerosis in Central South China	2021
34272080	A recessive S174X mutation in Optineurin causes amyotrophic lateral sclerosis through a loss of function via allele-specific nonsense-mediated decay	2021
34270808	Gene expression shapes the patterns of parallel evolution of herbicide resistance in the agricultural weed Monochoria vaginalis	2021
34258561	The optineurin/TIA1 pathway inhibits aberrant stress granule formation and reduces ubiquitinated TDP-43	2021
34254495	A rare case of juvenile amyotrophic lateral sclerosis	2021
34253421	Prove pathogenicity of OPTN variants before establishing a causal relation with amyotrophic lateral sclerosis	2021
34233860	Validation of the pathogenic role of rare DNAJC7 variants in Chinese patients with amyotrophic lateral sclerosis	2021
34220673	Two Distinct Clinical Phenotypes of Bulbar Motor Impairment in Amyotrophic Lateral Sclerosis	2021
34218510	Differential expression of genes associated with non-target site resistance in Poa annua with target site resistance to acetolactate synthase inhibitors	2021
34214939	A distant angiogenin variant causes amyotrophic lateral sclerosis through loss-of-function mechanisms: Insights from long-timescale atomistic simulations and conformational dynamics	2021
34210210	Thr124Met myelin protein zero mutation mimicking motor neuron disease	2022
34209673	C9orf72 Intermediate Repeats Confer Genetic Risk for Severe COVID-19 Pneumonia Independently of Age	2021
34194442	Genetic Analysis of Tryptophan Metabolism Genes in Sporadic Amyotrophic Lateral Sclerosis	2021
34194383	TDP-43 and Phosphorylated TDP-43 Levels in Paired Plasma and CSF Samples in Amyotrophic Lateral Sclerosis	2021
34193962	Identification of a novel interaction of FUS and syntaphilin may explain synaptic and mitochondrial abnormalities caused by ALS mutations	2021
34188235	TP73 variants implicate apoptosis in amyotrophic lateral sclerosis pathogenesis	2021
34183068	Correction to: A novel splicing variant of ANXA11 in a patient with amyotrophic lateral sclerosis: histologic and biochemical features	2021
34179866	Repeats expansions in ATXN2, NOP56, NIPA1 and ATXN1 are not associated with ALS in Africans	2021
34175147	Novel TARDBP missense mutation caused familial amyotrophic lateral sclerosis with frontotemporal dementia and parkinsonism	2021
34169147	Novel TUBA4A Variant Associated With Familial Frontotemporal Dementia	2021
34169068	TDP-43 Mutation Affects Stress Granule Dynamics in Differentiated NSC-34 Motoneuron-Like Cells	2021
34168085	Genotype-associated cerebellar profiles in ALS: focal cerebellar pathology and cerebro-cerebellar connectivity alterations	2021
34166783	In vitro evidence of propagation of superoxide dismutase-1 protein aggregation in canine degenerative myelopathy	2021
34160014	CRISPR/Cas9-engineered Drosophila knock-in models to study VCP diseases	2021
34152475	TMEM106B modifies TDP-43 pathology in human ALS brain and cell-based models of TDP-43 proteinopathy	2021
34149599	Case Report: Cognitive Conversion in a Non-brazilian VAPB Mutation Carrier (ALS8)	2021
34145292	Structural basis for the ARF GAP activity and specificity of the C9orf72 complex	2021
34138531	Ligand-Induced Stabilization of the Native Human Superoxide Dismutase 1	2021
34135078	Pathogenic effect of TP73 Gene Variants in People With Amyotrophic Lateral Sclerosis	2021
34133922	Stress granules inhibit fatty acid oxidation by modulating mitochondrial permeability	2021
34133501	The history behind ALS type 8: from the first phenotype description to the discovery of VAPB mutation	2021
34131277	Establishment of chemically oligomerizable TAR DNA-binding protein-43 which mimics amyotrophic lateral sclerosis pathology in mammalian cells	2021
34129687	ALS-linked mutations impair UBQLN2 stress-induced biomolecular condensate assembly in cells	2021
34129120	Mitochondrial genome variations are associated with amyotrophic lateral sclerosis in patients from mainland China	2022
34118419	Family-based exome sequencing identifies RBM45 as a possible candidate gene for frontotemporal dementia and amyotrophic lateral sclerosis	2021
34115705	18F-THK5351 PET Can Identify Core Lesions in Different Amyotrophic Lateral Sclerosis Phenotypes	2021
34110677	Familial clustering of primary lateral sclerosis and amyotrophic lateral sclerosis: Supplementary evidence for a continuum	2021
34109652	Exploring the molecular basis of UG-rich RNA recognition by the human splicing factor TDP-43 using molecular dynamics simulation and free energy calculation	2021
34107252	Human amyotrophic lateral sclerosis excitability phenotype screen: Target discovery and validation	2021
34107054	Phosphorylation of trans-active response DNA-binding protein-of 43 kDa promotes its cytoplasmic aggregation and modulates its function in tau mRNA stability and exon 10 alternative splicing	2021
34099552	ALS- and FTD-associated missense mutations in TBK1 differentially disrupt mitophagy	2021
34099057	A novel splicing variant of ANXA11 in a patient with amyotrophic lateral sclerosis: histologic and biochemical features	2021
34093394	Novel Optineurin Frameshift Insertion in a Family With Frontotemporal Dementia and Parkinsonism Without Amyotrophic Lateral Sclerosis	2021
34088960	ALS-linked FUS mutants affect the localization of U7 snRNP and replication-dependent histone gene expression in human cells	2021
34087986	Generation of an induced pluripotent stem cell line (CSS012-A (7672)) carrying the p.G376D heterozygous mutation in the TARDBP protein	2021
34076319	Free energy calculations of ALS-causing SOD1 mutants reveal common perturbations to stability and dynamics along the maturation pathway	2021
34075589	Tocilizumab is safe and tolerable and reduces C-reactive protein concentrations in the plasma and cerebrospinal fluid of ALS patients	2021
34074767	ALS-linked PFN1 variants exhibit loss and gain of functions in the context of formin-induced actin polymerization	2021
34074186	A case of juvenile-onset amyotrophic lateral sclerosis with a de novo frameshift FUS gene mutation presenting with bilateral abducens palsy	2022
34068231	eIF3a Destabilization and TDP-43 Alter Dynamics of Heat-Induced Stress Granules	2021
34067277	A Synthetic SOD/Catalase Mimic Compound for the Treatment of ALS	2021
34061233	DDX17 is involved in DNA damage repair and modifies FUS toxicity in an RGG-domain dependent manner	2021
34059832	Interactions between ALS-linked FUS and nucleoporins are associated with defects in the nucleocytoplasmic transport pathway	2021
34059824	Childhood amyotrophic lateral sclerosis caused by excess sphingolipid synthesis	2021
34051439	Physical exercise is a risk factor for amyotrophic lateral sclerosis: Convergent evidence from Mendelian randomisation, transcriptomics and risk genotypes	2021
34048688	Reduced PHOX2B stability causes axonal growth impairment in motor neurons with TARDBP mutations	2021
34048612	A Novel Multisystem Proteinopathy Caused by a Missense ANXA11 Variant	2021
34046259	Trp-574-Leu mutation in wild mustard (Sinapis arvensis L.) as a result of als inhibiting herbicide applications	2021
34025336	Mutation Screening of the GLE1 Gene in a Large Chinese Cohort of Amyotrophic Lateral Sclerosis Patients	2021
34017912	Occurrence of Amyotrophic Lateral Sclerosis in Type 1 Gaucher Disease	2021
33999292	Identification of a novel mutation in MEF2C gene in an atypical patient with frontotemporal lobar degeneration	2022
33987464	Possible Somatic Mosaicism of Novel FUS Variant in Familial Amyotrophic Lateral Sclerosis	2021
33986643	Unbiased Label-Free Quantitative Proteomics of Cells Expressing Amyotrophic Lateral Sclerosis (ALS) Mutations in CCNF Reveals Activation of the Apoptosis Pathway: A Workflow to Screen Pathogenic Gene Mutations	2021
33983668	Validation of The Edinburgh cognitive and behavioural ALS screen (ECAS) in behavioural variant frontotemporal dementia and Alzheimer's disease	2021
33983551	Infratentorial pathology in frontotemporal dementia: cerebellar grey and white matter alterations in FTD phenotypes	2021
33970128	Detection of Protein Aggregation using Fluorescence Correlation Spectroscopy	2021
33967699	Altered Phase Separation and Cellular Impact in C9orf72-Linked ALS/FTD	2021
33962819	Authors' reply: Four novel optineurin mutations in patients with sporadic amyotrophic lateral sclerosis in Mainland China	2021
33959917	Generation of Cortical, Dopaminergic, Motor, and Sensory Neurons from Human Pluripotent Stem Cells	2022
33951500	Conformational stabilization of optineurin by the dynamic interaction of linear polyubiquitin	2021
33926081	Supramolecular Polymorphism of (G(4)C(2))(n) Repeats Associated with ALS and FTD	2021
33924373	DCTN1 Binds to TDP-43 and Regulates TDP-43 Aggregation	2021
33919255	Impaired 26S Proteasome Assembly Precedes Neuronal Loss in Mutant UBQLN2 Rats	2021
33913039	LRP10 interacts with SORL1 in the intracellular vesicle trafficking pathway in non-neuronal brain cells and localises to Lewy bodies in Parkinson's disease and dementia with Lewy bodies	2021
33906934	Extensive heterogeneity in patients with ALS with mutations in SOD1 in France	2021
33894192	Associations between lifestyle and amyotrophic lateral sclerosis stratified by C9orf72 genotype: a longitudinal, population-based, case-control study	2021
33892821	Combined epigenetic/genetic study identified an ALS age of onset modifier	2021
33891869	Human motor units in microfluidic devices are impaired by FUS mutations and improved by HDAC6 inhibition	2021
33879000	A novel splice site FUS mutation in a familial ALS case: effects on protein expression	2022
33876209	14q32 rearrangements deregulating BCL11B mark a distinct subgroup of T-lymphoid and myeloid immature acute leukemia	2021
33875291	Assessment of ANG variants in Parkinson's disease	2021
33871294	Epidemiological and genetic features of amyotrophic lateral sclerosis in Latin America and the Caribbean: a systematic review	2022
33871026	A serum microRNA sequence reveals fragile X protein pathology in amyotrophic lateral sclerosis	2021
33868328	Point Mutations as Main Resistance Mechanism Together With P450-Based Metabolism Confer Broad Resistance to Different ALS-Inhibiting Herbicides in Glebionis coronaria From Tunisia	2021
33860706	Slow progression of amyotrophic lateral sclerosis in a Chinese patient carrying SOD1 p.S135T mutation	2022
33855783	O-GlcNAcylation of TDP-43 suppresses proteinopathies and promotes TDP-43's mRNA splicing activity	2021
33850086	Identification of Rpd3 as a novel epigenetic regulator of Drosophila FIG 4, a Charcot-Marie-Tooth disease-causing gene	2021
33841129	Novel STMN2 Variant Linked to Amyotrophic Lateral Sclerosis Risk and Clinical Phenotype	2021
33837088	C9orf72-derived arginine-containing dipeptide repeats associate with axonal transport machinery and impede microtubule-based motility	2021
33833668	Hypothesis and Theory: Roles of Arginine Methylation in C9orf72-Mediated ALS and FTD	2021
33829936	Genotype-phenotype correlations of KIF5A stalk domain variants	2021
33826063	Lack of association between TREM2 rs75932628 variant and amyotrophic lateral sclerosis	2021
33818195	Early juvenile reading epilepsy and later frontotemporal dementia (FTD): expanding the clinical phenotype of C9ORF72 mutation?	2022
33809961	An Integrative Transcriptome-Wide Analysis of Amyotrophic Lateral Sclerosis for the Identification of Potential Genetic Markers and Drug Candidates	2021
33809456	Molecular Alterations in Sporadic and SOD1-ALS Immortalized Lymphocytes: Towards a Personalized Therapy	2021
33799476	A Nation-Wide, Multi-Center Study on the Quality of Life of ALS Patients in Germany	2021
33792567	ALS-associated mutation FUS-R521C causes DNA damage and RNA splicing defects	2021
33785574	Impact of a frequent nearsplice SOD1 variant in amyotrophic lateral sclerosis: optimising SOD1 genetic screening for gene therapy opportunities	2021
33783499	C9orf72-associated arginine-rich dipeptide repeats induce RNA-dependent nuclear accumulation of Staufen in neurons	2021
33780440	Characterization of C9orf72 haplotypes to evaluate the effects of normal and pathological variations on its expression and splicing	2021
33772006	TDP-43 and PINK1 mediate CHCHD10(S59L) mutation-induced defects in Drosophila and in vitro	2021
33770234	Targeted sequencing panels in Italian ALS patients support different etiologies in the ALS/FTD continuum	2021
33767237	In silico studies reveal structural deviations of mutant profilin-1 and interaction with riluzole and edaravone in amyotrophic lateral sclerosis	2021
33760283	An autopsy case of pure nigropathy with TUBA4A nonsense mutation	2021
33754899	SOD1-related ALS with anticipation in a large family from Martinique	2021
33749723	Multi-OMICS study of a CHCHD10 variant causing ALS demonstrates metabolic rewiring and activation of endoplasmic reticulum and mitochondrial unfolded protein responses	2021
33747043	Iron Status May Not Affect Amyotrophic Lateral Sclerosis: A Mendelian Randomization Study	2021
33737206	Learning dynamic Bayesian networks from time-dependent and time-independent data: Unraveling disease progression in Amyotrophic Lateral Sclerosis	2021
33729478	ALS/FTD-causing mutation in cyclin F causes the dysregulation of SFPQ	2021
33727253	Isolated homozygous R217X OPTN mutation causes knock-out of functional C-terminal optineurin domains and associated oligodendrogliopathy-dominant ALS-TDP	2021
33714647	GLT8D1 may not be significant in Chinese sporadic amyotrophic lateral sclerosis patients	2021
33712624	Cryo-EM structure of amyloid fibrils formed by the entire low complexity domain of TDP-43	2021
33709219	Eye movement alterations in presymptomatic C9orf72 expansion gene carriers	2021
33709015	A Human-Based Functional NMJ System for Personalized ALS Modeling and Drug Testing	2020
33705755	Unusual RNA binding of FUS RRM studied by molecular dynamics simulation and enhanced sampling method	2021
33694180	HDAC6 inhibition restores TDP-43 pathology and axonal transport defects in human motor neurons with TARDBP mutations	2021
33693641	Aberrant cytoplasmic intron retention is a blueprint for RNA binding protein mislocalization in VCP-related amyotrophic lateral sclerosis	2021
33692125	S-nitrosylated TDP-43 triggers aggregation, cell-to-cell spread, and neurotoxicity in hiPSCs and in vivo models of ALS/FTD	2021
33683284	ALS2 regulates endosomal trafficking, postsynaptic development, and neuronal survival	2021
33679289	A Novel SOD1 Intermediate Oligomer, Role of Free Thiols and Disulfide Exchange	2021
33677640	A knockout mutation associated with juvenile paroxysmal dyskinesia in Markiesje dogs indicates SOD1 pleiotropy	2021
33670886	The ALS-Associated FUS (P525L) Variant Does Not Directly Interfere with Microtubule-Dependent Kinesin-1 Motility	2021
33670299	Dysregulations of Expression of Genes of the Ubiquitin/SUMO Pathways in an In Vitro Model of Amyotrophic Lateral Sclerosis Combining Oxidative Stress and SOD1 Gene Mutation	2021
33663561	Altered network properties in C9ORF72 repeat expansion cortical neurons are due to synaptic dysfunction	2021
33661518	Chemical chaperones targeted to the endoplasmic reticulum (ER) and lysosome prevented neurodegeneration in a C9orf72 repeat expansion drosophila amyotrophic lateral sclerosis (ALS) model	2021
33661429	Evidence of synergism among three genetic variants in a patient with LMNA-related lipodystrophy and amyotrophic lateral sclerosis leading to a remarkable nuclear phenotype	2021
33659560	High-throughput Flow Cytometry Assay to Investigate TDP43 Splicing Function	2020
33655811	The palmomental reflex in amyotrophic lateral sclerosis - a clinical sign of executive or motor dysfunction?	2021
33650927	Sandhoff disease in the elderly: a case study	2022
33646993	Creutzfeldt-Jakob Disease May Present Early With Unusual Bulbar Predominance	2021
33637635	Natural History of "Pure" Primary Lateral Sclerosis	2021
33637330	The heterozygous deletion c.1509_1510delAG in exon 14 of FUS causes an aggressive childhood-onset ALS with cognitive impairment	2021
33631029	Population structure and evolution of resistance to acetolactate synthase (ALS)-inhibitors in Amaranthus tuberculatus in Italy	2021
33630959	Comprehensive in silico analysis and molecular dynamics of the superoxide dismutase 1 (SOD1) variants related to amyotrophic lateral sclerosis	2021
33625581	Phenotypic and molecular diversities of spinocerebellar ataxia type 2 in Japan	2021
33618928	Genetic epidemiology of familial ALS in Brazil	2021
33613607	Target-Site and Non-target-Site Resistance Mechanisms Confer Multiple and Cross- Resistance to ALS and ACCase Inhibiting Herbicides in Lolium rigidum From Spain	2021
33610019	Generation of six induced pluripotent stem cell lines from patients with amyotrophic lateral sclerosis with associated genetic mutations in either FUS or ANXA11	2021
33606765	No association of GSTP1 rs1695 polymorphism with amyotrophic lateral sclerosis: A case-control study in the Brazilian population	2021
33604048	D-amino acid oxidase (DAO) rare genetic missense variant p.Pro103Leu and gastric cancer	2021
33602013	The clinical spectrum of primary lateral sclerosis	2020
33602012	Genetics of primary lateral sclerosis	2020
33601107	Genetic characterization of a cohort with familial parkinsonism and cognitive-behavioral syndrome: A Next Generation Sequencing study	2021
33589474	Value of systematic genetic screening of patients with amyotrophic lateral sclerosis	2021
33587281	Regional prefrontal cortical atrophy predicts specific cognitive-behavioral symptoms in ALS-FTD	2021
33581934	Genetic analysis of GLT8D1 and ARPP21 in Australian familial and sporadic amyotrophic lateral sclerosis	2021
33581933	Mutation screening and burden analysis of GLT8D1 in Chinese patients with amyotrophic lateral sclerosis	2021
33580145	Mechanism of karyopherin-β2 binding and nuclear import of ALS variants FUS(P525L) and FUS(R495X)	2021
33576252	Chitotriosidase as biomarker for early stage amyotrophic lateral sclerosis: a multicenter study	2021
33576076	Cognitive decline in amyotrophic lateral sclerosis: Neuropathological substrate and genetic determinants	2021
33557921	Inhibition of Ref(2)P, the Drosophila homologue of the p62/SQSTM1 gene, increases lifespan and leads to a decline in motor function	2021
33553758	Structural effects of stabilization and complexation of a zinc-deficient superoxide dismutase	2021
33553704	Basilar invagination: A mimicker of bulbar-onset amyotrophic lateral sclerosis	2021
33548116	A glaucoma- and ALS-associated mutant of OPTN induces neuronal cell death dependent on Tbk1 activity, autophagy and ER stress	2021
33548103	Amyotrophic lateral sclerosis-associated Vap33 is required for maintaining neuronal dendrite morphology and organelle distribution in Drosophila	2021
33547953	Screening for cognition in amyotrophic lateral sclerosis: test characteristics of a new screen	2021
33535464	NMR Characterization of Angiogenin Variants and tRNA(Ala) Products Impacting Aberrant Protein Oligomerization	2021
33535055	Rare variant burden analysis within enhancers identifies CAV1 as an ALS risk gene	2021
33519873	Predominance of Metabolic Resistance in a Six-Way-Resistant Palmer Amaranth (Amaranthus palmeri) Population	2021
33518565	Sporadic Amyotrophic Lateral Sclerosis Due to a FUS P525L Mutation with Asymmetric Muscle Weakness and Anti-ganglioside Antibodies	2021
33518041	Florasulam resistance status of flixweed (Descurainia sophia L.) and alternative herbicides for its chemical control in the North China plain	2021
33515719	Assessment of causal effects of physical activity on neurodegenerative diseases: A Mendelian randomization study	2021
33498150	A Two-in-One Strategy: Target and Nontarget Site Mechanisms Both Play Important Role in IMI-Resistant Weedy Rice	2021
33497646	Impairment of mitochondrial oxidative phosphorylation in skin fibroblasts of SALS and FALS patients is rescued by in vitro treatment with ROS scavengers	2021
33495278	SFPQ regulates the accumulation of RNA foci and dipeptide repeat proteins from the expanded repeat mutation in C9orf72	2021
33484360	A single gene inherited trait confers metabolic resistance to chlorsulfuron in grain sorghum (Sorghum bicolor)	2021
33481327	Identification of the first glyphosate-resistant capeweed (Arctotheca calendula) population	2021
33479441	Serum naturally occurring anti-TDP-43 auto-antibodies are increased in amyotrophic lateral sclerosis	2021
33479240	SVIP is a molecular determinant of lysosomal dynamic stability, neurodegeneration and lifespan	2021
33473007	Advances in genetics research in the pathogenesis of amyotrophic lateral sclerosis	2020
33461946	Deregulation of phosphatidylinositol-4-phosphate in the development of amyotrophic lateral sclerosis 8	2021
33453999	Wildtype σ1 receptor and the receptor agonist improve ALS-associated mutation-induced insolubility and toxicity	2020
33448235	A novel nonsense SOD1 mutation (p.Asn140Ter) in a sporadic amyotrophic lateral sclerosis case with rapid progression	2021
33445179	Novel variants and cellular studies on patients' primary fibroblasts support a role for NEK1 missense variants in ALS pathogenesis	2021
33442389	Social Cognition Deficits Are Pervasive across Both Classical and Overlap Frontotemporal Dementia Syndromes	2020
33433460	Regulation of neuronal bioenergetics as a therapeutic strategy in neurodegenerative diseases	2021
33431003	Activity landscape image analysis using convolutional neural networks	2020
33424531	Case Report: Association of a Variant of Unknown Significance in the FIG4 Gene With Frontotemporal Dementia and Slowly Progressing Motoneuron Disease: A Case Report Depicting Common Challenges in Clinical and Genetic Diagnostics of Rare Neuropsychiatric and Neurologic Disorders	2020
33421737	Longitudinal changes in network homogeneity in presymptomatic C9orf72 mutation carriers	2021
33421065	TDP-43 Vasculopathy in the Spinal Cord in Sporadic Amyotrophic Lateral Sclerosis (sALS) and Frontal Cortex in sALS/FTLD-TDP	2021
33420941	A combined clinical and computational approach to understand the SOD1(A4T)-mediated pathogenesis of rapidly progressive familial amyotrophic lateral sclerosis	2022
33417599	Identifying drug targets for neurological and psychiatric disease via genetics and the brain transcriptome	2021
33415820	An autopsy report of a familial amyotrophic lateral sclerosis case carrying VCP Arg487His mutation with a unique TDP-43 proteinopathy	2021
33415684	In vivo Validation of Bimolecular Fluorescence Complementation (BiFC) to Investigate Aggregate Formation in Amyotrophic Lateral Sclerosis (ALS)	2021
33414559	Genetic analysis of ALS cases in the isolated island population of Malta	2021
33411976	Cytoplasmic granule formation by FUS-R495X is attributable to arginine methylation in all Gly-rich, RGG1 and RGG2 domains	2021
33409820	Extra-motor cerebral changes and manifestations in primary lateral sclerosis	2021
33408686	Case Report: Early-Onset Behavioral Variant Frontotemporal Dementia in Patient With Retrotransposed Full-Length Transcript of Matrin-3 Variant 5	2020
33408239	Effect of familial clustering in the genetic screening of 235 French ALS families	2021
33407722	Executive function is inversely correlated with physical function: the cognitive profile of adult Spinal Muscular Atrophy (SMA)	2021
33398403	Mitochondrial bioenergetic deficits in C9orf72 amyotrophic lateral sclerosis motor neurons cause dysfunctional axonal homeostasis	2021
33398047	Probing the influence of mutations on FUS condensates, one molecule at a time	2021
33388707	Generation of two induced pluripotent stem cell (iPSC) lines from an ALS patient with simultaneous mutations in KIF5A and MATR3 genes	2020
33387304	Association of Single Nucleotide Polymorphism at rs2275294 in the ZNF512B Gene with Prognosis in Amyotrophic Lateral Sclerosis	2021
33380492	Beta-synuclein in cerebrospinal fluid as an early diagnostic marker of Alzheimer's disease	2021
33376800	Who and Why? Requests for Presymptomatic Genetic Testing for Amyotrophic Lateral Sclerosis/Frontotemporal Dementia vs Huntington Disease	2020
33372030	Comparison of Phenotypic Characteristics and Prognosis Between Black and White Patients in a Tertiary ALS Clinic	2021
33359139	The M1311V variant of ATP7A is associated with impaired trafficking and copper homeostasis in models of motor neuron disease	2021
33357560	RNA-Seq transcriptome analysis to identify candidate genes involved in non-target site-based mesosulfuron-methyl resistance in Beckmannia syzigachne	2021
33354770	FUS regulates autophagy by mediating the transcription of genes critical to the autophagosome formation	2021
33339634	The wide-ranging clinical and genetic features in Japanese families with valosin-containing protein proteinopathy	2021
33338404	ALS/FTLD-Linked Mutations in FUS Glycine Residues Cause Accelerated Gelation and Reduced Interactions with Wild-Type FUS	2020
33333712	Exosc2 deficiency leads to developmental disorders by causing a nucleotide pool imbalance in zebrafish	2020
33333218	Some pathogenic SETX variants are partially conserved during evolution	2021
33332713	Enhanced metabolism and target gene overexpression confer resistance against acetolactate synthase-inhibiting herbicides in Bromus sterilis	2021
33332650	Lipid alterations in human frontal cortex in ALS-FTLD-TDP43 proteinopathy spectrum are partly related to peroxisome impairment	2021
33329355	Resting State Functional Connectivity Is Decreased Globally Across the C9orf72 Mutation Spectrum	2020
33329348	Sporadic Creutzfeldt-Jakob Disease and Other Proteinopathies in Comorbidity	2020
33328898	Human Motor Neurons With SOD1-G93A Mutation Generated From CRISPR/Cas9 Gene-Edited iPSCs Develop Pathological Features of Amyotrophic Lateral Sclerosis	2020
33325387	Detection of the SQSTM1 Mutation in a Patient with Early-Onset Hippocampal Amnestic Syndrome	2021
33314436	A novel temporal-predominant neuro-astroglial tauopathy associated with TMEM106B gene polymorphism in FTLD/ALS-TDP	2021
33312375	hTBK1-c.978T>A mutation promotes the ferroptosis in NSC-34 cells via mediation of KEAP1/NRF2/p62 signaling	2020
33311513	The nuclear localization sequence mediates hnRNPA1 amyloid fibril formation revealed by cryoEM structure	2020
33311468	Aberrant interaction of FUS with the U1 snRNA provides a molecular mechanism of FUS induced amyotrophic lateral sclerosis	2020
33304373	Cytochrome P450 Herbicide Metabolism as the Main Mechanism of Cross-Resistance to ACCase- and ALS-Inhibitors in Lolium spp. Populations From Argentina: A Molecular Approach in Characterization and Detection	2020
33303220	The complement C7 variant rs3792646 is associated with amyotrophic lateral sclerosis in a Han Chinese population	2021
33301444	TDP-43 mutations link Amyotrophic Lateral Sclerosis with R-loop homeostasis and R loop-mediated DNA damage	2020
33284481	Cross and multiple herbicide resistance in annual bluegrass (Poa annua) populations from eastern Texas golf courses	2021
33276461	Genomic Portrait of a Sporadic Amyotrophic Lateral Sclerosis Case in a Large Spinocerebellar Ataxia Type 1 Family	2020
33271327	HuD regulates SOD1 expression during oxidative stress in differentiated neuroblastoma cells and sporadic ALS motor cortex	2021
33270986	Machine learning suggests polygenic risk for cognitive dysfunction in amyotrophic lateral sclerosis	2021
33264630	Rare Variant Burden Analysis within Enhancers Identifies CAV1 as an ALS Risk Gene	2020
33260324	Zinc Binds to RRM2 Peptide of TDP-43	2020
33253636	Molecular Dynamics Study of Structure, Folding, and Aggregation of Poly-PR and Poly-GR Proteins	2021
33244158	Premature termination codons in SOD1 causing Amyotrophic Lateral Sclerosis are predicted to escape the nonsense-mediated mRNA decay	2020
33239440	Plasma microRNA signature in presymptomatic and symptomatic subjects with C9orf72-associated frontotemporal dementia and amyotrophic lateral sclerosis	2021
33237378	Fractal genomics of SOD1 evolution	2020
33229560	Hsp40 proteins phase separate to chaperone the assembly and maintenance of membraneless organelles	2020
33226711	Mutation analysis of MFSD8 in an amyotrophic lateral sclerosis cohort from mainland China	2021
33226175	The FUS gene is dual-coding with both proteins contributing to FUS-mediated toxicity	2021
33223674	Synaptic Nuclear Envelope Protein 1 (SYNE 1) Ataxia with Amyotrophic Lateral Sclerosis-like Presentation: A Novel Synaptic Nuclear Envelope Protein 1 (SYNE 1) Gene Deletion Mutation from India	2020
33218681	Genetic screening of ANXA11 revealed novel mutations linked to amyotrophic lateral sclerosis	2021
33216044	Cerebrospinal Fluid Profiles in Parkinson's Disease: No Accumulation of Glucosylceramide, but Significant Downregulation of Active Complement C5 Fragment	2021
33213069	Increased C-X-C Motif Chemokine Ligand 12 Levels in Cerebrospinal Fluid as a Candidate Biomarker in Sporadic Amyotrophic Lateral Sclerosis	2020
33208543	Mutational Analysis of Known ALS Genes in an Italian Population-Based Cohort	2021
33202609	Presence of the HPPD Inhibitor Sensitive 1 Gene and ALS(S653N) Mutation in Weedy Oryza sativa Sensitive to Benzobicyclon	2020
33193563	A Novel Potentially Pathogenic Rare Variant in the DNAJC7 Gene Identified in Amyotrophic Lateral Sclerosis Patients From Mainland China	2020
33193482	Accumulation of Target Gene Mutations Confers Multiple Resistance to ALS, ACCase, and EPSPS Inhibitors in Lolium Species in Chile	2020
33189404	BVVL/ FL: features caused by SLC52A3 mutations; WDFY4 and TNFSF13B may be novel causative genes	2021
33187550	Frequency and methylation status of selected retrotransposition competent L1 loci in amyotrophic lateral sclerosis	2020
33172210	Stress-Specific Spatiotemporal Responses of RNA-Binding Proteins in Human Stem-Cell-Derived Motor Neurons	2020
33165814	Generating broad-spectrum tolerance to ALS-inhibiting herbicides in rice by base editing	2021
33159856	ALS/FTLD-Linked Mutations in FUS Glycine Residues Cause Accelerated Gelation and Reduced Interactions with Wild-Type FUS	2020
33159016	Identification of novel FUS and TARDBP gene mutations in Chinese amyotrophic lateral sclerosis patients with HRM analysis	2020
33155544	Sural biopsy to detect the axonal cytoskeleton defects in KIF5A-related Charcot-Marie-Tooth disease type 2	2021
33155358	Genotype-phenotype correlation in seven motor neuron disease families with novel ALS2 mutations	2021
33151007	Frontotemporal dementia-linked P112H mutation of TDP-43 induces protein structural change and impairs its RNA binding function	2021
33148607	Overexpression of an ALS-associated FUS mutation in C. elegans disrupts NMJ morphology and leads to defective neuromuscular transmission	2020
33144500	Redox-mediated regulation of an evolutionarily conserved cross-β structure formed by the TDP43 low complexity domain	2020
33139114	Structure-activity relationship (SAR) studies of N-(3-methylpyridin-2-yl)-4-(pyridin-2-yl)thiazol-2-amine (SRI-22819) as NF-ҡB activators for the treatment of ALS	2021
33131137	Co-incidental C9orf72 expansion mutation-related frontotemporal lobar degeneration pathology and sporadic Creutzfeldt-Jakob disease	2021
33129345	RNA dependent suppression of C9orf72 ALS/FTD associated neurodegeneration by Matrin-3	2020
33113361	Genome-wide Meta-analysis Finds the ACSL5-ZDHHC6 Locus Is Associated with ALS and Links Weight Loss to the Disease Genetics	2020
33106391	Differential Neuropsychological Profile of Patients With Amyotrophic Lateral Sclerosis With and Without C9orf72 Mutation	2021
33101340	Pro-197-Ser Mutation in ALS and High-Level GST Activities: Multiple Resistance to ALS and ACCase Inhibitors in Beckmannia syzigachne	2020
33095366	Association between serum paraoxonase 1 activity and its polymorphisms with multiple sclerosis: a systematic review	2021
33093822	A Human iPSC Line Carrying a de novo Pathogenic FUS Mutation Identified in a Patient With Juvenile ALS Differentiated Into Motor Neurons With Pathological Characteristics	2020
33087694	Prevention of mitochondrial impairment by inhibition of protein phosphatase 1 activity in amyotrophic lateral sclerosis	2020
33087501	ANXA11 mutations in ALS cause dysregulation of calcium homeostasis and stress granule dynamics	2020
33087425	Study on sleep-wake disorders in patients with genetic and non-genetic amyotrophic lateral sclerosis	2020
33082139	FUS contributes to mTOR-dependent inhibition of translation	2020
33077813	Multiple mutations in the EPSPS and ALS genes of Amaranthus hybridus underlie resistance to glyphosate and ALS inhibitors	2020
33077544	Identification of a pathogenic intronic KIF5A mutation in an ALS-FTD kindred	2020
33070529	H63D CG genotype of HFE is associated with increased risk of sporadic amyotrophic lateral sclerosis in a single population	2020
33065963	ALS-Related Mutant SOD1 Aggregates Interfere with Mitophagy by Sequestering the Autophagy Receptor Optineurin	2020
33062890	Rapid progressive ALS in a patient with a DNAJC7 loss-of-function mutation	2020
33058881	Insight into the Autosomal-Dominant Inheritance Pattern of SOD1-Associated ALS from Native Mass Spectrometry	2020
33058338	A Novel Duplication in ATXN2 as Modifier for Spinocerebellar Ataxia 3 (SCA3) and C9ORF72-ALS	2021
33055142	Cognition and behaviour in frontotemporal dementia with and without amyotrophic lateral sclerosis	2020
33051492	Mechanistic insights into the loss-of-function mechanisms of rare human D-amino acid oxidase variants implicated in amyotrophic lateral sclerosis	2020
33036560	Does conserved domain SOD1 mutation has any role in ALS severity and therapeutic outcome?	2020
33027627	Metal(loid)s role in the pathogenesis of amyotrophic lateral sclerosis: Environmental, epidemiological, and genetic data	2021
33026249	Full-length TDP-43 and its C-terminal domain form filaments in vitro having non-amyloid properties	2021
33023639	Prime editing efficiently generates W542L and S621I double mutations in two ALS genes in maize	2020
33020464	The ALS-related σ1R E102Q Mutant Eludes Ligand Control and Exhibits Anomalous Response to Calcium	2020
33013410	Type I PRMT Inhibition Protects Against C9ORF72 Arginine-Rich Dipeptide Repeat Toxicity	2020
33013311	Commentary: Effects of ALS-associated TANK binding kinase 1 mutations on protein-protein interactions and kinase activity	2020
33001405	Broadening the clinical spectrum of FUS mutations: a case with monomelic amyotrophy with a late progression to amyotrophic lateral sclerosis	2021
32997296	Unusual electrophysiological findings in a Chinese ALS 4 family with SETX-L389S mutation: a three-year follow-up	2021
32994185	Age-dependent degeneration of an identified adult leg motor neuron in a Drosophila SOD1 model of ALS	2020
32993728	Phenotypic diversity in an international Cure VCP Disease registry	2020
32989102	Identification of GGC repeat expansion in the NOTCH2NLC gene in amyotrophic lateral sclerosis	2020
32987860	High-Throughput Genetic Testing in ALS: The Challenging Path of Variant Classification Considering the ACMG Guidelines	2020
32980182	Variable clinical phenotype in TBK1 mutations: case report of a novel mutation causing primary progressive aphasia and review of the literature	2021
32978838	Cardiovascular disease, psychiatric diagnosis and sex differences in the multistep hypothesis of amyotrophic lateral sclerosis	2021
32975212	C9orf72-Associated Arginine-Rich Dipeptide Repeat Proteins Reduce the Number of Golgi Outposts and Dendritic Branches in Drosophila Neurons	2020
32968195	A multi-ethnic meta-analysis identifies novel genes, including ACSL5, associated with amyotrophic lateral sclerosis	2020
32961397	Isolated parkinsonism is an atypical presentation of GRN and C9orf72 gene mutations	2020
32951934	Genetic investigation of amyotrophic lateral sclerosis patients in south Italy: a two-decade analysis	2021
32949047	Necrosome-positive granulovacuolar degeneration is associated with TDP-43 pathological lesions in the hippocampus of ALS/FTLD cases	2021
32948071	Clinical and Molecular Landscape of ALS Patients with SOD1 Mutations: Novel Pathogenic Variants and Novel Phenotypes. A Single ALS Center Study	2020
32941707	Association of rare variants in neurodegenerative genes with familial Alzheimer's disease	2020
32924606	Interleukin 6 (IL6) level is a biomarker for functional disease progression within IL6R(358)Ala variant groups in amyotrophic lateral sclerosis patients	2021
32924445	Trifluoroethanol Partially Unfolds G93A SOD1 Leading to Protein Aggregation: A Study by Native Mass Spectrometry and FPOP Protein Footprinting	2020
32921502	No association of CpG SNP rs9357140 with onset age in Belgian C9orf72 repeat expansion carriers	2021
32920598	Loss-of-function variants in NEK1 are associated with an increased risk of sporadic ALS in the Japanese population	2021
32917270	Reduced mitochondrial D-loop methylation levels in sporadic amyotrophic lateral sclerosis	2020
32915525	Efficacy of Ciprofloxacin/Celecoxib combination in zebrafish models of amyotrophic lateral sclerosis	2020
32913016	Cortical microstructure in the amyotrophic lateral sclerosis-frontotemporal dementia continuum	2020
32905541	Neuronal Transcriptome from C9orf72 Repeat Expanded Human Tissue is Associated with Loss of C9orf72 Function	2020
32897108	Mutations of DNAJC7 are rare in Chinese amyotrophic lateral sclerosis patients	2021
32893042	Four novel optineurin mutations in patients with sporadic amyotrophic lateral sclerosis in Mainland China	2021
32893041	TBK1 variants in Chinese patients with amyotrophic lateral sclerosis	2021
32888732	Genetic and functional analysis of KIF5A variants in Japanese patients with sporadic amyotrophic lateral sclerosis	2021
32887544	Isolation and characterization of antibody fragments selective for human FTD brain derived TDP-43 variants	2020
32877292	The prion-like domain of Fused in Sarcoma is phosphorylated by multiple kinases affecting liquid- and solid-phase transitions	2020
32870032	Juvenile amyotrophic lateral sclerosis with complex phenotypes associated with novel SYNE1 mutations	2021
32868812	Functional skeletal muscle model derived from SOD1-mutant ALS patient iPSCs recapitulates hallmarks of disease progression	2020
32867756	Honeybee products and edible insect powders improve locomotive and learning abilities of Ubiquilin-knockdown Drosophila	2020
32865792	Development of LNA Gapmer Oligonucleotide-Based Therapy for ALS/FTD Caused by the C9orf72 Repeat Expansion	2020
32857759	Immiscible inclusion bodies formed by polyglutamine and poly(glycine-alanine) are enriched with distinct proteomes but converge in proteins that are risk factors for disease and involved in protein degradation	2020
32855285	Deficits in verbal fluency in presymptomatic C9orf72 mutation gene carriers-a developmental disorder	2020
32848248	Structure of the C9orf72 ARF GAP complex that is haploinsufficient in ALS and FTD	2020
32835772	ALS-associated TBK1 variant p.G175S is defective in phosphorylation of p62 and impacts TBK1-mediated signalling and TDP-43 autophagic degradation	2020
32828812	Expression of acid-labile subunit (ALS) in developing and adult zebrafish and its role in dorso-ventral patterning during development	2020
32828371	Investigation of resistant level to tribenuron-methyl, diversity and regional difference of the resistant mutations on acetolactate synthase (ALS) isozymes in Descurainia sophia L. from China	2020
32827688	Chronic stress induces formation of stress granules and pathological TDP-43 aggregates in human ALS fibroblasts and iPSC-motoneurons	2020
32815063	Splice-site mutations in KIF5A in the Japanese case series of amyotrophic lateral sclerosis	2021
32811564	RNA-recognition motif in Matrin-3 mediates neurodegeneration through interaction with hnRNPM	2020
32811199	The Edinburgh Cognitive and Behavioral ALS Screen (ECAS) in frontotemporal dementia	2020
32801000	Neuroprotective activity of ursodeoxycholic acid in CHMP2B(Intron5) models of frontotemporal dementia	2020
32796719	A Computational Study of Executive Dysfunction in Amyotrophic Lateral Sclerosis	2020
32790644	Truncated stathmin-2 is a marker of TDP-43 pathology in frontotemporal dementia	2020
32789025	Identity by descent analysis identifies founder events and links SOD1 familial and sporadic ALS cases	2020
32778941	Antibody against TDP-43 phosphorylated at serine 375 suggests conformational differences of TDP-43 aggregates among FTLD-TDP subtypes	2020
32777948	Putative founder effect in the Polish, Iranian and United States populations for the L144S SOD1 mutation associated with slowly uniform phenotype of amyotrophic lateral sclerosis	2021
32772750	NEK1 and GRN mutations coexist in a sporadic Chinese Hui descent ALS patient	2020
32770314	Causal Association of Leukocytes Count and Amyotrophic Lateral Sclerosis: a Mendelian Randomization Study	2020
32769137	Amyotrophic lateral sclerosis with a heterozygous D91A SOD1 variant and classical ALS-TDP neuropathology	2020
32769055	Longitudinal changes in resting state networks in early presymptomatic carriers of C9orf72 expansions	2020
32768728	Molecular dynamics of far positioned surface mutations of Cu/Zn SOD1 promotes altered structural stability and metal-binding site: Structural clues to the pathogenesis of amyotrophic lateral sclerosis	2020
32764283	Inclusion Formation and Toxicity of the ALS Protein RGNEF and Its Association with the Microtubule Network	2020
32764162	Model-based random forests for ordinal regression	2020
32762033	(11) C-PK11195 PET-based molecular study of microglia activation in SOD1 amyotrophic lateral sclerosis	2020
32757854	The Edinburgh Cognitive and Behavioural ALS Screen (ECAS) for Japanese ALS and FTD patients	2021
32754644	Disease-modifying effects of an SCAF4 structural variant in a predominantly SOD1 ALS cohort	2020
32742795	Canine SOD1 harboring E40K or T18S mutations promotes protein aggregation without reducing the global structural stability	2020
32739880	Generation of an induced pluripotent stem cell line, CSSi011-A (6534), from an Amyotrophic lateral sclerosis patient with heterozygous L145F mutation in SOD1 gene	2020
32734436	Papez Circuit Gray Matter and Episodic Memory in Amyotrophic Lateral Sclerosis and Behavioural Variant Frontotemporal Dementia	2021
32732921	Functional fine-mapping of noncoding risk variants in amyotrophic lateral sclerosis utilizing convolutional neural network	2020
32731060	Evolving diagnostic criteria in primary lateral sclerosis: The clinical and radiological basis of "probable PLS"	2020
32730793	Phase Separation of Toxic Dipeptide Repeat Proteins Related to C9orf72 ALS/FTD	2020
32729725	Facial onset amyotrophic lateral sclerosis with K3E variant in the Cu/Zn superoxide dismutase gene	2021
32729724	The distinct manifestation of young-onset amyotrophic lateral sclerosis in China	2021
32720527	Novel FUS mutation Y526F causing rapidly progressive familial amyotrophic lateral sclerosis	2021
32711768	A novel mutation Asp-2078-Glu in ACCase confers resistance to ACCase herbicides in barnyardgrass (Echinochloa crus-galli)	2020
32691043	Lysine acetylation regulates the RNA binding, subcellular localization and inclusion formation of FUS	2020
32690342	Rare, pathogenic variants in LRP10 are associated with amyotrophic lateral sclerosis in patients from mainland China	2021
32687767	Insights into amyotrophic lateral sclerosis linked Pro525Arg mutation in the fused in sarcoma protein through in silico analysis and molecular dynamics simulation	2021
32686621	SETX (senataxin), the helicase mutated in AOA2 and ALS4, functions in autophagy regulation	2021
32678146	Species identification, phylogenetic analysis and detection of herbicide-resistant biotypes of Amaranthus based on ALS and ITS	2020
32675077	Automated analysis of natural speech in amyotrophic lateral sclerosis spectrum disorders	2020
32671691	Phenotypic and genotypic features of patients diagnosed with ALS in the city of Sakarya, Turkey	2020
32666680	CSF chitinases before and after symptom onset in amyotrophic lateral sclerosis	2020
32662895	Frequent activating PIK3CA mutations in sporadic angiolipoma	2021
32659732	Generation of an ALS human iPSC line KEIOi001-A from peripheral blood of a Charcot disease-affected patient carrying TARDBP p.N345K heterozygous SNP mutation	2020
32657153	TDP-43 pathology in primary lateral sclerosis	2020
32654518	Clinical characteristics in young-adult ALS - results from a Portuguese cohort study	2020
32651855	Meta-analysis of the association between CHCHD10 Pro34Ser variant and the risk of amyotrophic lateral sclerosis	2021
32651246	Clinical features and outcomes of the flail arm and flail leg and pure lower motor neuron MND variants: a multicentre Italian study	2020
32649883	Stress Induces Dynamic, Cytotoxicity-Antagonizing TDP-43 Nuclear Bodies via Paraspeckle LncRNA NEAT1-Mediated Liquid-Liquid Phase Separation	2020
32648543	Miga-mediated endoplasmic reticulum-mitochondria contact sites regulate neuronal homeostasis	2020
32640133	SOD1 Suppression with Adeno-Associated Virus and MicroRNA in Familial ALS	2020
32640130	Phase 1-2 Trial of Antisense Oligonucleotide Tofersen for SOD1 ALS	2020
32640102	Base editing with high efficiency in allotetraploid oilseed rape by A3A-PBE system	2021
32638105	Targeted next-generation sequencing study in familial ALS-FTD Portuguese patients negative for C9orf72 HRE	2020
32633852	Neuropathological profile of long-duration amyotrophic lateral sclerosis in military Veterans	2020
32628315	Therapeutic potential of novel Cell Division Cycle Kinase 7 inhibitors on TDP-43-related pathogenesis such as Frontotemporal Lobar Degeneration (FTLD) and amyotrophic lateral sclerosis (ALS)	2021
32628265	Retrovirus reactivation in CHMP2BIntron5 models of frontotemporal dementia	2020
32627229	The Distinct Traits of the UNC13A Polymorphism in Amyotrophic Lateral Sclerosis	2020
32623917	Is the primate-specific protein pLG72 affecting SOD1 functionality and superoxide formation?	2020
32620127	TDP-43 prevents retrotransposon activation in the Drosophila motor system through regulation of Dicer-2 activity	2020
32619119	Concurrent sodium channelopathies and amyotrophic lateral sclerosis supports shared pathogenesis	2020
32616036	Quantitative patterns of motor cortex proteinopathy across ALS genotypes	2020
32600828	Mutations in the SIGMAR1 gene cause a distal hereditary motor neuropathy phenotype mimicking ALS: Report of two novel variants	2020
32598352	Resistance to acetolactate synthase inhibitors is due to a W 574 to L amino acid substitution in the ALS gene of redroot pigweed and tall waterhemp	2020
32592103	CYP1A2 rs762551 polymorphism and risk for amyotrophic lateral sclerosis	2021
32579787	Revisiting the complex architecture of ALS in Turkey: Expanding genotypes, shared phenotypes, molecular networks, and a public variant database	2020
32578243	Focal neuromyotonia associated with a C9ORF72 expansion mutation	2020
32577562	Tight expression regulation of senataxin, linked to motor neuron disease and ataxia, is required to avert cell-cycle block and nucleolus disassembly	2020
32575372	A Knowledge-Based Machine Learning Approach to Gene Prioritisation in Amyotrophic Lateral Sclerosis	2020
32547363	Dysregulation of RNA-Binding Proteins in Amyotrophic Lateral Sclerosis	2020
32537934	Extension of the phenotypic spectrum of GLE1-related disorders to a mild congenital form resembling congenital myopathy	2020
32517468	3D and 4D Image Fusion: Coping with Differences in Spectroscopic Modes among Hyperspectral Images	2020
32515902	Longitudinal biomarkers in amyotrophic lateral sclerosis	2020
32515490	Knockdown of genes involved in axonal transport enhances the toxicity of human neuromuscular disease-linked MATR3 mutations in Drosophila	2020
32505118	In vivo histopathological staging in C9orf72-associated ALS: A tract of interest DTI study	2020
32504093	Correction of amyotrophic lateral sclerosis related phenotypes in induced pluripotent stem cell-derived motor neurons carrying a hexanucleotide expansion mutation in C9orf72 by CRISPR/Cas9 genome editing using homology-directed repair	2020
32501131	A de novo c.1509dupA:p.R503fs mutation of FUS: report of a girl with sporadic juvenile amyotrophic lateral sclerosis	2020
32500351	Is NIPA1-associated hereditary spastic paraplegia always 'pure'? Further evidence of motor neurone disease and epilepsy as rare manifestations	2020
32500143	Salience Network Atrophy Links Neuron Type-Specific Pathobiology to Loss of Empathy in Frontotemporal Dementia	2020
32490968	Hardy-Weinberg Equilibrium in different mitochondrial haplogroups of four genes associated with neuroprotection and neurodegeneration	2020
32479602	FUS ALS-causative mutations impair FUS autoregulation and splicing factor networks through intron retention	2020
32477070	Cytoplasmic TDP43 Binds microRNAs: New Disease Targets in Amyotrophic Lateral Sclerosis	2020
32462798	Hand-onset weakness is a common feature of ALS patients with a NEK1 loss-of-function variant	2020
32462635	Regulation of ALS-Associated SOD1 Mutant SUMOylation and Aggregation by SENP and PIAS Family Proteins	2020
32452149	Metribuzin resistance via enhanced metabolism in a multiple herbicide resistant Lolium rigidum population	2020
32447552	SPG7 mutations in amyotrophic lateral sclerosis: a genetic link to hereditary spastic paraplegia	2020
32446203	The Redox Activity of Protein Disulfide Isomerase Inhibits ALS Phenotypes in Cellular and Zebrafish Models	2020
32445072	The Cysteine (Cys) Residues Cys-6 and Cys-111 in Mutant Superoxide Dismutase 1 (SOD1) A4V Are Required for Induction of Endoplasmic Reticulum Stress in Amyotrophic Lateral Sclerosis	2020
32442184	Generation of imidazolinone herbicide resistant trait in Arabidopsis	2020
32421156	Use of Multimodal Imaging and Clinical Biomarkers in Presymptomatic Carriers of C9orf72 Repeat Expansion	2020
32420986	Measuring RAN Peptide Toxicity in C. elegans	2020
32414878	Multimodal longitudinal study of structural brain involvement in amyotrophic lateral sclerosis	2020
32413959	UBQLN2 Promotes the Production of Type I Interferon via the TBK1-IRF3 Pathway	2020
32413284	Characterizing the Causal Pathway for Genetic Variants Associated with Neurological Phenotypes Using Human Brain-Derived Proteome Data	2020
32411012	Targeting Ubiquitin-Proteasome Pathway by Natural Products: Novel Therapeutic Strategy for Treatment of Neurodegenerative Diseases	2020
32409511	Evidence for polygenic and oligogenic basis of Australian sporadic amyotrophic lateral sclerosis	2020
32409253	Analysis of shared common genetic risk between amyotrophic lateral sclerosis and epilepsy	2020
32404191	Frameshift peptides alter the properties of truncated FUS proteins in ALS-FUS	2020
32399571	Exposure of a cryptic Hsp70 binding site determines the cytotoxicity of the ALS-associated SOD1-mutant A4V	2019
32397312	Burden of Rare Variants in ALS and Axonal Hereditary Neuropathy Genes Influence Survival in ALS: Insights from a Next Generation Sequencing Study of an Italian ALS Cohort	2020
32391572	Oligodendrocyte pathology exceeds axonal pathology in white matter in human amyotrophic lateral sclerosis	2020
32391060	Shared Regulatory Pathways Reveal Novel Genetic Correlations Between Grip Strength and Neuromuscular Disorders	2020
32385536	Oligogenicity, C9orf72 expansion, and variant severity in ALS	2020
32383641	Peripheral nerve pathology in VAPB-associated amyotrophic lateral sclerosis with dysautonomia in a Chinese family	2020
32383541	Description of combined ARHSP/JALS phenotype in some patients with SPG11 mutations	2020
32381627	ALS/FTD-associated protein FUS induces mitochondrial dysfunction by preferentially sequestering respiratory chain complex mRNAs	2020
32376919	Proteomics-Based Approach Identifies Altered ER Domain Properties by ALS-Linked VAPB Mutation	2020
32373852	The study of levels from redox-active elements in cerebrospinal fluid of amyotrophic lateral sclerosis patients carrying disease-related gene mutations shows potential copper dyshomeostasis	2020
32373611	Drosophila VCP/p97 Mediates Dynein-Dependent Retrograde Mitochondrial Motility in Axons	2020
32369618	Lipocalin-2 is increased in amyotrophic lateral sclerosis	2020
32367994	Variants in HNRNPDL and SETX Not Necessarily Indicate Familial Amyotrophic Lateral Sclerosis or Limb Girdle Muscular Dystrophy 1G in Acute Muscular Respiratory Failure	2020
32365420	VRK1 (Y213H) homozygous mutant impairs Cajal bodies in a hereditary case of distal motor neuropathy	2020
32365404	TDP43 proteinopathy is associated with aberrant DNA methylation in human amyotrophic lateral sclerosis	2021
32364389	The Unfolding Journey of Superoxide Dismutase 1 Barrels under Crowding: Atomistic Simulations Shed Light on Intermediate States and Their Interactions with Crowders	2020
32361669	Low-dose X-ray imaging may increase the risk of neurodegenerative diseases	2020
32359553	Characterization of the acetolactate synthase gene family in sensitive and resistant biotypes of two tetraploid Monochoria weeds, M. vaginalis and M. korsakowii	2020
32344647	Structure of the ALS Mutation Target Annexin A11 Reveals a Stabilising N-Terminal Segment	2020
32343854	Cytoplasmic localization of amyotrophic lateral sclerosis-related TDP-43 proteins modulates stress granule formation	2020
32338076	Prevalence of C9orf72 hexanucleotide repeat expansion in Greek patients with sporadic ALS	2020
32334137	Mutations in heat shock protein beta-1 (HSPB1) are associated with a range of clinical phenotypes related to different patterns of motor neuron dysfunction: A case series	2020
32331311	PACAP Modulates the Autophagy Process in an In Vitro Model of Amyotrophic Lateral Sclerosis	2020
32330447	Impairment of Mitochondrial Calcium Buffering Links Mutations in C9ORF72 and TARDBP in iPS-Derived Motor Neurons from Patients with ALS/FTD	2020
32330418	Non-coding and Loss-of-Function Coding Variants in TET2 are Associated with Multiple Neurodegenerative Diseases	2020
32328834	Mendelian randomization study to evaluate the effects of interleukin-6 signaling on four neurodegenerative diseases	2020
32325059	ALS/FTD-Linked Mutation in FUS Suppresses Intra-axonal Protein Synthesis and Drives Disease Without Nuclear Loss-of-Function of FUS	2020
32324396	p62/SQSTM1, a Central but Unexploited Target: Advances in Its Physiological/Pathogenic Functions and Small Molecular Modulators	2020
32314027	Combined brain and spinal FDG PET allows differentiation between ALS and ALS mimics	2020
32312103	Electrical impedance myography (EIM) in a natural history study of C9ORF72 mutation carriers	2020
32307925	FUS P525L mutation causing amyotrophic lateral sclerosis and movement disorders	2020
32301341	A novel mutation in the cleavage site N291 of TDP-43 protein in a familial case of amyotrophic lateral sclerosis	2020
32298515	Molecular analysis and clinical diversity of distal hereditary motor neuropathy	2020
32293029	The NGS technology for the identification of genes associated with the ALS. A systematic review	2020
32290710	First case of an UBQLN2 gene mutation causing frontotemporal dementia preceded by adult onset psychiatric symptoms	2020
32284329	Functional diversity between HSP70 paralogs caused by variable interactions with specific co-chaperones	2020
32284138	Mechanisms of Lolium rigidum multiple resistance to ALS- and ACCase-inhibiting herbicides and their impact on plant fitness	2020
32282804	C9orf72/ALFA-1 controls TFEB/HLH-30-dependent metabolism through dynamic regulation of Rag GTPases	2020
32280986	Different gene expression profiles in iPSC-derived motor neurons from ALS8 patients with variable clinical courses suggest mitigating pathways for neurodegeneration	2020
32277283	Characterization of therapy-related acute leukemia in hereditary breast-ovarian carcinoma patients: role of BRCA1 mutation and topoisomerase II-directed therapy	2020
32277059	Phenotypic variability in ALS-FTD and effect on survival	2020
32253937	A novel mutation in TARDBP segregates with amyotrophic lateral sclerosis in a large family with early onset and fast progression	2020
32250500	SOD1 p.D12Y variant is associated with amyotrophic lateral sclerosis/distal myopathy spectrum	2020
32248719	A novel p.N66T mutation in exon 3 of the SOD1 gene: report of two families of ALS patients with early cognitive impairment	2020
32242460	VRK1 variants in two Portuguese unrelated patients with childhood-onset motor neuron disease	2020
32226938	Improved detection of RNA foci in C9orf72 amyotrophic lateral sclerosis post-mortem tissue using BaseScope™ shows a lack of association with cognitive dysfunction	2020
32223976	A familial amyotrophic lateral sclerosis pedigree discordant for a novel p.Glu46Asp heterozygous OPTN variant and the p.Ala5Val heterozygous SOD1 missense mutation	2020
32223927	Dipeptide repeat derived from C9orf72 hexanucleotide expansions forms amyloids or natively unfolded structures in vitro	2020
32216790	TDP-43 promotes the formation of neuromuscular synapses through the regulation of Disc-large expression in Drosophila skeletal muscles	2020
32208303	Generation of twelve induced pluripotent stem cell lines from two healthy controls and two patients with sporadic amyotrophic lateral sclerosis	2020
32204915	Ibudilast enhances the clearance of SOD1 and TDP-43 aggregates through TFEB-mediated autophagy and lysosomal biogenesis: The new molecular mechanism of ibudilast and its implication for neuroprotective therapy	2020
32199908	Inactivation of Hippo and cJun-N-terminal Kinase (JNK) signaling mitigate FUS mediated neurodegeneration in vivo	2020
32191862	Friction-Limited Folding of Disulfide-Reduced Monomeric SOD1	2020
32189459	tRIP-seq reveals repression of premature polyadenylation by co-transcriptional FUS-U1 snRNP assembly	2020
32185242	Association of a structural variant within the SQSTM1 gene with amyotrophic lateral sclerosis	2020
32166880	Clinical and genetic features of patients with amyotrophic lateral sclerosis in southern China	2020
35492906	T54R mutation destabilizes the dimer of superoxide dismutase 1(T54R) by inducing steric clashes at the dimer interface	2020
32162544	Characterization of the amyotrophic lateral sclerosis-linked P56S mutation of the VAPB gene in Southern Brazil	2020
32151952	Generation of a human induced pluripotent stem cell (iPSC) line (IBMS-iPSC-048-05) from a patient with ALS and parkinsonism having a hexanucleotide repeat expansion mutation in C9orf72 gene	2020
32150619	Unravelling the effect of two herbicide resistance mutations on acetolactate synthase kinetics and growth traits	2020
32143681	A rare CACNA1H variant associated with amyotrophic lateral sclerosis causes complete loss of Ca(v)3.2 T-type channel activity	2020
32142142	Aggressive FUS-Mutant Motor Neuron Disease Without Profound Spinal Cord Pathology	2020
32142134	Characteristic Features of FUS Inclusions in Spinal Motor Neurons of Sporadic Amyotrophic Lateral Sclerosis	2020
32134532	Hypothesis: amyotrophic lateral sclerosis and environmental pollutants	2020
32132225	Different CSF protein profiles in amyotrophic lateral sclerosis and frontotemporal dementia with C9orf72 hexanucleotide repeat expansion	2020
32132204	TDP-43 α-helical structure tunes liquid-liquid phase separation and function	2020
32126264	ALS skin fibroblasts reveal oxidative stress and ERK1/2-mediated cytoplasmic localization of TDP-43	2020
32123847	Expression of mutant CHMP2B linked to neurodegeneration in humans disrupts circadian rhythms in Drosophila	2019
32123048	Inflammatory profiles relate to survival in subtypes of amyotrophic lateral sclerosis	2020
32121118	Mutations in Superoxide Dismutase 1 (Sod1) Linked to Familial Amyotrophic Lateral Sclerosis Can Disrupt High-Affinity Zinc-Binding Promoted by the Copper Chaperone for Sod1 (Ccs)	2020
32121108	Motor Neuron Generation from iPSCs from Identical Twins Discordant for Amyotrophic Lateral Sclerosis	2020
32117948	Push It to the Limit: Identification of Novel Amino Acid Changes on the Acetolactate Synthase Enzyme of Rice That Putatively Confer High Level of Tolerance to Different Imidazolinones	2020
32116969	Processing Prescriptively Incorrect Comparative Particles: Evidence From Sentence-Matching and Eye-Tracking	2020
32116647	Comparison of Gray Matter Atrophy in Behavioral Variant Frontal Temporal Dementia and Amyotrophic Lateral Sclerosis: A Coordinate-Based Meta-Analysis	2020
32116048	Chorea is a pleiotropic clinical feature of mutated fused-in-sarcoma in amyotrophic lateral sclerosis	2020
32111867	Loss of angiogenin function is related to earlier ALS onset and a paradoxical increase in ALS duration	2020
32101007	Targeted Mass Spectrometry Suggests Beta-Synuclein as Synaptic Blood Marker in Alzheimer's Disease	2020
32082115	Structural Variants May Be a Source of Missing Heritability in sALS	2020
32081878	Optogenetic modulation of TDP-43 oligomerization accelerates ALS-related pathologies in the spinal motor neurons	2020
32065797	ErbB4 Mutation that Decreased NRG1-ErbB4 Signaling Involved in the Pathogenesis of Amyotrophic Lateral Sclerosis/Frontotemporal Dementia	2020
32061023	Detection and characterization of resistance to acetolactate synthase inhibiting herbicides in Anisantha and Bromus species in the United Kingdom	2020
32060048	Distinct Regulation of σ (1) Receptor Multimerization by Its Agonists and Antagonists in Transfected Cells and Rat Liver Membranes	2020
32059759	Nucleocytoplasmic Proteomic Analysis Uncovers eRF1 and Nonsense-Mediated Decay as Modifiers of ALS/FTD C9orf72 Toxicity	2020
32056106	Nucleation and kinetics of SOD1 aggregation in human cells for ALS1	2020
32055286	The Glu102 mutation disrupts higher-order oligomerization of the sigma 1 receptor	2020
32043633	Incorporating external information to improve sparse signal detection in rare-variant gene-set-based analyses	2020
32042918	Incidence of pathogenic, likely pathogenic, and uncertain ALS variants in a clinic cohort	2020
32042907	Spastic paraplegia due to recessive or dominant mutations in ERLIN2 can convert to ALS	2019
32036052	A mutation in p62 protein (p. R321C), associated to Paget's disease of bone, causes a blockade of autophagy and an activation of NF-kB pathway	2020
32035847	C9orf72 hexanucleotide repeat expansion in Indian patients with ALS: a common founder and its geographical predilection	2020
32029478	TNF receptor-associated factor 6 interacts with ALS-linked misfolded superoxide dismutase 1 and promotes aggregation	2020
32028661	Sorting Rare ALS Genetic Variants by Targeted Re-Sequencing Panel in Italian Patients: OPTN, VCP, and SQSTM1 Variants Account for 3% of Rare Genetic Forms	2020
32023010	New phenotype of DCTN1-related spectrum: early-onset dHMN plus congenital foot deformity	2020
32022482	A juvenile ALS-like phenotype dramatically improved after high-dose riboflavin treatment	2020
32007267	ALS-causing D169G mutation disrupts the ATP-binding capacity of TDP-43 RRM1 domain	2020
32006803	The mRNA-based reprogramming of fibroblasts from a SOD1(E101G) familial amyotrophic lateral sclerosis patient to induced pluripotent stem cell line UOWi007	2020
32005289	DNA damage accumulates and responses are engaged in human ALS brain and spinal motor neurons and DNA repair is activatable in iPSC-derived motor neurons with SOD1 mutations	2020
32000403	Differential role of triggering receptors expressed on myeloid cells 2 R47H in 3 neurodegenerative diseases based on a systematic review and meta-analysis	2020
31992846	HSCT may lower leukemia risk in ELANE neutropenia: a before-after study from the French Severe Congenital Neutropenia Registry	2020
31982778	Mutation analysis of CAPN1 in Chinese populations with spastic paraplegia and related neurodegenerative diseases	2020
31959876	CRISPR-mediated gene correction links the ATP7A M1311V mutations with amyotrophic lateral sclerosis pathogenesis in one individual	2020
31957062	Clinical and Molecular Aspects of Senataxin Mutations in Amyotrophic Lateral Sclerosis 4	2020
31936602	VAPB ER-Aggregates, A Possible New Biomarker in ALS Pathology	2020
31932031	Pre-symptomatic diagnosis in ALS	2020
31928838	Development of novel small molecules for the treatment of ALS	2020
31928339	Differences in nerve excitability properties between isolated bulbar palsy and bulbar-dominant amyotrophic lateral sclerosis	2020
31927482	Splicing Defects of the Profilin Gene Alter Actin Dynamics in an S. pombe SMN Mutant	2020
31920544	Live-Cell Assays for Cell Stress Responses Reveal New Patterns of Cell Signaling Caused by Mutations in Rhodopsin, α-Synuclein and TDP-43	2019
31918966	The Sigma-1 Receptor at the Crossroad of Proteostasis, Neurodegeneration, and Autophagy	2020
31917988	Computational insights into mechanism of AIM4-mediated inhibition of aggregation of TDP-43 protein implicated in ALS and evidence for in vitro inhibition of liquid-liquid phase separation (LLPS) of TDP-43(2C)-A315T by AIM4	2020
31916305	Life Course Adiposity and Amyotrophic Lateral Sclerosis: A Mendelian Randomization Study	2020
31913476	Frontotemporal dementia non-sense mutation of progranulin rescued by aminoglycosides	2020
31911437	Granulins modulate liquid-liquid phase separation and aggregation of the prion-like C-terminal domain of the neurodegeneration-associated protein TDP-43	2020
31907290	ALS phenotype is influenced by age, sex, and genetics: A population-based study	2020
31900865	Depending on the stress, histone deacetylase inhibitors act as heat shock protein co-inducers in motor neurons and potentiate arimoclomol, exerting neuroprotection through multiple mechanisms in ALS models	2020
31900114	Chinese families with autosomal recessive hereditary spastic paraplegia caused by mutations in SPG11	2020
31898906	Exploring Folding Aspects of Monomeric Superoxide Dismutase	2020
31875556	Antiviral Immune Response as a Trigger of FUS Proteinopathy in Amyotrophic Lateral Sclerosis	2019
31872054	Identification of TYW3/CRYZ and FGD4 as susceptibility genes for amyotrophic lateral sclerosis	2019
31871138	Regional spreading of symptoms at diagnosis as a prognostic marker in amyotrophic lateral sclerosis: a population-based study	2020
31866807	Novel and Recurrent Mutations in a Cohort of Chinese Patients With Young-Onset Amyotrophic Lateral Sclerosis	2019
31864630	Strategies for (13)C enrichment calculation in Fourier-transform infrared CO(2) spectra containing spectral overlapping and nonlinear abundance-amount relations utilizing response surface fits	2020
31863610	A clinicopathological study of ALS with L126S mutation in the SOD1 gene presenting with isolated inferior olivary hypertrophy	2020
31859009	SQSTM1/p62 variants in 486 patients with familial ALS from Germany and Sweden	2020
31852254	The first case of the TARDBP p.G294V mutation in a homozygous state: is a single pathogenic allele sufficient to cause ALS?	2020
31841614	Mutant C9orf72 human iPSC-derived astrocytes cause non-cell autonomous motor neuron pathophysiology	2020
31838784	Novel mutation in optineurin causing aggressive ALS+/-frontotemporal dementia	2019
31835664	Primary Neurons and Differentiated NSC-34 Cells Are More Susceptible to Arginine-Rich ALS Dipeptide Repeat Protein-Associated Toxicity than Non-Differentiated NSC-34 and CHO Cells	2019
31834878	Genome wide analysis reveals heparan sulfate epimerase modulates TDP-43 proteinopathy	2019
31830646	Generation of an induced pluripotent stem cell line, ICGi014-A, by reprogramming peripheral blood mononuclear cells from a patient with homozygous D90A mutation in SOD1 causing Amyotrophic lateral sclerosis	2020
31817166	Evolutionary Analyses of Sequence and Structure Space Unravel the Structural Facets of SOD1	2019
31811140	Muscleblind acts as a modifier of FUS toxicity by modulating stress granule dynamics and SMN localization	2019
31806685	IL6 receptor(358)Ala variant and trans-signaling are disease modifiers in amyotrophic lateral sclerosis	2019
31802524	Association of missense variants in GDF9 with litter size in Entlebucher Mountain dogs	2020
31802421	A Familial Phenotypic and Genetic Study of Mutations in PFN1 Associated with Amyotrophic Lateral Sclerosis	2020
31802140	Amyotrophic lateral sclerosis-linked UBQLN2 mutants inhibit endoplasmic reticulum to Golgi transport, leading to Golgi fragmentation and ER stress	2020
31801573	RT(2) PCR array screening reveals distinct perturbations in DNA damage response signaling in FUS-associated motor neuron disease	2019
31796595	Characterization of the activity, aggregation, and toxicity of heterodimers of WT and ALS-associated mutant Sod1	2019
31794073	ASC-1 Is a Cell Cycle Regulator Associated with Severe and Mild Forms of Myopathy	2020
31788332	Genetic Spectrum and Variability in Chinese Patients with Amyotrophic Lateral Sclerosis	2019
31787569	Human iPSC-derived astrocytes from ALS patients with mutated C9ORF72 show increased oxidative stress and neurotoxicity	2019
31785838	Serum 25-hydroxyvitamin D in amyotrophic lateral sclerosis: mendelian randomization study	2020
31781168	Haplotype Analysis of the First A4V-SOD1 Spanish Family: Two Separate Founders or a Single Common Founder?	2019
31777322	Flail arm syndrome patients exhibit profound abnormalities in nerve conduction: an electromyography study	2019
31771229	Cytoplasmic Restriction of Mutated SOD1 Impairs the DNA Repair Process in Spinal Cord Neurons	2019
31768050	Exome sequencing in amyotrophic lateral sclerosis implicates a novel gene, DNAJC7, encoding a heat-shock protein	2019
31759189	A novel OPTN variant causing PSP-CBS-like phenotype in familial amyotrophic lateral sclerosis	2019
31748271	Effects of ALS-associated TANK binding kinase 1 mutations on protein-protein interactions and kinase activity	2019
31747286	An Allosteric Pathway in Copper, Zinc Superoxide Dismutase Unravels the Molecular Mechanism of the G93A Amyotrophic Lateral Sclerosis-Linked Mutation	2019
31745474	Multiple System Atrophy With Predominant Striatonigral Degeneration and TAR DNA-Binding Protein of 43 kDa Pathology: An Unusual Variant of Multiple System Atrophy	2019
31744522	Wild-type Cu/Zn-superoxide dismutase is misfolded in cerebrospinal fluid of sporadic amyotrophic lateral sclerosis	2019
31738367	Survival and Prognostic Factors in C9orf72 Repeat Expansion Carriers: A Systematic Review and Meta-analysis	2020
31736847	Patient-Reported Prevalence of Non-motor Symptoms Is Low in Adult Patients Suffering From 5q Spinal Muscular Atrophy	2019
31728929	A role for SUMOylation in the Formation and Cellular Localization of TDP-43 Aggregates in Amyotrophic Lateral Sclerosis	2020
31703746	Synergistic toxicity in an in vivo model of neurodegeneration through the co-expression of human TDP-43(M337V) and tau(T175D) protein	2019
31702465	Theme 2 Genetics and genomics	2019
31702461	CMS-01 Genetic testing for familial amyotrophic lateral sclerosis (ALS): insights and challenges	2019
31701227	Proteomics in cerebrospinal fluid and spinal cord suggests UCHL1, MAP2 and GPNMB as biomarkers and underpins importance of transcriptional pathways in amyotrophic lateral sclerosis	2020
31696229	Sigma-1 receptor is a key genetic modulator in amyotrophic lateral sclerosis	2020
31695598	Viral Infections Exacerbate FUS-ALS Phenotypes in iPSC-Derived Spinal Neurons in a Virus Species-Specific Manner	2019
31695223	Aproximación genética en la esclerosis lateral amiotrófica	2019
31682085	Phenotypes and malignancy risk of different FUS mutations in genetic amyotrophic lateral sclerosis	2019
31680811	ASCs-Exosomes Recover Coupling Efficiency and Mitochondrial Membrane Potential in an in vitro Model of ALS	2019
31677230	A family affair: resistance mechanism and alternative control of three Amaranthus species resistant to acetolactate synthase inhibitors in Italy	2020
31669277	Changes in hydrophobicity mainly promotes the aggregation tendency of ALS associated SOD1 mutants	2020
31669200	Causal effects of serum metabolites on amyotrophic lateral sclerosis: A Mendelian randomization study	2020
31668517	Identifying Anti-prion Chemical Compounds Using a Newly Established Yeast High-Throughput Screening System	2019
31665631	Postmortem Cortex Samples Identify Distinct Molecular Subtypes of ALS: Retrotransposon Activation, Oxidative Stress, and Activated Glia	2019
31659241	Target site as the main mechanism of resistance to imazamox in a Euphorbia heterophylla biotype	2019
31653410	Mutation analysis of GLT8D1 and ARPP21 genes in amyotrophic lateral sclerosis patients from mainland China	2020
31649034	High-throughput screening yields several small-molecule inhibitors of repeat-associated non-AUG translation	2019
31633109	TDP-43 cytoplasmic inclusion formation is disrupted in C9orf72-associated amyotrophic lateral sclerosis/frontotemporal lobar degeneration	2019
31630970	Loss of Dynamic RNA Interaction and Aberrant Phase Separation Induced by Two Distinct Types of ALS/FTD-Linked FUS Mutations	2020
31625064	Effect of Mutations in SOD1 and C9orf72 Genes on Autophagy in Lymphomonocytes in Myotrophic Lateral Sclerosis	2019
31624333	Pharmacogenetic interactions in amyotrophic lateral sclerosis: a step closer to a cure?	2020
31623154	The S100A4 Transcriptional Inhibitor Niclosamide Reduces Pro-Inflammatory and Migratory Phenotypes of Microglia: Implications for Amyotrophic Lateral Sclerosis	2019
31611269	IL6 receptor(358)Ala variant and trans-signaling are disease modifiers in amyotrophic lateral sclerosis	2019
31605140	RRM adjacent TARDBP mutations disrupt RNA binding and enhance TDP-43 proteinopathy	2019
31594814	An Amyloid Core Sequence in the Major Candida albicans Adhesin Als1p Mediates Cell-Cell Adhesion	2019
31579943	Dysregulation of AMPA receptor subunit expression in sporadic ALS post-mortem brain	2020
31578300	Prospective natural history study of C9orf72 ALS clinical characteristics and biomarkers	2019
31577344	Pathogenic mutations in the ALS gene CCNF cause cytoplasmic mislocalization of Cyclin F and elevated VCP ATPase activity	2019
31575382	Pathway Mutations in Breast Cancer Using Whole-Exome Sequencing	2020
31560180	Motor neuron diseases caused by a novel VRK1 variant - A genotype/phenotype study	2019
31557446	Genetic analyses uncover pleiotropic compensatory roles for Drosophila Nucleobindin-1 in inositol trisphosphate-mediated intracellular calcium homeostasis	2020
31550609	Physiological, biochemical and molecular bases of resistance to tribenuron-methyl and glyphosate in Conyza canadensis from olive groves in southern Spain	2019
31539493	RNA Granules Hitchhike on Lysosomes for Long-Distance Transport, Using Annexin A11 as a Molecular Tether	2019
31533043	A High-Content Screen Identifies TPP1 and Aurora B as Regulators of Axonal Mitochondrial Transport	2019
31530427	C9ORF72 hexanucleotide repeat expansion frequency in patients with Paget's disease of bone	2020
31527692	VRK1 functional insufficiency due to alterations in protein stability or kinase activity of human VRK1 pathogenic variants implicated in neuromotor syndromes	2019
31527135	Pleiotropic requirements for human TDP-43 in the regulation of cell and organelle homeostasis	2019
31525130	Homozygous sequestosome 1 (SQSTM1) mutation: a rare cause for childhood-onset progressive cerebellar ataxia with vertical gaze palsy	2019
31523813	Absence of hyperexcitability of spinal motoneurons in patients with amyotrophic lateral sclerosis	2019
31522742	Rapidly progressive bulbar-onset ALS due to SS18L1 mutation	2020
31521619	γ-Oryzanol mitigates oxidative stress and prevents mutant SOD1-Related neurotoxicity in Drosophila and cell models of amyotrophic lateral sclerosis	2019
31519910	The mutational landscape of a prion-like domain	2019
31516068	A novel role of UBQLNs (ubiquilins) in regulating autophagy, MTOR signaling and v-ATPase function	2020
31515480	Differentiation but not ALS mutations in FUS rewires motor neuron metabolism	2019
31513029	Frequency of the TREM2 R47H Variant in Various Neurodegenerative Disorders	2019
31510706	Using the structure of genome data in the design of deep neural networks for predicting amyotrophic lateral sclerosis from genotype	2019
31504503	Amyotrophic lateral sclerosis-associated TDP-43 mutation Q331K prevents nuclear translocation of XRCC4-DNA ligase 4 complex and is linked to genome damage-mediated neuronal apoptosis	2019
31498468	Neuropathological characterization of a novel TANK binding kinase (TBK1) gene loss of function mutation associated with amyotrophic lateral sclerosis	2020
31495574	Structure of the Respiratory Syncytial Virus Polymerase Complex	2019
31481451	The Acetylation of Lysine-376 of G3BP1 Regulates RNA Binding and Stress Granule Dynamics	2019
31475037	Comprehensive Genetic Analysis of a Hungarian Amyotrophic Lateral Sclerosis Cohort	2019
31469402	Glaucoma-Associated Mutations in the Optineurin Gene Have Limited Impact on Parkin-Dependent Mitophagy	2019
31445393	Generation and characterization of a human induced pluripotent stem cell line UOWi005-A from dermal fibroblasts derived from a CCNF(S621G) familial amyotrophic lateral sclerosis patient using mRNA reprogramming	2019
31445297	Two mutations, one family: C9orf72 and SQSTM1 in neurodegenerative diseases	2019
31444357	Modulation of actin polymerization affects nucleocytoplasmic transport in multiple forms of amyotrophic lateral sclerosis	2019
31439573	C9ORF72-related cellular pathology in skeletal myocytes derived from ALS-patient induced pluripotent stem cells	2019
31433984	Mining Disaggregase Sequence Space to Safely Counter TDP-43, FUS, and α-Synuclein Proteotoxicity	2019
31432691	Neurofilaments in pre-symptomatic ALS and the impact of genotype	2019
31432357	Identification and characterization of novel and rare susceptible variants in Indian amyotrophic lateral sclerosis patients	2019
31431468	Retinitis pigmentosa prior to familial ALS caused by a homozygous cilia and flagella-associated protein 410 mutation	2020
31430111	Characterizing TDP-43(307-319) Oligomeric Assembly: Mechanistic and Structural Implications Involved in the Etiology of Amyotrophic Lateral Sclerosis	2019
31422367	Whole-exome sequencing identified novel KIF5A mutations in Chinese patients with amyotrophic lateral sclerosis and Charcot-Marie-Tooth type 2	2020
31422280	Rational design of linear tripeptides against the aggregation of human mutant SOD1 protein causing amyotrophic lateral sclerosis	2019
31421506	The same cortico-efferent tract involvement in progressive bulbar palsy and in 'classical' ALS: A tract of interest-based MRI study	2019
31419723	ALS deficiency caused by an exon 2 deletion and a novel missense variant in the gene encoding ALS	2019
31417480	Hypothesis: Etiologic and Molecular Mechanistic Leads for Sporadic Neurodegenerative Diseases Based on Experience With Western Pacific ALS/PDC	2019
31405128	The Missing Heritability of Sporadic Frontotemporal Dementia: New Insights from Rare Variants in Neurodegenerative Candidate Genes	2019
31401564	Familial flail leg ALS caused by PFN1 mutation	2020
31400779	Resistance evolution and mechanisms to ALS-inhibiting herbicides in Capsella bursa-pastoris populations from China	2019
31395804	CD34 Identifies a Subset of Proliferating Microglial Cells Associated with Degenerating Motor Neurons in ALS	2019
31390360	Calcium-responsive transactivator (CREST) toxicity is rescued by loss of PBP1/ATXN2 function in a novel yeast proteinopathy model and in transgenic flies	2019
31378346	A Trp-574-Leu mutation in the acetolactate synthase (ALS) gene of Lithospermum arvense L. confers broad-spectrum resistance to ALS inhibitors	2019
31368019	Rare Angiogenin and Ribonuclease 4 variants associated with amyotrophic lateral sclerosis exhibit loss-of-function: a comprehensive in silico study	2019
31362587	ALS-FTLD-linked mutations of SQSTM1/p62 disrupt selective autophagy and NFE2L2/NRF2 anti-oxidative stress pathway	2020
31357627	Partial Failure of Proteostasis Systems Counteracting TDP-43 Aggregates in Neurodegenerative Diseases	2019
31346243	Cu/Zn-superoxide dismutase and wild-type like fALS SOD1 mutants produce cytotoxic quantities of H(2)O(2) via cysteine-dependent redox short-circuit	2019
31341015	Nonnative structure in a peptide model of the unfolded state of superoxide dismutase 1 (SOD1): Implications for ALS-linked aggregation	2019
31332433	SOD1 deficiency: a novel syndrome distinct from amyotrophic lateral sclerosis	2019
31332380	Noncoding CGG repeat expansions in neuronal intranuclear inclusion disease, oculopharyngodistal myopathy and an overlapping disease	2019
31329211	Lifetime Risk and Heritability of Amyotrophic Lateral Sclerosis	2019
31304888	Survival forests under test: Impact of the proportional hazards assumption on prognostic and predictive forests for amyotrophic lateral sclerosis survival	2020
31301488	Generation of patient-specific pluripotent induced stem cell line UFRJi007-A from a Brazilian familial amyotrophic lateral sclerosis patient	2019
31292500	Integrative multi-omic analysis identifies new drivers and pathways in molecularly distinct subtypes of ALS	2019
31291987	Dynactin1 depletion leads to neuromuscular synapse instability and functional abnormalities	2019
31286494	Intrafamilial variable spastic paraplegia/ataxia/ALS phenotype linked to a novel KIF5A mutation	2019
31280423	PCR-based identification of point mutation mediating acetolactate synthase-inhibiting herbicide resistance in weed wild mustard (Sinapis arvensis)	2019
31276859	Novel TBK1 LoF variant in a family with upper motor neuron predominant motor neuron disease	2019
31270924	Harnessing the power of next-generation sequencing technologies to the purpose of high-throughput pesticide resistance diagnosis	2020
31267315	Does SCFD1 rs10139154 Polymorphism Decrease Alzheimer's Disease Risk?	2019
31265279	Target-Site and Metabolic Resistance Mechanisms to Penoxsulam in Barnyardgrass (Echinochloa crus-galli (L.) P. Beauv)	2019
31262712	Aberrant axon branching via Fos-B dysregulation in FUS-ALS motor neurons	2019
31257275	Atypical Familial Amyotrophic Lateral Sclerosis with Slowly Progressing Lower Extremities-predominant Late-onset Muscular Weakness and Atrophy	2019
31244613	Synaptic FUS Localization During Motoneuron Development and Its Accumulation in Human ALS Synapses	2019
31244341	Clinicopathologic correlations in a family with a TBK1 mutation presenting as primary progressive aphasia and primary lateral sclerosis	2019
31242416	Mutant FUS and ELAVL4 (HuD) Aberrant Crosstalk in Amyotrophic Lateral Sclerosis	2019
31235914	Cryo-EM structures of four polymorphic TDP-43 amyloid cores	2019
31235725	Augmentation of spinal cord glutamatergic synaptic currents in zebrafish primary motoneurons expressing mutant human TARDBP (TDP-43)	2019
31230748	Far positioned ALS associated mutants of Cu/Zn SOD forms partially metallated, destabilized misfolding intermediates	2019
31225476	Endolysosomal dysfunction and exosome secretion: implications for neurodegenerative disorders	2018
31223078	Reviewing Biochemical Implications of Normal and Mutated Huntingtin in Huntington's Disease	2020
31221068	A Platform for Studying Neurodegeneration Mechanisms Using Genetically Encoded Biosensors	2019
31217692	New Mechanisms of DNA Repair Defects in Fused in Sarcoma-Associated Neurodegeneration: Stage Set for DNA Repair-Based Therapeutics?	2019
31216283	In silico analysis of PFN1 related to amyotrophic lateral sclerosis	2019
31201598	UNC13A variant rs12608932 is associated with increased risk of amyotrophic lateral sclerosis and reduced patient survival: a meta-analysis	2019
31199001	Phase separation in biology and disease-a symposium report	2019
31183926	Immunoreactivity of myelin-associated oligodendrocytic basic protein in Lewy bodies	2019
31178479	Novel VRK1 Mutations in a Patient with Childhood-onset Motor Neuron Disease	2019
31177556	Presymptomatic spinal cord pathology in c9orf72 mutation carriers: A longitudinal neuroimaging study	2019
31176717	Neuronal TDP-43 depletion affects activity-dependent plasticity	2019
31171724	Engineered protein disaggregases mitigate toxicity of aberrant prion-like fusion proteins underlying sarcoma	2019
31170830	Genotype-phenotype correlation and evidence for a common ancestor in two Italian ALS patients with the D124G SOD1 mutation	2019
31167121	Lou Gehrig's Disease (ALS): UBQLN2 Mutations Strike Out of Phase	2019
31165305	A novel S379A TARDBP mutation associated to late-onset sporadic ALS	2019
31160356	A novel TBK1 mutation in a family with diverse frontotemporal dementia spectrum disorders	2019
31156659	A Novel Single-Site Mutation in the Catalytic Domain of Protoporphyrinogen Oxidase IX (PPO) Confers Resistance to PPO-Inhibiting Herbicides	2019
31156370	Comparative Analysis of C9orf72 and Sporadic Disease in a Large Multicenter ALS Population: The Effect of Male Sex on Survival of C9orf72 Positive Patients	2019
31144027	Increased prevalence of granulovacuolar degeneration in C9orf72 mutation	2019
31134679	SOD1 in amyotrophic lateral sclerosis development - in silico analysis and molecular dynamics of A4F and A4V variants	2019
31133784	Cognitive Syndromes and C9orf72 Mutation Are Not Related to Cerebellar Degeneration in Amyotrophic Lateral Sclerosis	2019
31131421	A nonsynonymous mutation in PLCG2 reduces the risk of Alzheimer's disease, dementia with Lewy bodies and frontotemporal dementia, and increases the likelihood of longevity	2019
31127574	Reporter Assays for BER Pathway	2019
31126629	The role of C9orf72 in neurodegenerative disorders: a systematic review, an updated meta-analysis, and the creation of an online database	2019
31124595	p.N345K mutation in TARDBP in a patient with familial amyotrophic lateral sclerosis: An autopsy case	2019
31123140	CSF chitinase proteins in amyotrophic lateral sclerosis	2019
31108504	Altered calcium dynamics and glutamate receptor properties in iPSC-derived motor neurons from ALS patients with C9orf72, FUS, SOD1 or TDP43 mutations	2019
31108397	Rare homozygosity in amyotrophic lateral sclerosis suggests the contribution of recessive variants to disease genetics	2019
31107959	Motor neurons from ALS patients with mutations in C9ORF72 and SOD1 exhibit distinct transcriptional landscapes	2019
31102901	A quantitative model of human neurodegenerative diseases involving protein aggregation	2019
31092730	An endogenous peptide marker differentiates SOD1 stability and facilitates pharmacodynamic monitoring in SOD1 amyotrophic lateral sclerosis	2019
31089860	Amyotrophic lateral sclerosis type 8 is not a pure motor disease: evidence from a neuropsychological and behavioural study	2019
31086828	Oligogenic basis of sporadic ALS: The example of SOD1 p.Ala90Val mutation	2019
31071439	Evaluation of miscibility and polymorphism of synthetic and natural lipids for nanostructured lipid carrier (NLC) formulations by Raman mapping and multivariate curve resolution (MCR)	2019
31067307	Amyotrophic lateral sclerosis-associated TDP-43 mutation Q331K prevents nuclear translocation of XRCC4-DNA ligase 4 complex and is linked to genome damage-mediated neuronal apoptosis	2019
31060816	Rare, low-frequency and common coding variants of ARHGEF28 gene and their association with sporadic amyotrophic lateral sclerosis	2020
31051215	Simvastatin aggravates impaired autophagic flux in NSC34-hSOD1G93A cells through inhibition of geranylgeranyl pyrophosphate synthesis	2019
31043593	Structural basis for reversible amyloids of hnRNPA1 elucidates their role in stress granule assembly	2019
31038230	Off-Label Treatment of 4 Amyotrophic Lateral Sclerosis Patients With 4-Aminopyridine	2019
31025543	Angiogenin mutations in Hungarian patients with amyotrophic lateral sclerosis: Clinical, genetic, computational, and functional analyses	2019
31023341	eIF4B and eIF4H mediate GR production from expanded G4C2 in a Drosophila model for C9orf72-associated ALS	2019
31022718	Normal Growth despite Combined Pituitary Hormone Deficiency	2019
31018129	An Intramolecular Salt Bridge Linking TDP43 RNA Binding, Protein Stability, and TDP43-Dependent Neurodegeneration	2019
31017923	A context-based ABC model for literature-based discovery	2019
31017342	A hyperthermophilic protein G variant engineered via directed evolution prevents the formation of toxic SOD1 oligomers	2019
31010795	Plasma transfusion combined with chelating therapy alleviates fulminant Wilson's disease with a single Arg778Leu heterozygote mutation	2019
31009932	C9orf72 repeat expansions in South Africans with amyotrophic lateral sclerosis	2019
31000966	Gene-Environment-Time Interactions in Neurodegenerative Diseases: Hypotheses and Research Approaches	2018
31000212	Coexistence of variants in TBK1 and in other ALS-related genes elucidates an oligogenic model of pathogenesis in sporadic ALS	2019
30992335	Misfolded SOD1 inclusions in patients with mutations in C9orf72 and other ALS/FTD-associated genes	2019
30992063	Mutations in ATP13A2 (PARK9) are associated with an amyotrophic lateral sclerosis-like phenotype, implicating this locus in further phenotypic expansion	2019
30988404	Generation of herbicide tolerance traits and a new selectable marker in wheat using base editing	2019
30985904	Rare variants in MYH15 modify amyotrophic lateral sclerosis risk	2019
30982635	ALS-Linked Mutations Affect UBQLN2 Oligomerization and Phase Separation in a Position- and Amino Acid-Dependent Manner	2019
30976830	Fine-mapping of angular leaf spot resistance gene Phg-2 in common bean and development of molecular breeding tools	2019
30976013	Exome array analysis of rare and low frequency variants in amyotrophic lateral sclerosis	2019
30974102	Excess glutamate secreted from astrocytes drives upregulation of P-glycoprotein in endothelial cells in amyotrophic lateral sclerosis	2019
30961394	Predicting the future of ALS: the impact of demographic change and potential new treatments on the prevalence of ALS in the United Kingdom, 2020-2116	2019
30958470	Characterizing Histone Post-translational Modification Alterations in Yeast Neurodegenerative Proteinopathy Models	2019
30955949	Distal myopathy and rapidly progressive dementia associated with a novel mutation in the VCP gene: Expanding inclusion body myopathy with early-onset Paget disease and frontotemporal dementia spectrum	2019
30954537	An FTLD-associated SQSTM1 variant impacts Nrf2 and NF-κB signalling and is associated with reduced phosphorylation of p62	2019
30953736	The metastability of the proteome of spinal motor neurons underlies their selective vulnerability in ALS	2019
30946927	Phosphorylated NF-κB subunit p65 aggregates in granulovacuolar degeneration and neurites in neurodegenerative diseases with tauopathy	2019
30940688	A new approach for rare variation collapsing on functional protein domains implicates specific genic regions in ALS	2019
30939964	Retinoic acid worsens ATG10-dependent autophagy impairment in TBK1-mutant hiPSC-derived motoneurons through SQSTM1/p62 accumulation	2019
30939113	Drug S-oxidation and phenylalanine hydroxylase: a biomarker for neurodegenerative susceptibility in Parkinson's disease and amyotrophic lateral sclerosis	2019
30937520	FUS pathology in ALS is linked to alterations in multiple ALS-associated proteins and rescued by drugs stimulating autophagy	2019
30931641	Telomere length is greater in ALS than in controls: a whole genome sequencing study	2019
30917570	Analysis of 50 Neurodegenerative Genes in Clinically Diagnosed Early-Onset Alzheimer's Disease	2019
30911572	Eating peptides: biomarkers of neurodegeneration in amyotrophic lateral sclerosis and frontotemporal dementia	2019
30909235	Combined Transcriptomics and Proteomics in Frontal Cortex Area 8 in Frontotemporal Lobar Degeneration Linked to C9ORF72 Expansion	2019
30905713	Respiration Enhances TDP-43 Toxicity, but TDP-43 Retains Some Toxicity in the Absence of Respiration	2019
30903418	PON1 is a disease modifier gene in amyotrophic lateral sclerosis: association of the Q192R polymorphism with bulbar onset and reduced survival	2019
30901720	Chemometric study of the excipients' influence on polymorphic-behavior. Mefenamic acid as case of study	2019
30893702	Role of MAPT in Pure Motor Neuron Disease: Report of a Recurrent Mutation in Italian Patients	2018
30889971	Facial onset sensory and motor neuronopathy: a motor neuron disease with an oligogenic origin?	2019
30887850	Identification and functional analysis of novel mutations in the SOD1 gene in Chinese patients with amyotrophic lateral sclerosis	2019
30886437	Precise gene replacement in rice by RNA transcript-templated homologous recombination	2019
30886340	De novo single-nucleotide and copy number variation in discordant monozygotic twins reveals disease-related genes	2019
30883352	TREM2 Variants and Neurodegenerative Diseases: A Systematic Review and Meta-Analysis	2019
30879340	FUS-ALS presenting with myoclonic jerks in a 17-year-old man	2019
30879265	Amyotrophic lateral sclerosis due to a SOD1 mutation and X-linked recessive bulbospinal neuronopathy in a single family	2019
30879219	ERCC6L2 rs591486 polymorphism and risk for amyotrophic lateral sclerosis in Greek population	2019
30873018	Emergence of Microglia Bearing Senescence Markers During Paralysis Progression in a Rat Model of Inherited ALS	2019
30872628	Combined Tissue-Fluid Proteomics to Unravel Phenotypic Variability in Amyotrophic Lateral Sclerosis	2019
30863976	The molecular pathogenesis of superoxide dismutase 1-linked ALS is promoted by low oxygen tension	2019
30863961	Unique characteristics of the genetics epidemiology of amyotrophic lateral sclerosis in China	2019
30861516	Prevalence of C9ORF72 Expansion in a Large Series of Patients with Idiopathic Normal-Pressure Hydrocephalus	2019
30857630	Target-site and non-target-site-based resistance to tribenuron-methyl in multiply-resistant Myosoton aquaticum L	2019
30857621	Isolation and expression of acetolactate synthase genes that have a rare mutation in shepherd's purse (Capsella bursa-pastoris (L.) Medik.)	2019
30847374	A novel VRK1 mutation associated with recessive distal hereditary motor neuropathy	2018
30846540	Comparison of the clinical and genetic features of amyotrophic lateral sclerosis across Cuban, Uruguayan and Irish clinic-based populations	2019
30835568	ALSgeneScanner: a pipeline for the analysis and interpretation of DNA sequencing data of ALS patients	2019
30831216	Virtual screening identification of novel chemical inhibitors for aberrant interactions between pathogenic mutant SOD1 and tubulin	2019
30824544	Detection of TAR DNA-binding protein 43 (TDP-43) oligomers as initial intermediate species during aggregate formation	2019
30811981	Mutations in the Glycosyltransferase Domain of GLT8D1 Are Associated with Familial Amyotrophic Lateral Sclerosis	2019
30806671	Quantitative proteomics identifies proteins that resist translational repression and become dysregulated in ALS-FUS	2019
30804504	Ubiquilins regulate autophagic flux through mTOR signalling and lysosomal acidification	2019
30779284	Phenotypic and molecular characterisation of novel Vicia faba germplasm with tolerance to acetohydroxyacid synthase-inhibiting herbicides (AHAS) developed through mutagenesis techniques	2019
30778698	Next-generation sequencing study reveals the broader variant spectrum of hereditary spastic paraplegia and related phenotypes	2019
30776581	Artificial MicroRNAs Targeting C9orf72 Can Reduce Accumulation of Intra-nuclear Transcripts in ALS and FTD Patients	2019
30770429	The underacknowledged PPA-ALS: A unique clinicopathologic subtype with strong heritability	2019
30765051	Resistance of Rapistrum rugosum to tribenuron and imazamox due to Trp574 or Pro197 substitution in the acetolactate synthase	2019
30745340	Nuclear RNA foci from C9ORF72 expansion mutation form paraspeckle-like bodies	2019
30741620	VAMP associated proteins are required for autophagic and lysosomal degradation by promoting a PtdIns4P-mediated endosomal pathway	2019
30740972	Stability Effect of Quinary Interactions Reversed by Single Point Mutations	2019
30734322	Toward in vivo determination of peripheral nervous system immune activity in amyotrophic lateral sclerosis	2019
30728452	PARylation regulates stress granule dynamics, phase separation, and neurotoxicity of disease-related RNA-binding proteins	2019
30720798	RNA-Seq profiling in peripheral blood mononuclear cells of amyotrophic lateral sclerosis patients and controls	2019
30717585	A Novel Homozygous Mutation of the Acid-Labile Subunit (IGFALS) Gene in a Male Adolescent	2019
30710110	The catalytic activity and secretion of zebrafish RNases are essential for their in vivo function in motor neurons and vasculature	2019
30707165	Polymorphism analysis of virulence-related genes among Candida tropicalis isolates	2019
30705258	FDG-PET underscores the key role of the thalamus in frontotemporal lobar degeneration caused by C9ORF72 mutations	2019
30701485	Computational Investigation on Electrostatic Loop Mutants Instigating Destabilization and Aggregation on Human SOD1 Protein Causing Amyotrophic Lateral Sclerosis	2019
30700593	TDP43 pathology in the brain, spinal cord, and dorsal root ganglia of a patient with FOSMN	2019
30691483	Genetic risk variants for brain disorders are enriched in cortical H3K27ac domains	2019
30690059	Neuroprotection by urate on the mutant hSOD1-related cellular and Drosophila models of amyotrophic lateral sclerosis: Implication for GSH synthesis via activating Akt/GSK3β/Nrf2/GCLC pathways	2019
30685122	The association between repeat number in C9orf72 and phenotypic variability in Turkish patients with frontotemporal lobar degeneration	2019
30684766	A juvenile sporadic amyotrophic lateral sclerosis case with P525L mutation in the FUS gene: A rare co-occurrence of autism spectrum disorder and tremor	2019
30669930	Neuropathy-causing mutations in HSPB1 impair autophagy by disturbing the formation of SQSTM1/p62 bodies	2019
30669298	Transgene-Free Genome Editing in Tomato and Potato Plants Using Agrobacterium-Mediated Delivery of a CRISPR/Cas9 Cytidine Base Editor	2019
30668155	Primary progressive aphasia and the FTD-MND spectrum disorders: clinical, pathological, and neuroimaging correlates	2019
30665069	Superconditioning TMS unmasks latent voluntary innervation in MND - A case report	2019
30661401	Typical bulbar ALS can be linked to GARS mutation	2019
30659642	Combined fused in sarcoma-positive (FUS+) basophilic inclusion body disease and atypical tauopathy presenting with an amyotrophic lateral sclerosis/motor neurone disease (ALS/MND)-plus phenotype	2019
30650353	Microtubules Deform the Nuclear Membrane and Disrupt Nucleocytoplasmic Transport in Tau-Mediated Frontotemporal Dementia	2019
30643298	Premature polyadenylation-mediated loss of stathmin-2 is a hallmark of TDP-43-dependent neurodegeneration	2019
30643292	ALS-implicated protein TDP-43 sustains levels of STMN2, a mediator of motor neuron growth and repair	2019
30642400	ALS-linked FUS mutations confer loss and gain of function in the nucleus by promoting excessive formation of dysfunctional paraspeckles	2019
30640451	Metribuzin Resistance in a Wild Radish ( Raphanus raphanistrum) Population via Both psbA Gene Mutation and Enhanced Metabolism	2019
30639592	Repeated repeat problems: Combinatorial effect of C9orf72-derived dipeptide repeat proteins	2019
30637102	Better survival in female SOD1-mutant patients with ALS: a study of SOD1-related natural history	2019
30636905	A De Novo RAPGEF2 Variant Identified in a Sporadic Amyotrophic Lateral Sclerosis Patient Impairs Microtubule Stability and Axonal Mitochondria Distribution	2018
30635270	SOD1 activity threshold and TOR signalling modulate VAP(P58S) aggregation via reactive oxygen species-induced proteasomal degradation in a Drosophila model of amyotrophic lateral sclerosis	2019
30630951	Aggregation of the nucleic acid-binding protein TDP-43 occurs via distinct routes that are coordinated with stress granule formation	2019
30622123	Experimental Mutations in Superoxide Dismutase 1 Provide Insight into Potential Mechanisms Involved in Aberrant Aggregation in Familial Amyotrophic Lateral Sclerosis	2019
30617154	Repeat-associated non-AUG translation in C9orf72-ALS/FTD is driven by neuronal excitation and stress	2019
30610612	Antisense Transcription in Loci Associated to Hereditary Neurodegenerative Diseases	2019
30594291	Meta-analysis of Genetic Modifiers Reveals Candidate Dysregulated Pathways in Amyotrophic Lateral Sclerosis	2019
30588220	A Small GTPase RHO2 Plays an Important Role in Pre-infection Development in the Rice Blast Pathogen Magnaporthe oryzae	2018
30586030	Facial Onset Motor and Sensory Neuronopathy Syndrome With a Novel TARDBP Mutation	2019
30583522	A Novel Mutation in the Stalk Domain of KIF5A Causes a Slowly Progressive Atypical Motor Syndrome	2018
30581417	KIF5A and ALS2 Variants in a Family With Hereditary Spastic Paraplegia and Amyotrophic Lateral Sclerosis	2018
30567526	The clinical assessment of amyotrophic lateral sclerosis patients' prognosis by ZNF512B gene, neck flexor muscle power score and body mass index (BMI)	2018
30564290	Properties of LINE-1 proteins and repeat element expression in the context of amyotrophic lateral sclerosis	2018
30556248	Chemicals, somatic mutations and neurodegeneration: evidence from Western Pacific amyotrophic lateral sclerosis-parkinsonism-dementia complex (ALS-PDC): Commentary on: Leija-Salazar M, Piette C, Proukakis C. Review: Somatic mutations in neurodegeneration. Neuropathol Appl Neurobiol 2018; 44: 267-85	2019
30554355	Heterogeneous brain FDG-PET metabolic patterns in patients with C9orf72 mutation	2019
30553531	Mutation screening of SLC52A3, C19orf12, and TARDBP in Iranian ALS patients	2019
30544007	A molecular dynamics based investigation reveals the role of rare Ribonuclease 4 variants in amyotrophic lateral sclerosis susceptibility	2019
30543828	Molecular binding response of naringin and naringenin to H46R mutant SOD1 protein in combating protein aggregation using density functional theory and discrete molecular dynamics	2019
30523038	Increased IP-10 production by blood-nerve barrier in multifocal acquired demyelinating sensory and motor neuropathy and multifocal motor neuropathy	2019
30534373	Rare TBK1 variants in patients with frontotemporal dementia and amyotrophic lateral sclerosis in a Chinese cohort	2018
30528349	Frontotemporal dementia spectrum: first genetic screen in a Greek cohort	2019
30528257	Tryptophan 32 mediates SOD1 toxicity in a in vivo motor neuron model of ALS and is a promising target for small molecule therapeutics	2019
30520513	TDP-43 accelerates deadenylation of target mRNAs by recruiting Caf1 deadenylase	2019
30507891	Clinical and Genetic Features of Patients with Juvenile Amyotrophic Lateral Sclerosis with Fused in Sarcoma (FUS) Mutation	2018
30506397	The applause sign in frontotemporal lobar degeneration and related conditions	2019
30503815	Resveratrol treatment reduces the vulnerability of SH-SY5Y cells and cortical neurons overexpressing SOD1-G93A to Thimerosal toxicity through SIRT1/DREAM/PDYN pathway	2019
30514811	Regulated proteolysis of p62/SQSTM1 enables differential control of autophagy and nutrient sensing	2018
30513241	50-Hz magnetic field impairs the expression of iron-related genes in the in vitro SOD1(G93A) model of amyotrophic lateral sclerosis	2019
30513214	Moral judgment in patients with behavioral variant of frontotemporal dementia and amyotrophic lateral sclerosis: no impairment of the moral position, but rather its execution	2019
30511086	Neurons selectively targeted in frontotemporal dementia reveal early stage TDP-43 pathobiology	2019
30501924	In ALS, a mutation could be worth two steps	2018
30485091	Three-Dimensional Activity Landscape Models of Different Design and Their Application to Compound Mapping and Potency Prediction	2019
30471417	Motor neuron degeneration, severe myopathy and TDP-43 increase in a transgenic pig model of SOD1-linked familiar ALS	2019
30461368	Neuromuscular junction abnormalities in a zebrafish loss-of-function model of TDP-43	2019
30461104	Dysregulation of TDP-43 intracellular localization and early onset ALS are associated with a TARDBP S375G variant	2019
30456350	Proteomics and C9orf72 neuropathology identify ribosomes as poly-GR/PR interactors driving toxicity	2018
30455313	ALS mutations of FUS suppress protein translation and disrupt the regulation of nonsense-mediated decay	2018
30447080	Increased risk of melanoma in C9ORF72 repeat expansion carriers: A case-control study	2019
30442662	Ubiquilin 2 modulates ALS/FTD-linked FUS-RNA complex dynamics and stress granule formation	2018
30439413	Cyclo(His-Pro) inhibits NLRP3 inflammasome cascade in ALS microglial cells	2019
30422940	Protein disulphide isomerase is associated with mutant SOD1 in canine degenerative myelopathy	2019
30415211	Characterising the phenotype and mode of inheritance of patients with inherited peripheral neuropathies carrying MME mutations	2018
30414557	Improved regression model to predict an impact of SOD1 mutations on ALS patients survival time based on analysis of hydrogen bond stability	2019
30409480	O'Sullivan-McLeod syndrome: Unmasking a rare atypical motor neuron disease	2019
30409191	Mutant UBQLN2(P497H) in motor neurons leads to ALS-like phenotypes and defective autophagy in rats	2018
30399166	Loss of charge mutations in solvent exposed Lys residues of superoxide dismutase 1 do not induce inclusion formation in cultured cell models	2018
30398641	The neurodegenerative diseases ALS and SMA are linked at the molecular level via the ASC-1 complex	2018
30397173	Deletion of a specific exon in the voltage-gated calcium channel gene cacophony disrupts locomotion in Drosophila larvae	2019
30376609	SecinH3 Attenuates TDP-43 p.Q331K-Induced Neuronal Toxicity by Suppressing Endoplasmic Reticulum Stress and Enhancing Autophagic Flux	2019
30368622	Quantum chemical and molecular mechanics studies on the assessment of interactions between resveratrol and mutant SOD1 (G93A) protein	2018
30368160	UNC13A polymorphism contributes to frontotemporal disease in sporadic amyotrophic lateral sclerosis	2019
30366341	Generation and characterization of a human iPSC line from an ALS patient carrying the Q66K-MATR3 mutation	2018
30355607	Neurite density is reduced in the presymptomatic phase of C9orf72 disease	2019
30355605	Burden of rare variants in causative genes for amyotrophic lateral sclerosis (ALS) accelerates age at onset of ALS	2019
30354839	The hnRNP RALY regulates PRMT1 expression and interacts with the ALS-linked protein FUS: implication for reciprocal cellular localization	2018
30349865	Variably protease-sensitive prionopathy presenting within ALS/FTD spectrum	2018
30349096	Amyotrophic Lateral Sclerosis associated FUS mutation shortens mitochondria and induces neurotoxicity	2018
30349065	Tryptophan 32-mediated SOD1 aggregation is attenuated by pyrimidine-like compounds in living cells	2018
30348461	Striking phenotypic variation in a family with the P506S UBQLN2 mutation including amyotrophic lateral sclerosis, spastic paraplegia, and frontotemporal dementia	2019
30342765	Analysis of CACNA1A CAG repeat lengths in patients with familial ALS	2019
30342764	Association of NIPA1 repeat expansions with amyotrophic lateral sclerosis in a large international cohort	2019
30341612	Induction of Cu/Zn Superoxide Dismutase (SOD1) Aggregation in Living Cells	2019
30341605	High-Throughput Microplate-Based Fluorescence Assays for Studying Stochastic Aggregation of Superoxide Dismutase-1	2019
30339961	Genetic activation of parkin rescues TAF15-induced neurotoxicity in a Drosophila model of amyotrophic lateral sclerosis	2019
30337194	Two rare variants of the ANXA11 gene identified in Chinese patients with amyotrophic lateral sclerosis	2019
30322899	Cortical correlates of behavioural change in amyotrophic lateral sclerosis	2019
30320576	Cerebrospinal Fluid Biomarkers in Patients with Frontotemporal Dementia Spectrum: A Single-Center Study	2018
30317490	ALS and CHARGE syndrome: a clinical and genetic study	2018
30315929	Microglial overexpression of fALS-linked mutant SOD1 induces SOD1 processing impairment, activation and neurotoxicity and is counteracted by the autophagy inducer trehalose	2018
30311446	Compound heterozygote mutations in the SIGMAR1 gene in an oldest-old patient with amyotrophic lateral sclerosis	2018
30305027	Non-target site-based resistance to tribenuron-methyl and essential involved genes in Myosoton aquaticum (L.)	2018
30301576	Mutation analysis of KIF5A in Chinese amyotrophic lateral sclerosis patients	2019
30298618	Target-site mutation accumulation among ALS inhibitor-resistant Palmer amaranth	2019
30293881	New findings in facial-onset sensory and motor neuronopathy (FOSMN) syndrome	2019
30283000	Protein-protein interactions reveal key canonical pathways, upstream regulators, interactome domains, and novel targets in ALS	2018
30279180	Structural characterization of the D290V mutation site in hnRNPA2 low-complexity-domain polymers	2018
30277522	NMR structure of a G-quadruplex formed by four d(G4C2) repeats: insights into structural polymorphism	2018
30270202	Younger age of onset in familial amyotrophic lateral sclerosis is a result of pathogenic gene variants, rather than ascertainment bias	2019
30260512	Comparative binding of kaempferol and kaempferide on inhibiting the aggregate formation of mutant (G85R) SOD1 protein in familial amyotrophic lateral sclerosis: A quantum chemical and molecular mechanics study	2018
30257969	Story of the ALS-FTD continuum retold: rather two distinct entities	2019
30257722	Astrocyte-based cell therapy: new hope for amyotrophic lateral sclerosis patients?	2018
30252044	A C6orf10/LOC101929163 locus is associated with age of onset in C9orf72 carriers	2018
30246111	Herbicide tolerance-assisted multiplex targeted nucleotide substitution in rice	2018
30239176	Are people with amyotrophic lateral sclerosis (ALS) particularly nice? An international online case-control study of the Big Five personality factors	2018
30236613	A novel p.Ser108LeufsTer15 SOD1 mutation leading to the formation of a premature stop codon in an apparently sporadic ALS patient: insights into the underlying pathomechanisms	2018
30224549	Different neuroinflammatory profile in amyotrophic lateral sclerosis and frontotemporal dementia is linked to the clinical phase	2019
30224357	Altered oligomeric states in pathogenic ALS2 variants associated with juvenile motor neuron diseases cause loss of ALS2-mediated endosomal function	2018
30210275	New Antibody-Free Mass Spectrometry-Based Quantification Reveals That C9ORF72 Long Protein Isoform Is Reduced in the Frontal Cortex of Hexanucleotide-Repeat Expansion Carriers	2018
30206963	Insights into the role of d-amino acid oxidase mutations in amyotrophic lateral sclerosis	2019
30206235	Mutant FUS causes DNA ligation defects to inhibit oxidative damage repair in Amyotrophic Lateral Sclerosis	2018
30196251	Patient with ALS with a novel TBK1 mutation, widespread brain involvement, behaviour changes and metabolic dysfunction	2019
30190267	Neuronal cell culture from transgenic zebrafish models of neurodegenerative disease	2018
30180501	Genetic testing in amyotrophic lateral sclerosis	2018
32328209	Custom-Fit Three-Dimensional-Printed BiPAP Mask to Improve Compliance in Patients Requiring Long-Term Noninvasive Ventilatory Support	2018
30166578	ALS-causing mutations in profilin-1 alter its conformational dynamics: A computational approach to explain propensity for aggregation	2018
30165075	Genetic screening of the genes interacting with Drosophila FIG4 identified a novel link between CMT-causing gene and long noncoding RNAs	2018
30157421	Pathogenic TFG Mutations Underlying Hereditary Spastic Paraplegia Impair Secretory Protein Trafficking and Axon Fasciculation	2018
30146930	A case of progressive non-fluent aphasia as onset of amyotrophic lateral sclerosis with frontotemporal dementia	2019
30144538	The relationship between four GWAS-identified loci in Alzheimer's disease and the risk of Parkinson's disease, amyotrophic lateral sclerosis, and multiple system atrophy	2018
30134252	Evaluation of Chitotriosidase and CC-Chemokine Ligand 18 as Biomarkers of Microglia Activation in Amyotrophic Lateral Sclerosis	2018
30128655	Clinical presentation and natural history of infantile-onset ascending spastic paralysis from three families with an ALS2 founder variant	2018
30127392	Modeling sporadic ALS in iPSC-derived motor neurons identifies a potential therapeutic agent	2018
30126445	Long-read sequencing across the C9orf72 'GGGGCC' repeat expansion: implications for clinical use and genetic discovery efforts in human disease	2018
30110532	Investigation of Anti-SOD1 Antibodies Yields New Structural Insight into SOD1 Misfolding and Surprising Behavior of the Antibodies Themselves	2018
30109267	Noncoding repeat expansions for ALS in Japan are associated with the ATXN8OS gene	2018
30103325	Three VCP Mutations in Patients with Frontotemporal Dementia	2018
30093141	Mutation screening of NEK1 in Chinese ALS patients	2018
30092269	Loss of MICOS complex integrity and mitochondrial damage, but not TDP-43 mitochondrial localisation, are likely associated with severity of CHCHD10-related diseases	2018
30092221	Hippo, Drosophila MST, is a novel modifier of motor neuron degeneration induced by knockdown of Caz, Drosophila FUS	2018
30089514	Joint genome-wide association study of progressive supranuclear palsy identifies novel susceptibility loci and genetic correlation to neurodegenerative diseases	2018
30088417	Mitochondrial DNA copy number and D-loop region methylation in carriers of amyotrophic lateral sclerosis gene mutations	2018
30084972	CHCHD2 accumulates in distressed mitochondria and facilitates oligomerization of CHCHD10	2018
30079398	SIGMAR1 gene mutation causing Distal Hereditary Motor Neuropathy in a Portuguese family	2018
30076267	Cognitive and behavioural changes in PLS and PMA:challenging the concept of restricted phenotypes	2019
30072963	Related Endogenous Retrovirus-K Elements Harbor Distinct Protease Active Site Motifs	2018
30068350	Transcriptional profiling of HERV-K(HML-2) in amyotrophic lateral sclerosis and potential implications for expression of HML-2 proteins	2018
30066483	Stacked traits conferring multiple resistance to imazamox and glufosinate in soft wheat	2019
30054789	Amyotrophic lateral sclerosis: the complex path to precision medicine	2018
30054184	Analysis of frontotemporal dementia, amyotrophic lateral sclerosis, and other dementia-related genes in 107 Korean patients with frontotemporal dementia	2018
30054183	Genetic analysis of ANXA11 variants in a Han Chinese cohort with amyotrophic lateral sclerosis in Taiwan	2018
30052327	A novel SETX gene mutation associated with Juvenile amyotrophic lateral sclerosis	2018
30045958	The multistep hypothesis of ALS revisited: The role of genetic mutations	2018
30037833	C9orf72 Dipeptide Repeats Cause Selective Neurodegeneration and Cell-Autonomous Excitotoxicity in Drosophila Glutamatergic Neurons	2018
30037610	Phenylalanine hydroxylase: A biomarker of disease susceptibility in Parkinson's disease and Amyotrophic lateral sclerosis	2018
30033073	ALS-associated missense and nonsense TBK1 mutations can both cause loss of kinase function	2018
30022503	STAYGREEN, STAY HEALTHY: a loss-of-susceptibility mutation in the STAYGREEN gene provides durable, broad-spectrum disease resistances for over 50 years of US cucumber production	2019
30015619	Matrin 3-dependent neurotoxicity is modified by nucleic acid binding and nucleocytoplasmic localization	2018
30014597	CHCHD10 variants in amyotrophic lateral sclerosis: Where is the evidence?	2018
30014505	Neurofilament light: A candidate biomarker of presymptomatic amyotrophic lateral sclerosis and phenoconversion	2018
30010465	Loss of the novel Vcp (valosin containing protein) interactor Washc4 interferes with autophagy-mediated proteostasis in striated muscle and leads to myopathy in vivo	2018
30008669	Screening for CCNF Mutations in a Chinese Amyotrophic Lateral Sclerosis Cohort	2018
30005904	Novel VCP mutations expand the mutational spectrum of frontotemporal dementia	2018
29995611	WDR41 supports lysosomal response to changes in amino acid availability	2018
29983743	A pyruvate carbon flux tugging strategy for increasing 2,3-butanediol production and reducing ethanol subgeneration in the yeast Saccharomyces cerevisiae	2018
29956241	Single-Molecule and Ensemble Methods to Probe Initial Stages of RNP Granule Assembly	2018
29955893	Synthesis-dependent repair of Cpf1-induced double strand DNA breaks enables targeted gene replacement in rice	2018
29955173	Project MinE: study design and pilot analyses of a large-scale whole-genome sequencing study in amyotrophic lateral sclerosis	2018
29954873	Mutation screening of the KIF5A gene in Chinese patients with amyotrophic lateral sclerosis	2019
29949596	Overexpression of cytochrome P450s in a lambda-cyhalothrin resistant population of Apolygus lucorum (Meyer-Dür)	2018
29946510	SPG11 mutations cause widespread white matter and basal ganglia abnormalities, but restricted cortical damage	2018
29938835	Colocalization of Bunina bodies and TDP-43 inclusions in a case of sporadic amyotrophic lateral sclerosis with Lewy body-like hyaline inclusions	2018
29936333	Depletion of Ubiquilin induces an augmentation in soluble ubiquitinated Drosophila TDP-43 to drive neurotoxicity in the fly	2018
29929116	NEK1 loss-of-function mutation induces DNA damage accumulation in ALS patient-derived motoneurons	2018
29928714	TARDBP p.G376D mutation, found in rapid progressive familial ALS, induces mislocalization of TDP-43	2018
29912613	Cryptic exon splicing function of TARDBP interacts with autophagy in nervous tissue	2018
29907119	Efficient production of 1,3-propanediol from crude glycerol by repeated fed-batch fermentation strategy of a lactate and 2,3-butanediol deficient mutant of Klebsiella pneumoniae	2018
29904341	Medium-Chain Fatty Acids, Beta-Hydroxybutyric Acid and Genetic Modulation of the Carnitine Shuttle Are Protective in a Drosophila Model of ALS Based on TDP-43	2018
29899994	Two novel VCP missense variants identified in Japanese patients with multisystem proteinopathy	2018
29895397	Targeted next-generation sequencing reveals novel and rare variants in Indian patients with amyotrophic lateral sclerosis	2018
29891719	Regulation of a distinct activated RIPK1 intermediate bridging complex I and complex II in TNFα-mediated apoptosis	2018
29891363	Fenoxaprop-P-ethyl and mesosulfuron-methyl resistance status of shortawn foxtail (Alopecurus aequalis Sobol.) in eastern China	2018
29889265	Systematic Screening of Ubiquitin/p62 Aggregates in Cerebellar Cortex Expands the Neuropathological Phenotype of the C9orf72 Expansion Mutation	2018
29886477	Distinct Clinical Features and Outcomes in Motor Neuron Disease Associated with Behavioural Variant Frontotemporal Dementia	2018
29886022	No supportive evidence for TIA1 gene mutations in a European cohort of ALS-FTD spectrum patients	2018
29884807	Interactome analyses revealed that the U1 snRNP machinery overlaps extensively with the RNAP II machinery and contains multiple ALS/SMA-causative proteins	2018
29881358	Effect of Mutated Cu, Zn Superoxide Dismutase (SOD1(G93A)) on Modulation of Transductional Pathway Mediated by M1 Muscarinic Receptor in SK-N-BE and NSC-34 Cells	2018
29879491	Exploring the selective vulnerability in Alzheimer disease using tissue specific variant analysis	2019
29872735	Analysis of the substrate recognition state of TDP-43 to single-stranded DNA using fluorescence correlation spectroscopy	2018
29869502	In-Cell NMR in Human Cells: Direct Protein Expression Allows Structural Studies of Protein Folding and Maturation	2018
29868986	Agronomic evaluation and molecular characterisation of the acetolactate synthase gene in imazapyr tolerant sugarcane (Saccharum hybrid) genotypes	2018
29866399	Clinical features and genetic characterization of two dizygotic twins with C9orf72 expansion	2018
29866003	The Effect of Single and Double Acetylation of Lysine Residues on Structural and Dynamical Features of Human Splicing Factor TDP-43 - A Statistical Ensemble Analysis	2018
29861044	Frequency of C9orf72 hexanucleotide repeat expansion and SOD1 mutations in Portuguese patients with amyotrophic lateral sclerosis	2018
29859640	Genetic screening in early-onset dementia patients with unclear phenotype: relevance for clinical diagnosis	2018
29845112	ANXA11 mutations prevail in Chinese ALS patients with and without cognitive dementia	2018
29808621	Target site mutations and cytochrome P450s confer resistance to fenoxaprop-P-ethyl and mesosulfuron-methyl in Alopecurus aequalis	2019
29801890	Mutational analysis of TARDBP gene in patients affected by Parkinson's disease from Calabria	2018
29800782	Motor neuron differentiation of iPSCs obtained from peripheral blood of a mutant TARDBP ALS patient	2018
29797476	Molecular and physiological characterization of six-way resistance in an Amaranthus tuberculatus var. rudis biotype from Missouri	2018
29792928	Translation of dipeptide repeat proteins from the C9ORF72 expanded repeat is associated with cellular stress	2018
29789341	A novel CHCHD10 mutation implicates a Mia40-dependent mitochondrial import deficit in ALS	2018
29786080	Atomic structures of TDP-43 LCD segments and insights into reversible or pathogenic aggregation	2018
29785360	Identical patterns of cortico-efferent tract involvement in primary lateral sclerosis and amyotrophic lateral sclerosis: A tract of interest-based MRI study	2018
29784880	Arginine methylation of translocated in liposarcoma (TLS) inhibits its binding to long noncoding RNA, abrogating TLS-mediated repression of CBP/p300 activity	2018
29779896	All-Optical Electrophysiology for High-Throughput Functional Characterization of a Human iPSC-Derived Motor Neuron Model of ALS	2018
29778779	FTLD/ALS-linked TDP-43 mutations do not alter TDP-43's ability to self-regulate its expression in Drosophila	2018
29778643	Inheritance of co-edited genes by CRISPR-based targeted nucleotide substitutions in rice	2018
29773329	Mutation screening of the TIA1 gene in Chinese patients with amyotrophic lateral sclerosis/frontotemporal dementia	2018
29770363	The multifaceted clinical presentation of VCP-proteinopathy in a Greek family	2017
29769403	Unmasking the skiptic task of TDP-43	2018
29760185	Stability of an aggregation-prone partially folded state of human profilin-1 correlates with aggregation propensity	2018
29754758	Novel valosin-containing protein mutations associated with multisystem proteinopathy	2018
29751289	Perfusion alterations converge with patterns of pathological spread in transactive response DNA-binding protein 43 proteinopathies	2018
29751083	The amyloidogenicity of a C-terminal region of TDP-43 implicated in Amyotrophic Lateral Sclerosis can be affected by anions, acetylation and homodimerization	2018
29750243	C9ORF72 dipeptide repeat poly-GA inclusions promote intracellular aggregation of phosphorylated TDP-43	2018
29749507	Identification of CHCHD2 mutations in patients with Alzheimer's disease, amyotrophic lateral sclerosis and frontotemporal dementia in China	2018
29748771	Inhibition impairment in frontotemporal dementia, amyotrophic lateral sclerosis, and Alzheimer's disease: clinical assessment and metabolic correlates	2019
29742622	Fluorescence in-situ hybridization method reveals that carboxyl-terminal fragments of transactive response DNA-binding protein-43 truncated at the amino acid residue 218 reduce poly(A)+ RNA expression	2018
29731301	A C9orf72 ALS/FTD Ortholog Acts in Endolysosomal Degradation and Lysosomal Homeostasis	2018
29729503	Direct conversion of human pluripotent stem cells into cranial motor neurons using a piggyBac vector	2018
29728564	Nuclear egress of TDP-43 and FUS occurs independently of Exportin-1/CRM1	2018
29710810	Exploring microRNA Biomarker for Amyotrophic Lateral Sclerosis	2018
29706887	The rs696880 Polymorphism in the Nogo-A Receptor Gene (RTN4R) Is Associated With Susceptibility to Sporadic Amyotrophic Lateral Sclerosis in the Chinese Population	2018
29701791	The snowball effect of RNA binding protein dysfunction in amyotrophic lateral sclerosis	2018
29699721	Genetic analysis of TIA1 gene in Chinese patients with amyotrophic lateral sclerosis	2018
29697967	Handling Different Spatial Resolutions in Image Fusion by Multivariate Curve Resolution-Alternating Least Squares for Incomplete Image Multisets	2018
29686043	TFE-induced local unfolding and fibrillation of SOD1: bridging the experiment and simulation studies	2018
29685899	Multicentre, cross-cultural, population-based, case-control study of physical activity as risk factor for amyotrophic lateral sclerosis	2018
29685649	Polygenic link between blood lipids and amyotrophic lateral sclerosis	2018
29684153	Determination of cytoplasmic optineurin foci sizes using image correlation spectroscopy	2018
29679384	Assessment of ligand binding at a site relevant to SOD1 oxidation and aggregation	2018
29677514	Phase Separation of FUS Is Suppressed by Its Nuclear Import Receptor and Arginine Methylation	2018
29677512	Nuclear-Import Receptors Reverse Aberrant Phase Transitions of RNA-Binding Proteins with Prion-like Domains	2018
29666246	Large SOD1 aggregates, unlike trimeric SOD1, do not impact cell viability in a model of amyotrophic lateral sclerosis	2018
29661904	Increased cerebral functional connectivity in ALS: A resting-state magnetoencephalography study	2018
29653372	Letter to the Editor: History and clinical implications of PAPP-A2 in human growth: When reflecting on idiopathic short stature leads to a specific and new diagnosis: Understanding the concept of "low IGF-I availability"	2018
29652484	Metabolic Resistance to Acetolactate Synthase Inhibiting Herbicide Tribenuron-Methyl in Descurainia sophia L. Mediated by Cytochrome P450 Enzymes	2018
29650794	Comprehensive analysis of the mutation spectrum in 301 German ALS families	2018
29649360	Glycerolipid Headgroups Control Rate and Mechanism of Superoxide Dismutase-1 Aggregation and Accelerate Fibrillization of Slowly Aggregating Amyotrophic Lateral Sclerosis Mutants	2018
29645329	Modulating the Folding Landscape of Superoxide Dismutase 1 with Targeted Molecular Binders	2018
29630989	Age-dependent neurodegeneration and organelle transport deficiencies in mutant TDP43 patient-derived neurons are independent of TDP43 aggregation	2018
29628370	The ER Contact Proteins VAPA/B Interact with Multiple Autophagy Proteins to Modulate Autophagosome Biogenesis	2018
29625118	FUS causes synaptic hyperexcitability in Drosophila dendritic arborization neurons	2018
29621978	High frequency of the TARDBP p.M337 V mutation among south-eastern Chinese patients with familial amyotrophic lateral sclerosis	2018
29611543	Intracellular trafficking of TREM2 is regulated by presenilin 1	2017
29609497	A novel D90_K91insN mutation in exon 4 of the SOD1 gene caused familial amyotrophic lateral sclerosis in a Chinese pedigree	2018
29606582	Kir4.1-Dependent Astrocyte-Fast Motor Neuron Interactions Are Required for Peak Strength	2018
29599716	Atrophy in the Thalamus But Not Cerebellum Is Specific for C9orf72 FTD and ALS Patients - An Atlas-Based Volumetric MRI Study	2018
29593496	Q-Rich Yeast Prion [PSI(+)] Accelerates Aggregation of Transthyretin, a Non-Q-Rich Human Protein	2018
29566793	Genome-wide Analyses Identify KIF5A as a Novel ALS Gene	2018
29564924	Identification of an A4V SOD1 mutation in a Chinese patient with amyotrophic lateral sclerosis without the A4V founder effect common in North America	2018
29564728	Determining the Effect of the HNMT, STK39, and NMD3 Polymorphisms on the Incidence of Parkinson's Disease, Amyotrophic Lateral Sclerosis, and Multiple System Atrophy in Chinese Populations	2018
29562314	TDP-43 regulates the alternative splicing of hnRNP A1 to yield an aggregation-prone variant in amyotrophic lateral sclerosis	2018
29560381	Nucleocytoplasmic transport defect in a North American patient with ALS8	2018
29558868	Identification of compound heterozygous variants in OPTN in an ALS-FTD patient from the CReATe consortium: a case report	2018
29557178	TREM2 variants in neurodegenerative disorders in the Polish population. Homozygosity and compound heterozygosity in FTD patients	2018
29554190	A 2-Step Cerebrospinal Algorithm for the Selection of Frontotemporal Lobar Degeneration Subtypes	2018
29552439	The natural history of hereditary motor and sensory neuropathy with proximal dominant involvement (HMSN-P) in 97 Japanese patients	2018
29540513	Screening for TUBA4A mutations in a large Chinese cohort of patients with ALS: re-evaluating the pathogenesis of TUBA4A in ALS	2018
29531866	Overexpression of ter94, Drosophila VCP, improves motor neuron degeneration induced by knockdown of TBPH, Drosophila TDP-43	2018
29525178	Twenty years of molecular analyses in amyotrophic lateral sclerosis: genetic landscape of Italian patients	2018
29519717	Mutation analysis of CHCHD2 and CHCHD10 in Italian patients with mitochondrial myopathy	2018
29513014	RNA and Protein Interactors with TDP-43 in Human Spinal-Cord Lysates in Amyotrophic Lateral Sclerosis	2018
29511296	Characterization of gene regulation and protein interaction networks for Matrin 3 encoding mutations linked to amyotrophic lateral sclerosis and myopathy	2018
29511089	TAR DNA-binding protein 43 (TDP-43) liquid-liquid phase separation is mediated by just a few aromatic residues	2018
29493298	Phenotypic and genotypic studies of ALS cases in ALS-SMA families	2018
29492846	K(ATP) Channel Expression and Genetic Polymorphisms Associated with Progression and Survival in Amyotrophic Lateral Sclerosis	2018
29490429	Phylogenetic spread of sequence data affects fitness of SOD1 consensus enzymes: Insights from sequence statistics and structural analyses	2018
29486010	The cellular uptake of angiogenin, an angiogenic and neurotrophic factor is through multiple pathways and largely dynamin independent	2018
29483249	Effects of maturation on the conformational free-energy landscape of SOD1	2018
29480190	The First Historically Reported Italian Family with FTD/ALS Teaches a Lesson on C9orf72 RE: Clinical Heterogeneity and Oligogenic Inheritance	2018
29476441	Association Between Body Mass Index and Disease Severity in Chinese Spinocerebellar Ataxia Type 3 Patients	2018
29464931	New FIG4 gene mutations causing aggressive ALS	2018
29457785	TIA1 variant drives myodegeneration in multisystem proteinopathy with SQSTM1 mutations	2018
29453800	Atomic structures of corkscrew-forming segments of SOD1 reveal varied oligomer conformations	2018
29453415	ERLIN1 mutations cause teenage-onset slowly progressive ALS in a large Turkish pedigree	2018
29449030	The frequency of the C9orf72 expansion in a Brazilian population	2018
29439163	The cognitive profile of behavioural variant FTD and its similarities with ALS: a systematic review and meta-analysis	2018
29438978	A single N-terminal phosphomimic disrupts TDP-43 polymerization, phase separation, and RNA splicing	2018
29434138	Amyotrophic Lateral Sclerosis after Receiving the Human Papilloma Virus Vaccine: A Case Report of a 15-year-old Girl	2018
29431095	Molecular mechanisms underlying the impact of mutations in SOD1 on its conformational properties associated with amyotrophic lateral sclerosis as revealed with molecular modelling	2018
29426546	A chemometric approach for characterization of serum transthyretin in familial amyloidotic polyneuropathy type I (FAP-I) by electrospray ionization-ion mobility mass spectrometry	2018
29425337	Self-assembly of FUS through its low-complexity domain contributes to neurodegeneration	2018
29423814	Connectivity-based characterisation of subcortical grey matter pathology in frontotemporal dementia and ALS: a multimodal neuroimaging study	2018
29419416	Lymphoblastoid cell lines as a model to understand amyotrophic lateral sclerosis disease mechanisms	2018
29416069	Senataxin resolves RNA:DNA hybrids forming at DNA double-strand breaks to prevent translocations	2018
29411640	Screening for possible oligogenic pathogenesis in Chinese sporadic ALS patients	2018
29409023	ERp57 is protective against mutant SOD1-induced cellular pathology in amyotrophic lateral sclerosis	2018
29402965	Characterizations of distinct parallel and antiparallel G-quadruplexes formed by two-repeat ALS and FTD related GGGGCC sequence	2018
29398122	Frequency and characteristics of the TBK1 gene variants in Japanese patients with sporadic amyotrophic lateral sclerosis	2018
29398120	Screening of GLE1 mutations in Chinese amyotrophic lateral sclerosis patients	2018
29395064	Senataxin Mutation Reveals How R-Loops Promote Transcription by Blocking DNA Methylation at Gene Promoters	2018
29394115	Structural insights into the ubiquitin recognition by OPTN (optineurin) and its regulation by TBK1-mediated phosphorylation	2018
29380416	Astrocytes expressing ALS-linked mutant FUS induce motor neuron death through release of tumor necrosis factor-alpha	2018
29379112	Downregulation of glutamic acid decarboxylase in Drosophila TDP-43-null brains provokes paralysis by affecting the organization of the neuromuscular synapses	2018
29373831	Context-Dependent and Disease-Specific Diversity in Protein Interactions within Stress Granules	2018
29371591	MIF inhibits the formation and toxicity of misfolded SOD1 amyloid aggregates: implications for familial ALS	2018
29370934	Mutation analysis of the TIA1 gene in Chinese patients with amyotrophic lateral sclerosis and frontotemporal dementia	2018
29369331	Alterations in local stability and dynamics of A4V SOD1 in the presence of trifluoroethanol	2018
29367641	C9ORF72 repeat expansion causes vulnerability of motor neurons to Ca(2+)-permeable AMPA receptor-mediated excitotoxicity	2018
29367447	Unraveling ALS due to SOD1 mutation through the combination of brain and cervical cord MRI	2018
29362359	Impaired DNA damage response signaling by FUS-NLS mutations leads to neurodegeneration and FUS aggregate formation	2018
29358076	Mechanistic View of hnRNPA2 Low-Complexity Domain Structure, Interactions, and Phase Separation Altered by Mutation and Arginine Methylation	2018
29352617	High frequency of C9orf72 hexanucleotide repeat expansion in amyotrophic lateral sclerosis patients from two founder populations sharing the same risk haplotype	2018
29352102	Teenage-onset progressive myoclonic epilepsy due to a familial C9orf72 repeat expansion	2018
29342275	Hot-spot KIF5A mutations cause familial ALS	2018
29332010	Oligogenic genetic variation of neurodegenerative disease genes in 980 postmortem human brains	2018
29331073	Cerebrospinal fluid macrophage biomarkers in amyotrophic lateral sclerosis	2018
29323119	CUG initiation and frameshifting enable production of dipeptide repeat proteins from ALS/FTD C9ORF72 transcripts	2018
29315334	Immune-related genetic enrichment in frontotemporal dementia: An analysis of genome-wide association studies	2018
29279004	Insights into the role of ribonuclease 4 polymorphisms in amyotrophic lateral sclerosis	2019
29274668	ATXN1 intermediate-length polyglutamine expansions are associated with amyotrophic lateral sclerosis	2018
29272468	Multiple Proteinopathies in Familial ALS Cases With Optineurin Mutations	2018
29269637	The First Report of a Japanese Case of Seipinopathy with a BSCL2 N88S Mutation	2018
29264395	Factors influencing the age at onset in familial frontotemporal lobar dementia: Important weight of genetics	2017
29260601	An association study between SCFD1 rs10139154 variant and amyotrophic lateral sclerosis in a Chinese cohort	2018
29254092	Lipid Metabolism and Survival Across the Frontotemporal Dementia-Amyotrophic Lateral Sclerosis Spectrum: Relationships to Eating Behavior and Cognition	2018
31225447	Therapeutic potential of HDAC6 in amyotrophic lateral sclerosis	2017
29247619	A new Drosophila model of Ubiquilin knockdown shows the effect of impaired proteostasis on locomotive and learning abilities	2018
29235362	Reconsidering the causality of TIA1 mutations in ALS	2018
29234345	A New Ala-122-Asn Amino Acid Change Confers Decreased Fitness to ALS-Resistant Echinochloa crus-galli	2017
29234142	A molecular chaperone activity of CCS restores the maturation of SOD1 fALS mutants	2017
29220677	A Powerful Approach to Estimating Annotation-Stratified Genetic Covariance via GWAS Summary Statistics	2017
29216908	Clinical and neuropathological features of ALS/FTD with TIA1 mutations	2017
29216901	Genomic variants in the FTO gene are associated with sporadic amyotrophic lateral sclerosis in Greek patients	2017
29212830	Multicenter evaluation of neurofilaments in early symptom onset amyotrophic lateral sclerosis	2018
29203801	De novo design of RNA-binding proteins with a prion-like domain related to ALS/FTD proteinopathies	2017
29197216	Early Cognitive, Structural, and Microstructural Changes in Presymptomatic C9orf72 Carriers Younger Than 40 Years	2018
29191947	A proteomic network approach across the ALS-FTD disease spectrum resolves clinical phenotypes and genetic vulnerability in human brain	2018
29170628	Targeted Genetic Screen in Amyotrophic Lateral Sclerosis Reveals Novel Genetic Variants with Synergistic Effect on Clinical Phenotype	2017
29166782	Screening for the C9ORF72 repeat expansion in a greek frontotemporal dementia cohort	2018
29161404	Mutation-dependent aggregation and toxicity in a Drosophila model for UBQLN2-associated ALS	2018
29157189	Molecular dynamics of a far positioned SOD1 mutant V14M reveals pathogenic misfolding behavior	2018
29149916	Whole-exome sequencing in amyotrophic lateral sclerosis suggests NEK1 is a risk gene in Chinese	2017
29148165	Dinitroaniline herbicide resistance in a multiple-resistant Lolium rigidum population	2018
29146049	Common and rare TBK1 variants in early-onset Alzheimer disease in a European cohort	2018
29140459	RBM45 competes with HDAC1 for binding to FUS in response to DNA damage	2017
29137817	Beyond ALS and FTD: the phenotypic spectrum of TBK1 mutations includes PSP-like and cerebellar phenotypes	2018
29134320	Artificial intelligence in neurodegenerative disease research: use of IBM Watson to identify additional RNA-binding proteins altered in amyotrophic lateral sclerosis	2018
29131982	Multimodal MRI quantification of the common neurostructural bases within the FTD-ALS continuum	2018
29131108	Genetic and Pathological Assessment of hnRNPA1, hnRNPA2/B1, and hnRNPA3 in Familial and Sporadic Amyotrophic Lateral Sclerosis	2017
29131016	Focal Transplantation of Aberrant Glial Cells Carrying the SOD1G93A Mutation into Rat Spinal Cord Induces Extensive Gliosis	2017
29129529	Profilin Directly Promotes Microtubule Growth through Residues Mutated in Amyotrophic Lateral Sclerosis	2017
29128630	Association analysis of SNP rs11868035 in SREBF1 with sporadic Parkinson's disease, sporadic amyotrophic lateral sclerosis and multiple system atrophy in a Chinese population	2018
29128563	Matrin 3 Is a Component of Neuronal Cytoplasmic Inclusions of Motor Neurons in Sporadic Amyotrophic Lateral Sclerosis	2018
29121515	The genetic basis underlying variation in production of the flavour compound diacetyl by Lactobacillus rhamnosus strains in milk	2018
29121267	Loss of CHCHD10-CHCHD2 complexes required for respiration underlies the pathogenicity of a CHCHD10 mutation in ALS	2018
29109432	ALS Associated Mutations in Matrin 3 Alter Protein-Protein Interactions and Impede mRNA Nuclear Export	2017
29107252	Trp574 substitution in the acetolactate synthase of Sinapis arvensis confers cross-resistance to tribenuron and imazamox	2017
29107233	Comparison of ALS functionality and plant growth in ALS-inhibitor susceptible and resistant Myosoton aquaticum L	2017
29103041	Association of the New Variant Tyr424Asp at TBK1 Gene with Amyotrophic Lateral Sclerosis and Cognitive Decline	2018
29102476	Investigating CCNF mutations in a Taiwanese cohort with amyotrophic lateral sclerosis	2018
29095328	C9ORF72 Intermediate Repeat Expansion in a Patient With Psychiatric Disorders and Progressive Cerebellar Ataxia	2017
29093532	Multiple mechanisms are involved in new imazamox-resistant varieties of durum and soft wheat	2017
29091718	Analysis of neurodegenerative Mendelian genes in clinically diagnosed Alzheimer Disease	2017
29086072	GNE missense mutation in recessive familial amyotrophic lateral sclerosis	2017
29082510	Brain signal intensity changes as biomarkers in amyotrophic lateral sclerosis	2018
29080331	OPTN p.Met468Arg and ATXN2 intermediate length polyQ extension in families with C9orf72 mediated amyotrophic lateral sclerosis and frontotemporal dementia	2018
29071208	Fast progressive lower motor neuron disease is an ALS variant: A two-centre tract of interest-based MRI data analysis	2017
29065921	Fibroblast bioenergetics to classify amyotrophic lateral sclerosis patients	2017
29054917	Longitudinal diffusion imaging across the C9orf72 clinical spectrum	2018
29053860	Clinicopathological correlations in behavioural variant frontotemporal dementia	2017
29053667	Assay Development for High Content Quantification of Sod1 Mutant Protein Aggregate Formation in Living Cells	2017
29037990	Roles for the VCP co-factors Npl4 and Ufd1 in neuronal function in Drosophila melanogaster	2017
29036691	Nuclear localized C9orf72-associated arginine-containing dipeptides exhibit age-dependent toxicity in C. elegans	2017
29035885	ALS-Related Mutant FUS Protein Is Mislocalized to Cytoplasm and Is Recruited into Stress Granules of Fibroblasts from Asymptomatic FUS P525L Mutation Carriers	2017
29033165	Molecular epidemiological study of familial amyotrophic lateral sclerosis in Japanese population by whole-exome sequencing and identification of novel HNRNPA1 mutation	2018
29031901	Als and Ftd: Insights into the disease mechanisms and therapeutic targets	2017
29021520	HDAC6 inhibition reverses axonal transport defects in motor neurons derived from FUS-ALS patients	2017
29021214	Casein kinase II phosphorylation of cyclin F at serine 621 regulates the Lys48-ubiquitylation E3 ligase activity of the SCF((cyclin F)) complex	2017
28993872	A novel mutation of VAPB in one Chinese familial amyotrophic lateral sclerosis pedigree and its clinical characteristics	2017
28991661	Behavioral and affective features of amyotrophic lateral sclerosis patients	2017
28988989	FUS Mutant Human Motoneurons Display Altered Transcriptome and microRNA Pathways with Implications for ALS Pathogenesis	2017
28973139	Homeostatic plasticity can be induced and expressed to restore synaptic strength at neuromuscular junctions undergoing ALS-related degeneration	2017
28969660	Novel miR-b2122 regulates several ALS-related RNA-binding proteins	2017
28969372	Novel insights in the disease biology of mutant small heat shock proteins in neuromuscular diseases	2017
28952073	Cysteine to Serine Conversion at 111th Position Renders the Disaggregation and Retains the Stabilization of Detrimental SOD1 A4V Mutant Against Amyotrophic Lateral Sclerosis in Human-A Discrete Molecular Dynamics Study	2018
28950184	Regression model for predicting pathogenic properties of SOD1 mutants based on the analysis of conformational stability and conservation of hydrogen bonds	2017
28936769	NLRP3 Inflammasome Activation in a Transgenic Amyotrophic Lateral Sclerosis Model	2018
28935222	NEK1 genetic variability in a Belgian cohort of ALS and ALS-FTD patients	2018
28917980	Absence of association of the Ala58Val (rs17571) CTSD gene variant with Parkinson's disease or amyotrophic lateral sclerosis in a Han Chinese population	2018
28912432	Mitigating Motor Neuronal Loss in C. elegans Model of ALS8	2017
28889094	Analysis of known amyotrophic lateral sclerosis and frontotemporal dementia genes reveals a substantial genetic burden in patients manifesting both diseases not carrying the C9orf72 expansion mutation	2018
28884318	Implications of fALS Mutations on Sod1 Function and Oligomerization in Cell Models	2018
28877271	Spinal cord homogenates from SOD1 familial amyotrophic lateral sclerosis induce SOD1 aggregation in living cells	2017
28872040	Structural magnetic resonance imaging in frontotemporal lobar dementia	2017
28864831	Ultrastructural features of aberrant glial cells isolated from the spinal cord of paralytic rats expressing the amyotrophic lateral sclerosis-linked SOD1G93A mutation	2017
28861801	Intercellular Prion-Like Conversion and Transmission of Cu/Zn Superoxide Dismutase (SOD1) in Cell Culture	2017
28861673	SOD1 Mutations Causing Familial Amyotrophic Lateral Sclerosis Induce Toxicity in Astrocytes: Evidence for Bystander Effects in a Continuum of Astrogliosis	2018
28859526	Increase in DNA methylation in patients with amyotrophic lateral sclerosis carriers of not fully penetrant SOD1 mutations	2018
28859337	Amygdala TDP-43 Pathology in Frontotemporal Lobar Degeneration and Motor Neuron Disease	2017
28852778	Pathogenic mutation in the ALS/FTD gene, CCNF, causes elevated Lys48-linked ubiquitylation and defective autophagy	2018
28847504	ALS-causing profilin-1-mutant forms a non-native helical structure in membrane environments	2017
28828346	Hirayama's Disease: A Rare Clinical Variant of Amyotrophic Lateral Sclerosis	2017
28827549	Susceptible genes and disease mechanisms identified in frontotemporal dementia and frontotemporal dementia with Amyotrophic Lateral Sclerosis by DNA-methylation and GWAS	2017
28822984	TBK1 mutations in Italian patients with amyotrophic lateral sclerosis: genetic and functional characterisation	2017
28817800	TIA1 Mutations in Amyotrophic Lateral Sclerosis and Frontotemporal Dementia Promote Phase Separation and Alter Stress Granule Dynamics	2017
28812062	Clinical and experimental studies of a novel P525R FUS mutation in amyotrophic lateral sclerosis	2017
28797086	Epigenetic differences between monozygotic twins discordant for amyotrophic lateral sclerosis (ALS) provide clues to disease pathogenesis	2017
28795874	Lack of association between the P413L variant of chromogranin B and ALS risk or age at onset: a meta-analysis	2018
28793209	Structural Rearrangement upon Fragmentation of the Stability Core of the ALS-Linked Protein TDP-43	2017
28792508	DCTN1 gene analysis in Chinese patients with sporadic amyotrophic lateral sclerosis	2017
28790177	Phosphorylation of the FUS low-complexity domain disrupts phase separation, aggregation, and toxicity	2017
28789478	Perry Syndrome: A Distinctive Type of TDP-43 Proteinopathy	2017
28771349	Understanding the Differential Response of Setaria viridis L. (green foxtail) and Setaria pumila Poir. (yellow foxtail) to Pyroxsulam	2017
28768772	A computational combinatorial approach identifies a protein inhibitor of superoxide dismutase 1 misfolding, aggregation, and cytotoxicity	2017
28767243	Occurrence of Different Resistance Mechanisms to Acetolactate Synthase Inhibitors in European Sorghum halepense	2017
28766957	Immunohistochemical detection of C9orf72 protein in frontotemporal lobar degeneration and motor neurone disease: patterns of immunostaining and an evaluation of commercial antibodies	2018
28760994	Atomic structure of a toxic, oligomeric segment of SOD1 linked to amyotrophic lateral sclerosis (ALS)	2017
28755697	Proteomic and biochemical assays of glutathione-related proteins in susceptible and multiple herbicide resistant Avena fatua L	2017
28748847	Clinical Features of Isolated Bulbar Palsy of Amyotrophic Lateral Sclerosis in Chinese Population	2017
28740063	Difficulty in determining the association of a single nucleotide polymorphism in the ZNF512B gene with the risk and prognosis of amyotrophic lateral sclerosis	2017
28739864	Late-onset Tay-Sachs disease	2017
28738414	Impact of Amyotrophic Lateral Sclerosis on Slow Tonic Myofiber Composition in Human Extraocular Muscles	2017
28738334	Time Course of Radiological Imaging and Variable Interindividual Symptoms in Amyotrophic Lateral Sclerosis and Frontotemporal Dementia Associated with p.Arg487His Mutation in the VCP Gene	2017
28734097	First report of Ser653Asn mutation endowing high-level resistance to imazamox in downy brome (Bromus tectorum L.)	2017
28725696	Creation of a library of induced pluripotent stem cells from Parkinsonian patients	2016
28717666	Whole exome sequencing and DNA methylation analysis in a clinical amyotrophic lateral sclerosis cohort	2017
28716533	Novel UBQLN2 mutations linked to amyotrophic lateral sclerosis and atypical hereditary spastic paraplegia phenotype through defective HSP70-mediated proteolysis	2017
28716262	New genetic causes for complex hereditary spastic paraplegia	2017
35650873	Development of Excipient-Free Freeze-Dryable Unimolecular Hyperstar Polymers for Efficient siRNA Silencing	2017
28715630	Misfolded SOD1 Accumulation and Mitochondrial Association Contribute to the Selective Vulnerability of Motor Neurons in Familial ALS: Correlation to Human Disease	2017
28714244	The role of de novo mutations in the development of amyotrophic lateral sclerosis	2017
28709720	Burden of rare variants in ALS genes influences survival in familial and sporadic ALS	2017
28709447	Cryptic amyloidogenic elements in mutant NEFH causing Charcot-Marie-Tooth 2 trigger aggresome formation and neuronal death	2017
28705014	Mutation in the RRM2 domain of TDP-43 in Amyotrophic Lateral Sclerosis with rapid progression associated with ubiquitin positive aggregates in cultured motor neurons	2018
28703943	Target-site resistance to acetolactate synthase (ALS)-inhibiting herbicides in Amaranthus palmeri from Argentina	2017
28696262	Human serine racemase structure/activity relationship studies provide mechanistic insight and point to position 84 as a hot spot for β-elimination function	2017
28692196	Genotype-phenotype study in patients with valosin-containing protein mutations associated with multisystem proteinopathy	2018
28686708	Drosophila lines with mutant and wild type human TDP-43 replacing the endogenous gene reveals phosphorylation and ubiquitination in mutant lines in the absence of viability or lifespan defects	2017
28680046	Computing disease-linked SOD1 mutations: deciphering protein stability and patient-phenotype relations	2017
28643897	A novel amino acid substitution Trp574Arg in acetolactate synthase (ALS) confers broad resistance to ALS-inhibiting herbicides in crabgrass (Digitaria sanguinalis)	2017
28642336	The evolving genetic risk for sporadic ALS	2017
28642287	Genetic screening in sporadic ALS and FTD	2017
28639078	A Genome-wide Expression Association Analysis Identifies Genes and Pathways Associated with Amyotrophic Lateral Sclerosis	2018
28631957	Prognostic value of clinical and electrodiagnostic parameters at time of diagnosis in patients with amyotrophic lateral sclerosis	2017
28622300	The ALS-linked E102Q mutation in Sigma receptor-1 leads to ER stress-mediated defects in protein homeostasis and dysregulation of RNA-binding proteins	2017
28621357	Computational investigation of the human SOD1 mutant, Cys146Arg, that directs familial amyotrophic lateral sclerosis	2017
28620717	Multiple variants in families with amyotrophic lateral sclerosis and frontotemporal dementia related to C9orf72 repeat expansion: further observations on their oligogenic nature	2017
28615433	Disease progression in C9orf72 mutation carriers	2017
28611571	Exosomes and Homeostatic Synaptic Plasticity Are Linked to Each other and to Huntington's, Parkinson's, and Other Neurodegenerative Diseases by Database-Enabled Analyses of Comprehensively Curated Datasets	2017
28602509	NeuroChip, an updated version of the NeuroX genotyping platform to rapidly screen for variants associated with neurological diseases	2017
28596251	Hypothalamic atrophy is related to body mass index and age at onset in amyotrophic lateral sclerosis	2017
28596248	Examining the language and behavioural profile in FTD and ALS-FTD	2017
28585802	Cu/Zn Superoxide Dismutase Forms Amyloid Fibrils under Near-Physiological Quiescent Conditions: The Roles of Disulfide Bonds and Effects of Denaturant	2017
28576725	Imaging of glial cell morphology, SOD1 distribution and elemental composition in the brainstem and hippocampus of the ALS hSOD1(G93A) rat	2017
28566288	Point mutations in the N-terminal domain of transactive response DNA-binding protein 43 kDa (TDP-43) compromise its stability, dimerization, and functions	2017
28566164	Cervical spinal cord and motor unit pathology in a canine model of SOD1-associated amyotrophic lateral sclerosis	2017
28562080	Neuroimaging patterns along the ALS-FTD spectrum: a multiparametric imaging study	2017
28562075	C9orf72 mutations do not influence the tau signature of amyotrophic lateral sclerosis with cognitive impairment (ALSci)	2017
28558143	Parsing disease-relevant protein modifications from epiphenomena: perspective on the structural basis of SOD1-mediated ALS	2017
28551275	Genetic analysis of VCP and WASH complex genes in a German cohort of sporadic ALS-FTD patients	2017
28544463	Axonal Charcot-Marie-Tooth neuropathy concurrent with distal and proximal weakness by translational elongation of the 3' UTR in NEFH	2017
28542905	Perfecting prediction of mutational impact on the aggregation propensity of the ALS-associated hnRNPA2 prion-like protein	2017
28539884	The Analysis of Two BDNF Polymorphisms G196A/C270T in Chinese Sporadic Amyotrophic Lateral Sclerosis	2017
28533943	Etiology and treatment of amyotrophic lateral sclerosis	2017
28533210	Specific biomarkers for C9orf72 FTD/ALS could expedite the journey towards effective therapies	2017
28529876	Pathology of callosal damage in ALS: An ex-vivo, 7 T diffusion tensor MRI study	2017
28522837	Age-related penetrance of the C9orf72 repeat expansion	2017
28510586	Truncation of the TAR DNA-binding protein 43 is not a prerequisite for cytoplasmic relocalization, and is suppressed by caspase inhibition and by introduction of the A90V sequence variant	2017
28510254	Effects of mutant TDP-43 on the Nrf2/ARE pathway and protein expression of MafK and JDP2 in NSC-34 cells	2017
28490746	Pathogenic p62/SQSTM1 mutations impair energy metabolism through limitation of mitochondrial substrates	2017
28489755	Kennedy disease with difficulty in differential diagnosis: A case report	2017
28485874	ABCB1-Gen-Polymorphismus in einer polnischen Kohorte ist mit Risiko für bullöses Pemphigoid assoziiert	2017
28482638	von Economo Neuron Density and Thalamus Volumes in Behavioral Deficits in Frontotemporal Dementia Cases with and without a C9ORF72 Repeat Expansion	2017
28481984	The DNA damage response (DDR) is induced by the C9orf72 repeat expansion in amyotrophic lateral sclerosis	2017
28478440	Elevated Levels of Selenium Species in Cerebrospinal Fluid of Amyotrophic Lateral Sclerosis Patients with Disease-Associated Gene Mutations	2017
28477711	Association analysis of polymorphisms in VMAT2 and TMEM106B genes for Parkinson's disease, amyotrophic lateral sclerosis and multiple system atrophy	2017
28472174	Augmented quantal release of acetylcholine at the vertebrate neuromuscular junction following tdp-43 depletion	2017
28469040	Mutations in the vesicular trafficking protein annexin A11 are associated with amyotrophic lateral sclerosis	2017
28463106	Nuclear export of misfolded SOD1 mediated by a normally buried NES-like sequence reduces proteotoxicity in the nucleus	2017
28458007	Probing the inhibitory activity of epigallocatechin-gallate on toxic aggregates of mutant (L84F) SOD1 protein through geometry based sampling and steered molecular dynamics	2017
28456305	Target-site and non-target-site resistance mechanisms to ALS inhibiting herbicides in Papaver rhoeas	2017
28445628	Characterization of four Latin American families confirms previous findings and reveals novel features of acid-labile subunit deficiency	2017
28444446	Comparison of the clinical and cognitive features of genetically positive ALS patients from the largest tertiary center in Serbia	2017
28444311	Expression of ALS/FTD-linked mutant CCNF in zebrafish leads to increased cell death in the spinal cord and an aberrant motor phenotype	2017
28430856	A comprehensive analysis of rare genetic variation in amyotrophic lateral sclerosis in the UK	2017
28429524	The investigation of genetic and clinical features in Chinese patients with juvenile amyotrophic lateral sclerosis	2017
28429234	Neuron-to-Neuron Transfer of FUS in Drosophila Primary Neuronal Culture Is Enhanced by ALS-Associated Mutations	2017
28424484	The tandem Agenet domain of fragile X mental retardation protein interacts with FUS	2017
28413711	High-throughput sequencing revealed a novel SETX mutation in a Hungarian patient with amyotrophic lateral sclerosis	2017
28402699	Inhibition of retrograde transport modulates misfolded protein accumulation and clearance in motoneuron diseases	2017
28401346	CRISPR/Cas9-mediated targeted gene correction in amyotrophic lateral sclerosis patient iPSCs	2017
28396410	Spinal motor neuron protein supersaturation patterns are associated with inclusion body formation in ALS	2017
28392072	Non-nuclear Pool of Splicing Factor SFPQ Regulates Axonal Transcripts Required for Normal Motor Development	2017
28389720	Superoxide dismutase 1 is positively selected to minimize protein aggregation in great apes	2017
28389692	Familial Early-Onset Paget's Disease of Bone Associated with a Novel hnRNPA2B1 Mutation	2017
28387671	Predicting Development of Amyotrophic Lateral Sclerosis in Frontotemporal Dementia	2017
28379367	A Drosophila model of ALS reveals a partial loss of function of causative human PFN1 mutants	2017
28378144	Development and Genetic Characterization of A Novel Herbicide (Imazethapyr) Tolerant Mutant in Rice (Oryza sativa L.)	2017
28377462	An aberrant phase transition of stress granules triggered by misfolded protein and prevented by chaperone function	2017
28373810	A Turkish Family with a Familial ALS-positive UBQLN2-S340I Mutation	2016
28366453	Genetic Correction of SOD1 Mutant iPSCs Reveals ERK and JNK Activated AP1 as a Driver of Neurodegeneration in Amyotrophic Lateral Sclerosis	2017
28365590	Familial primary lateral sclerosis or dementia associated with Arg573Gly TBK1 mutation	2017
28365006	Mutations in C19orf12 and intronic repeat expansions in C9orf72 not observed in Iranian Parkinson's disease patients	2017
28360103	Mutations in valosin-containing protein (VCP) decrease ADP/ATP translocation across the mitochondrial membrane and impair energy metabolism in human neurons	2017
28358904	Neurotrophic effects of progranulin in vivo in reversing motor neuron defects caused by over or under expression of TDP-43 or FUS	2017
28342748	RNAi of arcRNA hsrω affects sub-cellular localization of Drosophila FUS to drive neurodiseases	2017
28342179	Common polymorphisms of chemokine (C-X3-C motif) receptor 1 gene modify amyotrophic lateral sclerosis outcome: A population-based study	2018
28335620	A novel mutation of BICD2 gene associated with juvenile amyotrophic lateral sclerosis	2017
28334866	C9orf72 and RAB7L1 regulate vesicle trafficking in amyotrophic lateral sclerosis and frontotemporal dementia	2017
28334804	A critical role of Hrd1 in the regulation of optineurin degradation and aggresome formation	2017
28330421	The proteinopathy of D169G and K263E mutants at the RNA Recognition Motif (RRM) domain of tar DNA-binding protein (tdp43) causing neurological disorders: A computational study	2018
28325066	Comprehensive analysis to explain reduced or increased SOD1 enzymatic activity in ALS patients and their relatives	2017
28321933	Exploring the cause of aggregation and reduced Zn binding affinity by G85R mutation in SOD1 rendering amyotrophic lateral sclerosis	2017
28318595	CHCHD10 mutations in patients with amyotrophic lateral sclerosis in Mainland China	2017
28303143	Copy Number Variation in Acetolactate Synthase Genes of Thifensulfuron-Methyl Resistant Alopecurus aequalis (Shortawn Foxtail) Accessions in Japan	2017
28302159	A data-driven approach links microglia to pathology and prognosis in amyotrophic lateral sclerosis	2017
28300211	ALS Along the Axons - Expression of Coding and Noncoding RNA Differs in Axons of ALS models	2017
28298410	FUS inclusions disrupt RNA localization by sequestering kinesin-1 and inhibiting microtubule detyrosination	2017
28291249	Analysis of SOD1 mutations in a Chinese population with amyotrophic lateral sclerosis: a case-control study and literature review	2017
28290665	Kaplan-Meier Meets Chemical Kinetics: Intrinsic Rate of SOD1 Amyloidogenesis Decreased by Subset of ALS Mutations and Cannot Fully Explain Age of Disease Onset	2017
28288521	Young-onset rapidly progressive ALS associated with heterozygous FUS mutation	2017
28286471	Cytoplasmic Relocalization of TAR DNA-Binding Protein 43 Is Not Sufficient to Reproduce Cellular Pathologies Associated with ALS In vitro	2017
28282387	The essential and downstream common proteins of amyotrophic lateral sclerosis: A protein-protein interaction network analysis	2017
28281833	Mutations of CCNF gene is rare in patients with amyotrophic lateral sclerosis and frontotemporal dementia from Mainland China	2017
28271284	A theoretical study on Zn binding loop mutants instigating destabilization and metal binding loss in human SOD1 protein	2017
28265061	Amyotrophic lateral sclerosis-linked mutations increase the viscosity of liquid-like TDP-43 RNP granules in neurons	2017
28252867	Vernachlässigte klinische Merkmale der follikulotropen Mycosis fungoides: eine große klinische Fallserie	2017
28249955	Clinical and biochemical characteristics and bone mineral density of homozygous, compound heterozygous and heterozygous carriers of three novel IGFALS mutations	2017
28247171	Genetic Counseling Dilemmas for a Patient with Sporadic Amyotrophic Lateral Sclerosis, Frontotemporal Degeneration & Parkinson's Disease	2017
28245518	Altered translational repression of an RNA-binding protein, Elav by AOA2-causative Senataxin mutation	2017
28244008	Liver X Receptor Genes Variants Modulate ALS Phenotype	2018
28239025	The role of single-nucleotide variants of the energy metabolism-linked genes SIRT3, PPARGC1A and APOE in amyotrophic lateral sclerosis risk	2017
28222900	Genetic analysis of the SOD1 and C9ORF72 genes in Hungarian patients with amyotrophic lateral sclerosis	2017
28222201	Linkage and mapping of quantitative trait loci associated with angular leaf spot and powdery mildew resistance in common beans	2017
28197542	The Proline/Arginine Dipeptide from Hexanucleotide Repeat Expanded C9ORF72 Inhibits the Proteasome	2017
28192196	Quantification of various APP-mRNA isoforms and epistasis in Lesch-Nyhan disease	2017
28187987	Association between C677T polymorphism of MTHFR gene and risk of amyotrophic lateral sclerosis: Polish population study and a meta-analysis	2017
28187829	Cross-resistance patterns to acetolactate synthase (ALS)-inhibiting herbicides of flixweed (Descurainia sophia L.) conferred by different combinations of ALS isozymes with a Pro-197-Thr mutation or a novel Trp-574-Leu mutation	2017
28186563	Silencing of the Drosophila ortholog of SOX5 leads to abnormal neuronal development and behavioral impairment	2017
28184284	Puzzles in modern biology. IV. Neurodegeneration, localized origin and widespread decay	2016
28176817	Structural insights into human angiogenin variants implicated in Parkinson's disease and Amyotrophic Lateral Sclerosis	2017
28172957	Reduced stress granule formation and cell death in fibroblasts with the A382T mutation of TARDBP gene: evidence for loss of TDP-43 nuclear function	2016
28160950	Comprehensive targeted next-generation sequencing in Japanese familial amyotrophic lateral sclerosis	2017
28155653	Novel group-based QSAR and combinatorial design of CK-1δ inhibitors as neuroprotective agents	2016
28153046	Mitochondrial DNA point mutations and relative copy number in 1363 disease and control human brains	2017
28140676	Further analysis of KIFAP3 gene in ALS patients from Switzerland and Sweden	2017
28139855	Wildtype motoneurons, ALS-Linked SOD1 mutation and glutamate profoundly modify astrocyte metabolism and lactate shuttling	2017
28131168	HLA-DRA/HLA-DRB5 polymorphism affects risk of sporadic ALS and survival in a southwest Chinese cohort	2017
28125704	No Evidence for Pathogenic Role of UBQLN2 Mutations in Sporadic Amyotrophic Lateral Sclerosis in the Mainland Chinese Population	2017
28124431	C9orf72 and ATXN2 repeat expansions coexist in a family with ataxia, dementia, and parkinsonism	2017
28122516	TDP-43 protein variants as biomarkers in amyotrophic lateral sclerosis	2017
28119399	An ALS-Associated Mutant SOD1 Rapidly Suppresses KCNT1 (Slack) Na(+)-Activated K(+) Channels in Aplysia Neurons	2017
28116236	The neural correlates and clinical characteristics of psychosis in the frontotemporal dementia continuum and the C9orf72 expansion	2016
28105640	The genotype-phenotype landscape of familial amyotrophic lateral sclerosis in Australia	2017
28094300	Sequestration of PRMT1 and Nd1-L mRNA into ALS-linked FUS mutant R521C-positive aggregates contributes to neurite degeneration upon oxidative stress	2017
28089114	Genetic epidemiology of motor neuron disease-associated variants in the Scottish population	2017
28085149	ApoSOD1 lacking dismutase activity neuroprotects motor neurons exposed to beta-methylamino-L-alanine through the Ca(2+)/Akt/ERK1/2 prosurvival pathway	2017
28082870	FUS Mislocalization and Vulnerability to DNA Damage in ALS Patients Derived hiPSCs and Aging Motoneurons	2016
28069952	Toxic PR(n) poly-dipeptides encoded by the C9orf72 repeat expansion block nuclear import and export	2017
28069311	Investigating the role of ALS genes CHCHD10 and TUBA4A in Belgian FTD-ALS spectrum patients	2017
28054830	A novel mutation of the C-terminal amino acid of FUS (Y526C) strengthens FUS gene as the most frequent genetic factor in aggressive juvenile ALS	2017
28051077	FIG4 variants in central European patients with amyotrophic lateral sclerosis: a whole-exome and targeted sequencing study	2017
28040728	Cytoplasmic poly-GA aggregates impair nuclear import of TDP-43 in C9orf72 ALS/FTLD	2017
33693055	Deciphering the molecular logic of ALS using model organisms: "A family affair."	2017
28039894	Exome sequencing establishes a gelsolin mutation as the cause of inherited bulbar-onset neuropathy	2017
28035186	Rapid Progression of Sporadic ALS in a Patient Carrying SOD1 p.Gly13Arg Mutation	2016
28031292	Protein kinase CK2 modulates HSJ1 function through phosphorylation of the UIM2 domain	2017
28029397	Matrin 3 variants are frequent in Italian ALS patients	2017
28025170	Instability of C154Y variant of aldo-keto reductase 1C3	2017
28008748	TBK1 Mutation Spectrum in an Extended European Patient Cohort with Frontotemporal Dementia and Amyotrophic Lateral Sclerosis	2017
28005462	Recognition of c9orf72 Mutant RNA by Single-Stranded Silencing RNAs	2017
28003435	Genetic compendium of 1511 human brains available through the UK Medical Research Council Brain Banks Network Resource	2017
28000042	hnRNPA1 autoregulates its own mRNA expression to remain non-cytotoxic	2017
27999540	A Novel Missense Mutation of the DDHD1 Gene Associated with Juvenile Amyotrophic Lateral Sclerosis	2016
27995069	Longitudinal imaging in C9orf72 mutation carriers: Relationship to phenotype	2016
27982083	NetDiff - Bayesian model selection for differential gene regulatory network inference	2016
27980528	Uterine angioleiomyoma - a rare variant of uterine leiomyoma: review of literature and case reports	2016
27978769	Genetic analysis of patients with familial and sporadic amyotrophic lateral sclerosis in a Brazilian Research Center	2017
27976507	Basis of ACCase and ALS inhibitor resistance in Hordeum glaucum Steud	2017
27956894	Modeling Axonal Defects in Hereditary Spastic Paraplegia with Human Pluripotent Stem Cells	2016
27939697	Genetic and functional analysis of TBK1 variants in Korean patients with sporadic amyotrophic lateral sclerosis	2017
27936955	Sequence variations in C9orf72 downstream of the hexanucleotide repeat region and its effect on repeat-primed PCR interpretation: a large multinational screening study	2017
27915003	Abnormal cell-clearance and accumulation of autophagic vesicles in lymphocytes from patients affected with Ataxia-Teleangiectasia	2017
27909398	An Amyloid-Like Pathological Conformation of TDP-43 Is Stabilized by Hypercooperative Hydrogen Bonds	2016
27892702	Slowly progressive motor neuron disease with multi-system involvement related to p.E121G SOD1 mutation	2017
27888057	Association between rs2294020 in X-linked CCDC22 and susceptibility to autoimmune diseases with focus on systemic lupus erythematosus	2017
27867347	Susceptibility of Mutant SOD1 to Form a Destabilized Monomer Predicts Cellular Aggregation and Toxicity but Not In vitro Aggregation Propensity	2016
27858953	The concept and diagnostic criteria of primary lateral sclerosis	2017
27856299	ALS and FTD linked GGGGCC-repeat containing DNA oligonucleotide folds into two distinct G-quadruplexes	2017
27838743	Intrinsic disorder in proteins involved in amyotrophic lateral sclerosis	2017
27819158	Diagnostic and prognostic significance of neurofilament light chain NF-L, but not progranulin and S100B, in the course of amyotrophic lateral sclerosis: Data from the German MND-net	2017
27815125	Meeting report: 29th International Conference on Antiviral Research in La Jolla, CA, USA	2017
27814735	Gene expression profiles and protein-protein interaction networks in amyotrophic lateral sclerosis patients with C9orf72 mutation	2016
27667694	A Phosphomimetic Mutation Stabilizes SOD1 and Rescues Cell Viability in the Context of an ALS-Associated Mutation	2016
27656112	New links between SOD1 and metabolic dysfunction from a yeast model of amyotrophic lateral sclerosis	2016
27797809	Timing and significance of pathological features in C9orf72 expansion-associated frontotemporal dementia	2016
27794540	PINK1 and Parkin are genetic modifiers for FUS-induced neurodegeneration	2016
26563499	Parkin Protects Against Misfolded SOD1 Toxicity by Promoting Its Aggresome Formation and Autophagic Clearance	2016
27791136	Probing the free energy landscapes of ALS disease mutants of SOD1 by NMR spectroscopy	2016
27790088	Rare Variants in Neurodegeneration Associated Genes Revealed by Targeted Panel Sequencing in a German ALS Cohort	2016
27773815	cIAPs promote the proteasomal degradation of mutant SOD1 linked to familial amyotrophic lateral sclerosis	2016
27785391	The role of RNA metabolism in neurological diseases	2016
27718307	Sen1, the homolog of human Senataxin, is critical for cell survival through regulation of redox homeostasis, mitochondrial function, and the TOR pathway in Saccharomyces cerevisiae	2016
27694260	Whole-exome sequencing identifies a missense mutation in hnRNPA1 in a family with flail arm ALS	2016
27595458	Identification of a novel loss-of-function C9orf72 splice site mutation in a patient with amyotrophic lateral sclerosis	2016
27753163	Structural explanation of poor prognosis of amyotrophic lateral sclerosis in the non-demented state	2017
27738760	ALS and MMN mimics in patients with BSCL2 mutations: the expanding clinical spectrum of SPG17 hereditary spastic paraplegia	2017
27688599	Cognitive Impairment Involving Social Cognition in SPG4 Hereditary Spastic Paraplegia	2016
27686364	Charcot-Marie-Tooth disease type 2G redefined by a novel mutation in LRSAM1	2016
27671242	Mitochondrial Membrane Protein-Associated Neurodegeneration Mimicking Juvenile Amyotrophic Lateral Sclerosis	2016
27663272	C9orf72 expansion differentially affects males with spinal onset amyotrophic lateral sclerosis	2017
29263818	The ONDRISeq panel: custom-designed next-generation sequencing of genes related to neurodegeneration	2016
27634045	Familial Amyotrophic Lateral Sclerosis-linked Mutations in Profilin 1 Exacerbate TDP-43-induced Degeneration in the Retina of Drosophila melanogaster through an Increase in the Cytoplasmic Localization of TDP-43	2016
27624123	Corticoefferent pathways in pure lower motor neuron disease: a diffusion tensor imaging study	2016
27623516	Altered cortical beta-band oscillations reflect motor system degeneration in amyotrophic lateral sclerosis	2017
27620379	Structural insights into the interaction and disease mechanism of neurodegenerative disease-associated optineurin and TBK1 proteins	2016
27615052	A novel missense mutation of CMT2P alters transcription machinery	2016
27613758	Renin-angiotensin system gene expression and neurodegenerative diseases	2016
27604643	Screening of SOD1, FUS and TARDBP genes in patients with amyotrophic lateral sclerosis in central-southern China	2016
27603566	Destabilization of the metal site as a hub for the pathogenic mechanism of five ALS-linked mutants of copper, zinc superoxide dismutase	2016
27602988	A New Phase in ALS Research	2016
27602892	A model of recurrent concussion that leads to long-term motor deficits, CTE-like tauopathy and exacerbation of an ALS phenotype	2016
27584932	Rare genetic variation in UNC13A may modify survival in amyotrophic lateral sclerosis	2016
27578015	Identification of CHCHD10 Mutation in Chinese Patients with Alzheimer Disease	2017
27573046	Distal hereditary motor neuropathy type 7B with Dynactin 1 mutation	2016
27557666	No common founder for C9orf72 expansion mutation in Sweden	2017
27556028	Screening of Drugs Inhibiting In vitro Oligomerization of Cu/Zn-Superoxide Dismutase with a Mutation Causing Amyotrophic Lateral Sclerosis	2016
27554286	ALS-FTLD associated mutations of SQSTM1 impact on Keap1-Nrf2 signalling	2016
27552911	Linear ubiquitination is involved in the pathogenesis of optineurin-associated amyotrophic lateral sclerosis	2016
27552392	What's in the Literature?	2016
27547209	Multiple Herbicide Resistance in Lolium multiflorum and Identification of Conserved Regulatory Elements of Herbicide Resistance Genes	2016
27545679	Absence of the Autophagy Adaptor SQSTM1/p62 Causes Childhood-Onset Neurodegeneration with Ataxia, Dystonia, and Gaze Palsy	2016
27545621	ALS Mutations Disrupt Phase Separation Mediated by α-Helical Structure in the TDP-43 Low-Complexity C-Terminal Domain	2016
27543311	Prominent sensory involvement in a case of familial amyotrophic lateral sclerosis carrying the L8V SOD1 mutation	2016
27538669	Mutational analysis of CHCHD2 in Chinese patients with multiple system atrophy and amyotrophic lateral sclerosis	2016
27538664	One family, one gene and three phenotypes: A novel VCP (valosin-containing protein) mutation associated with myopathy with rimmed vacuoles, amyotrophic lateral sclerosis and frontotemporal dementia	2016
27534431	A novel amyotrophic lateral sclerosis mutation in OPTN induces ER stress and Golgi fragmentation in vitro	2017
30838278	TARDBP Mutation Presenting as Progressive Hemiplegia	2016
27518558	Look Out Autophagy, Ubiquilin UPS Its Game	2016
27496206	An in silico study of the effect of SOD1 electrostatic loop dynamics on amyloid‑like filament formation	2016
27495977	Target-site and non-target-site based resistance to the herbicide tribenuron-methyl in flixweed (Descurainia sophia L.)	2016
27492805	Molecular Chaperones in the Pathogenesis of Amyotrophic Lateral Sclerosis: The Role of HSPB1	2016
27489873	Expanding the phenotypic associations of globular glial tau subtypes	2016
27488601	Comparative analysis of C9orf72 and sporadic disease in an ALS clinic population	2016
27484150	Spatiotemporal dynamics of autophagy receptors in selective mitophagy	2016
27480424	C9ORF72 and UBQLN2 mutations are causes of amyotrophic lateral sclerosis in New Zealand: a genetic and pathologic study using banked human brain tissue	2017
27464601	Impairment of SOD1-G93A motility is linked to mitochondrial movement in axons of hippocampal neurons	2016
27460825	ZNStress: a high-throughput drug screening protocol for identification of compounds modulating neuronal stress in the transgenic mutant sod1G93R zebrafish model of amyotrophic lateral sclerosis	2016
27460707	Proteomic analysis of FUS interacting proteins provides insights into FUS function and its role in ALS	2016
27455348	Genome-wide association analyses identify new risk variants and the genetic architecture of amyotrophic lateral sclerosis	2016
27455347	NEK1 variants confer susceptibility to amyotrophic lateral sclerosis	2016
27446352	Splicing variants of ADAR2 and ADAR2-mediated RNA editing in glioma	2016
27444855	Familial amyotrophic lateral sclerosis with an I104F mutation in the SOD1 gene: Multisystem degeneration with neurofilamentous aggregates and SOD1 inclusions	2017
27432186	Profilin 1 mutants form aggregates that induce accumulation of prion-like TDP-43	2016
27428653	ALS disrupts spinal motor neuron maturation and aging pathways within gene co-expression networks	2016
27423564	Japanese version of the ALS-FTD-Questionnaire (ALS-FTD-Q-J)	2016
27418673	Aberrant Subcellular Dynamics of Sigma-1 Receptor Mutants Underlying Neuromuscular Diseases	2016
27414033	Amyotrophic Lateral Sclerosis Type 20 - In Silico Analysis and Molecular Dynamics Simulation of hnRNPA1	2016
27388677	The role of the FTD-ALS associated C9orf72 expansion in suicide victims	2016
27381509	R521C and R521H mutations in FUS result in weak binding with Karyopherinβ2 leading to Amyotrophic lateral sclerosis: a molecular docking and dynamics study	2017
27378311	SALS-linked WT-SOD1 adopts a highly similar helical conformation as FALS-causing L126Z-SOD1 in a membrane environment	2016
27370226	TDP-43 regulates endogenous retrovirus-K viral protein accumulation	2016
27348463	H46R SOD1 mutation is consistently associated with a relatively benign form of amyotrophic lateral sclerosis with slow progression	2016
27344208	Neurodegeneration in tauopathies and synucleinopathies	2016
27343041	Deficient RNA-editing enzyme ADAR2 in an amyotrophic lateral sclerosis patient with a FUS(P525L) mutation	2016
27331657	CACNA1H missense mutations associated with amyotrophic lateral sclerosis alter Cav3.2 T-type calcium channel activity and reticular thalamic neuron firing	2016
27327087	C9ORF72 G4C2-repeat expansion and frontotemporal dementia first reported case in Argentina	2016
27318155	Differentiation of control and ALS mutant human iPSCs into functional skeletal muscle cells, a tool for the study of neuromuscolar diseases	2016
27318084	Delineating the relationship between amyotrophic lateral sclerosis and frontotemporal dementia: Sequence and structure-based predictions	2016
27313233	Mutation spectrum of Chinese patients with familial and sporadic amyotrophic lateral sclerosis	2016
27288806	TDP-43 in the hypoglossal nucleus identifies amyotrophic lateral sclerosis in behavioral variant frontotemporal dementia	2016
27282955	A faulty interaction between SOD1 and hCCS in neurodegenerative disease	2016
27280171	Defining the spectrum of frontotemporal dementias associated with TARDBP mutations	2016
27261500	Defining SOD1 ALS natural history to guide therapeutic clinical trial design	2017
27261461	Cellular Redox Systems Impact the Aggregation of Cu,Zn Superoxide Dismutase Linked to Familial Amyotrophic Lateral Sclerosis	2016
27260353	Screening of the TBK1 gene in familial and sporadic amyotrophic lateral sclerosis patients of Chinese origin	2016
27260291	Cognition and eating behavior in amyotrophic lateral sclerosis: effect on survival	2016
27252488	Minor intron splicing is regulated by FUS and affected by ALS-associated FUS mutants	2016
27247382	Dynamic recruitment and activation of ALS-associated TBK1 with its target optineurin are required for efficient mitophagy	2016
27244217	Association of a Locus in the CAMTA1 Gene With Survival in Patients With Sporadic Amyotrophic Lateral Sclerosis	2016
27241037	C9orf72 Hexanucleotide Repeat Analysis in Cases with Pathologically Confirmed Dementia with Lewy Bodies	2016
27239526	Semantic and nonfluent aphasic variants, secondarily associated with amyotrophic lateral sclerosis, are predominant frontotemporal lobar degeneration phenotypes in TBK1 carriers	2015
27226613	Pathogenic Mutations in the Valosin-containing Protein/p97(VCP) N-domain Inhibit the SUMOylation of VCP and Lead to Impaired Stress Response	2016
27226551	Developmentally Regulated RNA-binding Protein 1 (Drb1)/RNA-binding Motif Protein 45 (RBM45), a Nuclear-Cytoplasmic Trafficking Protein, Forms TAR DNA-binding Protein 43 (TDP-43)-mediated Cytoplasmic Aggregates	2016
27224441	What's in the Literature?	2016
27206883	SLC1A2 rs3794087 are associated with susceptibility to Parkinson's disease, but not essential tremor, amyotrophic lateral sclerosis or multiple system atrophy in a Chinese population	2016
27197982	Human Senataxin Modulates Structural Plasticity of the Neuromuscular Junction in Drosophila through a Neuronally Conserved TGFβ Signalling Pathway	2016
27195002	Cerebrospinal Fluid TDP-43 in Frontotemporal Lobar Degeneration and Amyotrophic Lateral Sclerosis Patients with and without the C9ORF72 Hexanucleotide Expansion	2016
27185954	Variants within the SP110 nuclear body protein modify risk of canine degenerative myelopathy	2016
[truncated: 2,294 more rows]
